# Supplementary material for: Remote control of anion binding by CH-based receptors
Source: Royal Society of Chemistry journal article supplement (doi:10.1039/d3cc06038a), 2024-01-01
Supplement: d3cc06038a1.pdf [file d3cc06038a1.pdf]

## Supporting Information

### Remote control of anion binding by CH-based receptors

Paulina Jurek,<sup>a</sup> Marek P. Szymański<sup>a</sup> and Agnieszka Szumna<sup>\*a</sup>

<sup>a</sup> Institute of Organic Chemistry Polish Academy of Sciences; Kasprzaka 44/52, 01-224 Warsaw, Poland

E-mail: agnieszka.szumna@icho.edu.pl

## Table of contents

|                                                                                                                 |    |
|-----------------------------------------------------------------------------------------------------------------|----|
| 1. General information .....                                                                                    | 3  |
| 2. Synthesis.....                                                                                               | 3  |
| 3. NMR titrations .....                                                                                         | 11 |
| 3.1 Titrations of <b>4</b> with But <sub>4</sub> NX in various solvents .....                                   | 11 |
| 3.2 Titrations of <b>5</b> with But <sub>4</sub> NX in various solvents .....                                   | 13 |
| 3.3 Titrations of <b>6</b> with But <sub>4</sub> NX in various solvents .....                                   | 14 |
| 3.4 Titrations of <b>8</b> with But <sub>4</sub> NX in various solvents .....                                   | 19 |
| 3.5 Titrations of <b>9</b> with But <sub>4</sub> NX in various solvents .....                                   | 24 |
| 4. Comparison of Cl <sup>-</sup> and Br <sup>-</sup> complexation by receptor <b>6</b> and VT NMR spectra ..... | 30 |
| 5. Theoretical calculations.....                                                                                | 31 |
| 6. References .....                                                                                             | 75 |

## 1. General information

All solvents and chemicals used were purchased from Sigma Aldrich, TCI Europe N. V., Roth, Chem Impex Inc. and Euriso-top, were of reagent grade and were used without further purification.

$^1\text{H}$  and  $^{13}\text{C}$  NMR spectra were recorded on Bruker 400 MHz and Varian 600 MHz or 500 MHz instruments with residual solvent signal as internal standard. All 2D NMR spectra were recorded at 298 K on Varian 600 MHz with residual solvent signal as internal standard.

IR spectra were measured on JASCO FT/IR-6200.

High resolution ESI mass spectra were recorded on a SYNAPT spectrometer.

## 2. Synthesis

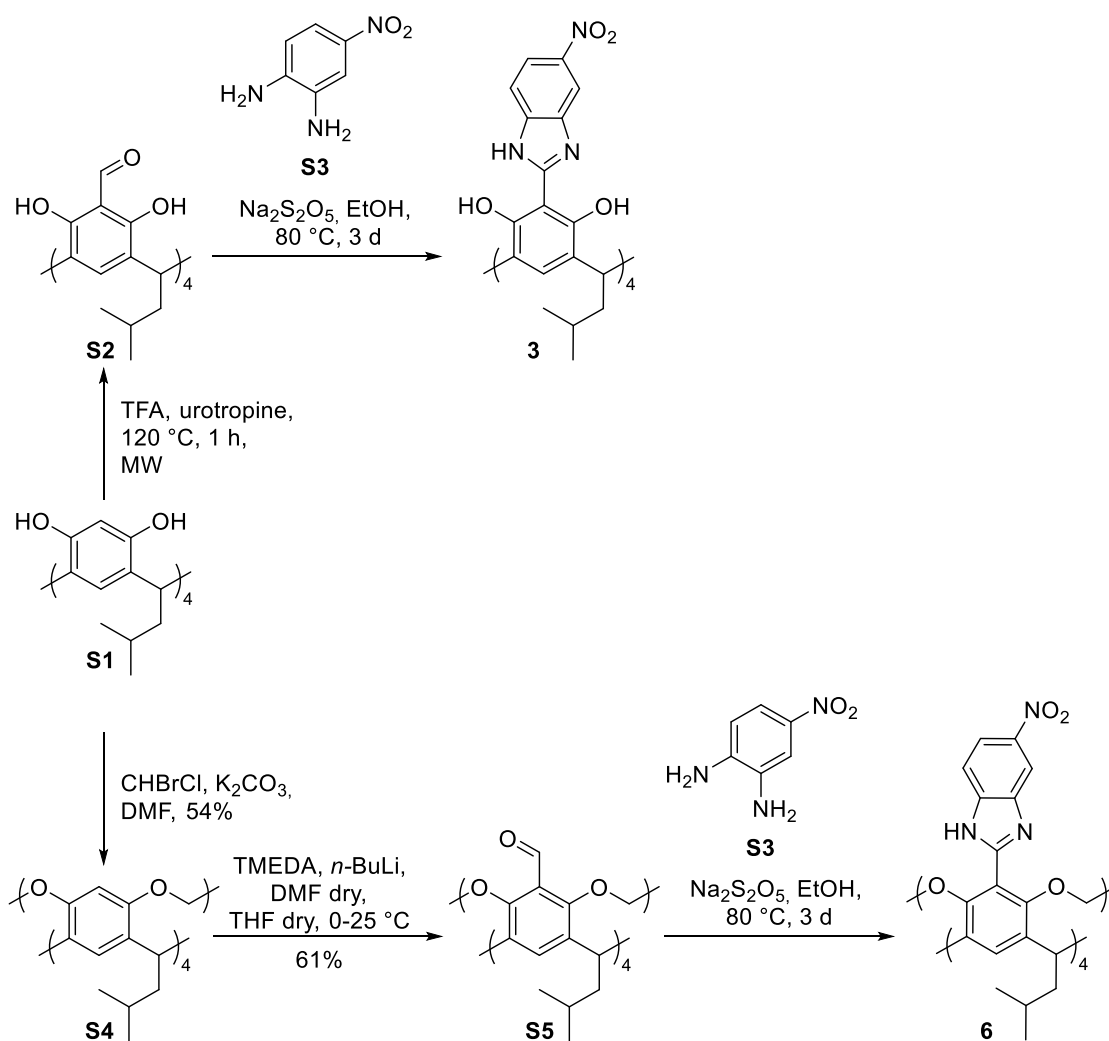

Figure S1. Synthesis of 6 and 9.

**S1:** Obtained by the literature procedure.<sup>1</sup> Analytical data are in agreement with the literature data.  
**S2:** Obtained by the literature procedure.<sup>2</sup> Analytical data are in agreement with the literature data.  
**S4:** Obtained by the literature procedure.<sup>3</sup> Analytical data are in agreement with the literature data.  
**S5:** Obtained by the literature procedure.<sup>3</sup> Analytical data are in agreement with the literature data.  
**4:** Obtained by the literature procedure.<sup>3</sup> Analytical data are in agreement with the literature data.  
**5:** Obtained by the literature procedure.<sup>4</sup> Analytical data are in agreement with the literature data.

**6:** Tetraformylresorcin[4]arene **S2** (100 mg, 0.106 mmol) and 1,2-diamino-4-nitrobenzene **S3** (65.24 mg, 0.426 mmol) were dissolved in ethanol (5 ml), then 2.85 M solution of Na<sub>2</sub>S<sub>2</sub>O<sub>5</sub> (0.34 ml) was added. The reaction mixture was stirred for 3 days at 80 °C. Then 1 M solution of HCl (2.12 ml) was added. The precipitate was collected and washed with water and diethyl ether. Product **3** was obtained as orange solid, yield 64% (92 mg, 0.0678 mmol).

<sup>1</sup>H NMR (600 MHz, [D<sub>6</sub>]DMSO, 298 K) δ 12.80 (brs, NH), 8.55 (s, 4H), 8.14 (d, *J* = 8.2 Hz, 4H), 7.83 (d, *J* = 8.7 Hz, 4H), 7.79 (s, 4H), 4.77 (brt, 4H), 2.31 (brt, 8H), 1.52 (brm, 4H), 1.04 (d, *J* = 4.9 Hz, 24H).

<sup>13</sup>C NMR (150 MHz, [D<sub>6</sub>]DMSO, 298 K) δ 154.5, 152.6, 143.1, 139.9, 134.7, 128.6, 124.3, 118.5, 115.1, 111.1, 100.7, 41.7, 31.3, 26.2, 22.7.

Diffusion coefficient (DOSY) 1.16·10<sup>-10</sup> m<sup>2</sup> s<sup>-1</sup> in [D<sub>6</sub>]DMSO, diameter 1.72 nm.

HRMS (ESI): *m/z* calcd for C<sub>72</sub>H<sub>68</sub>N<sub>12</sub>O<sub>16</sub>+Na 1379.4774 [*M* + Na]<sup>+</sup>, found 1379.4783; |Δ| = 0.7 ppm.

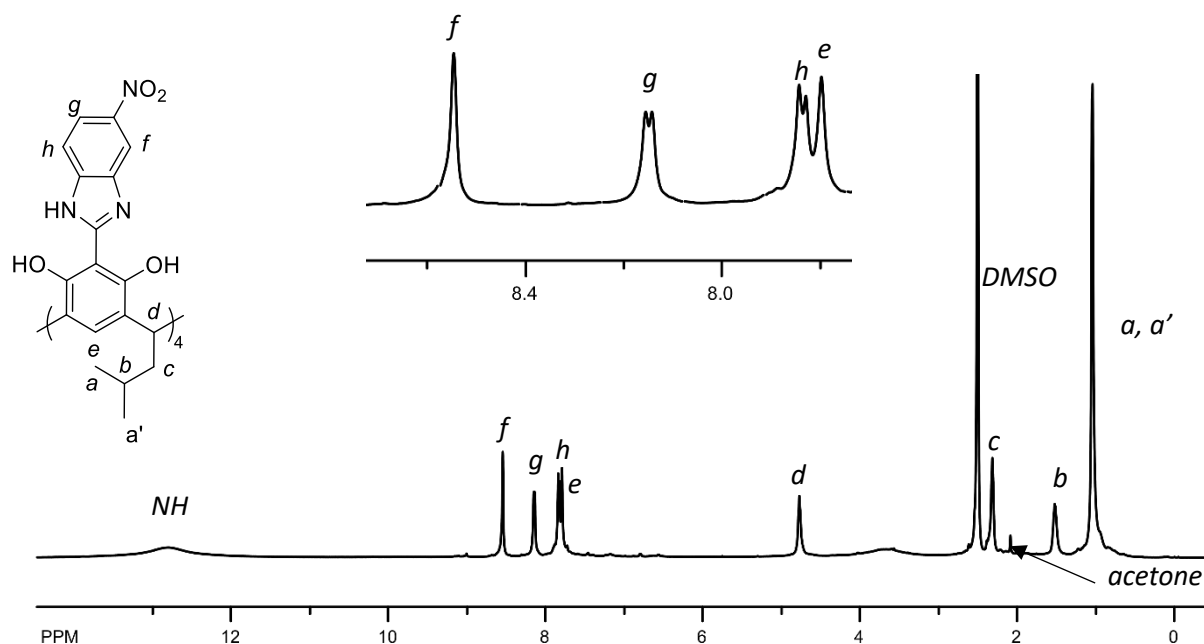

**Figure S2.** <sup>1</sup>H NMR spectrum of **6** (600 MHz, [D<sub>6</sub>]DMSO, 298 K).

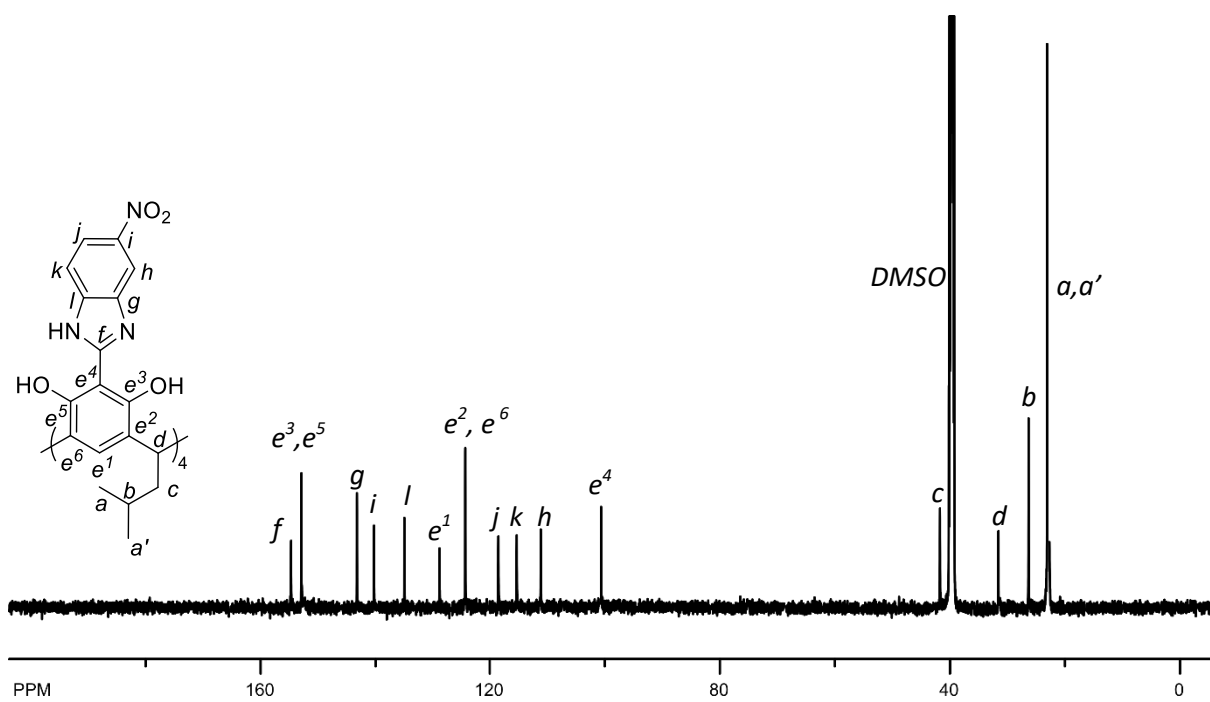

**Figure S3.** <sup>13</sup>C NMR spectrum of **6** (150 MHz, [D<sub>6</sub>]DMSO, 298 K).

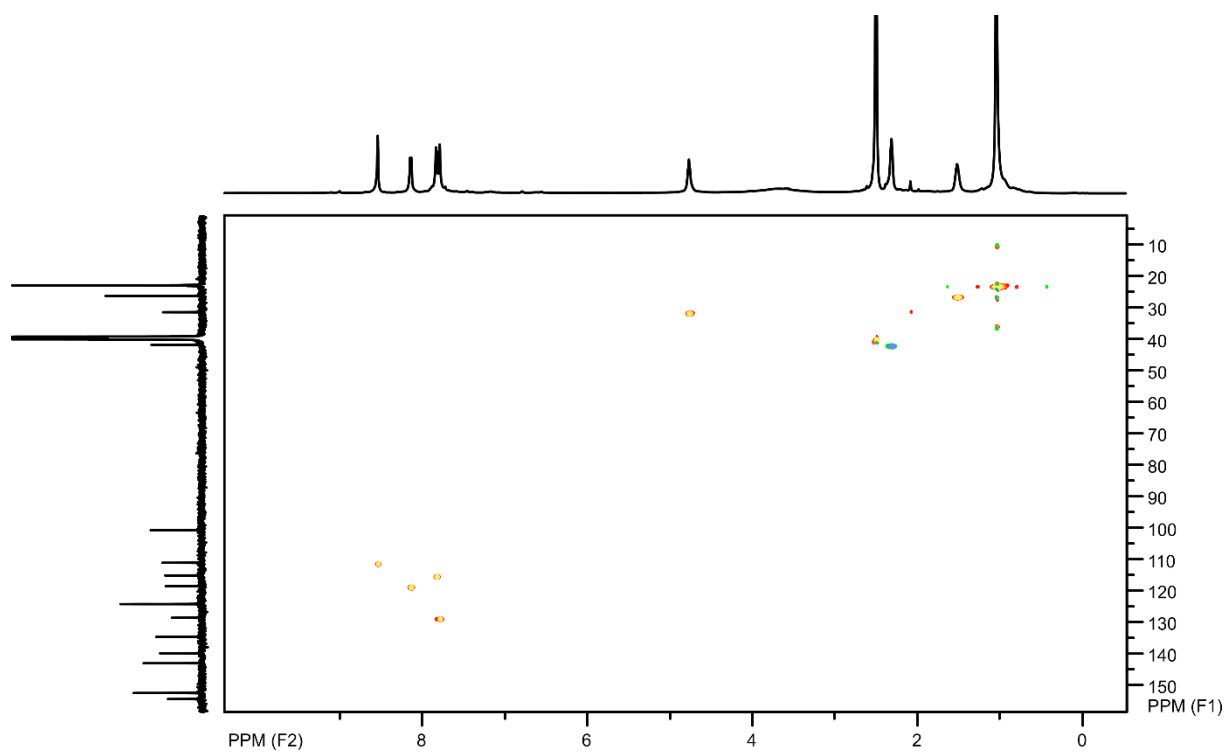

**Figure S4.** HSQC-NMR spectrum of **6** (600 MHz, [D<sub>6</sub>]DMSO, 298 K).

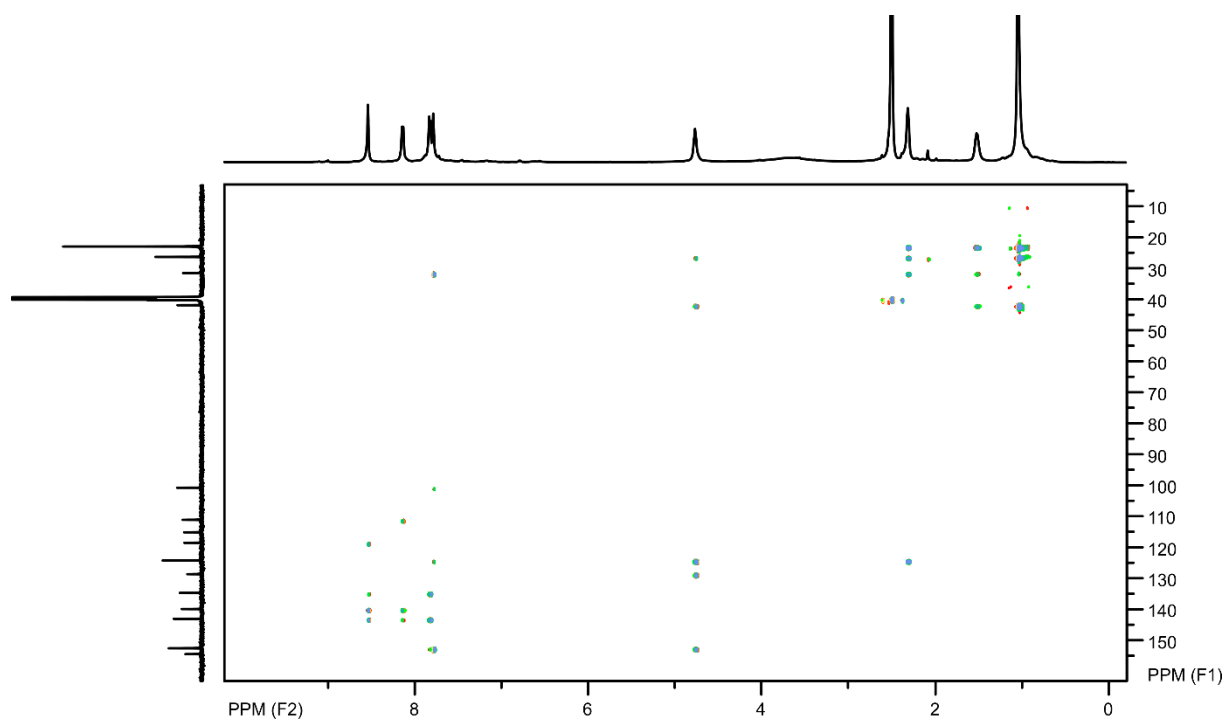

**Figure S5.** HMBC-NMR spectrum of **6** (600 MHz, [D<sub>6</sub>]DMSO, 298 K).

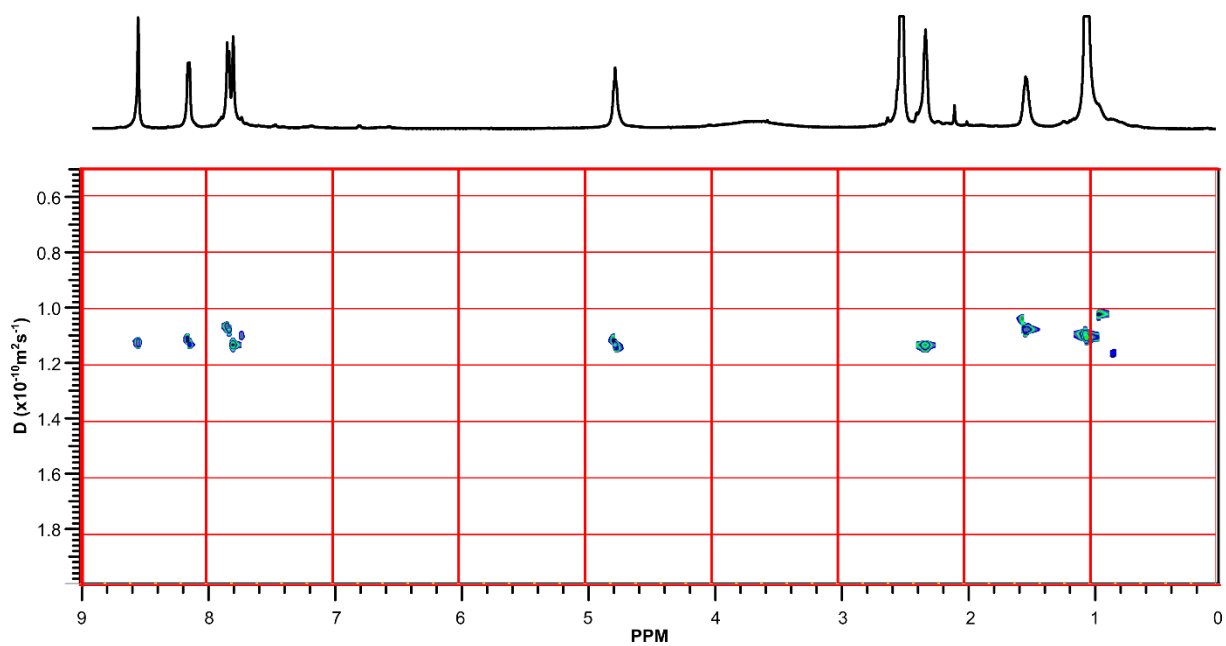

**Figure S6.** DOSY-NMR spectrum of **6** (600 MHz, [D<sub>6</sub>]DMSO, 298 K).

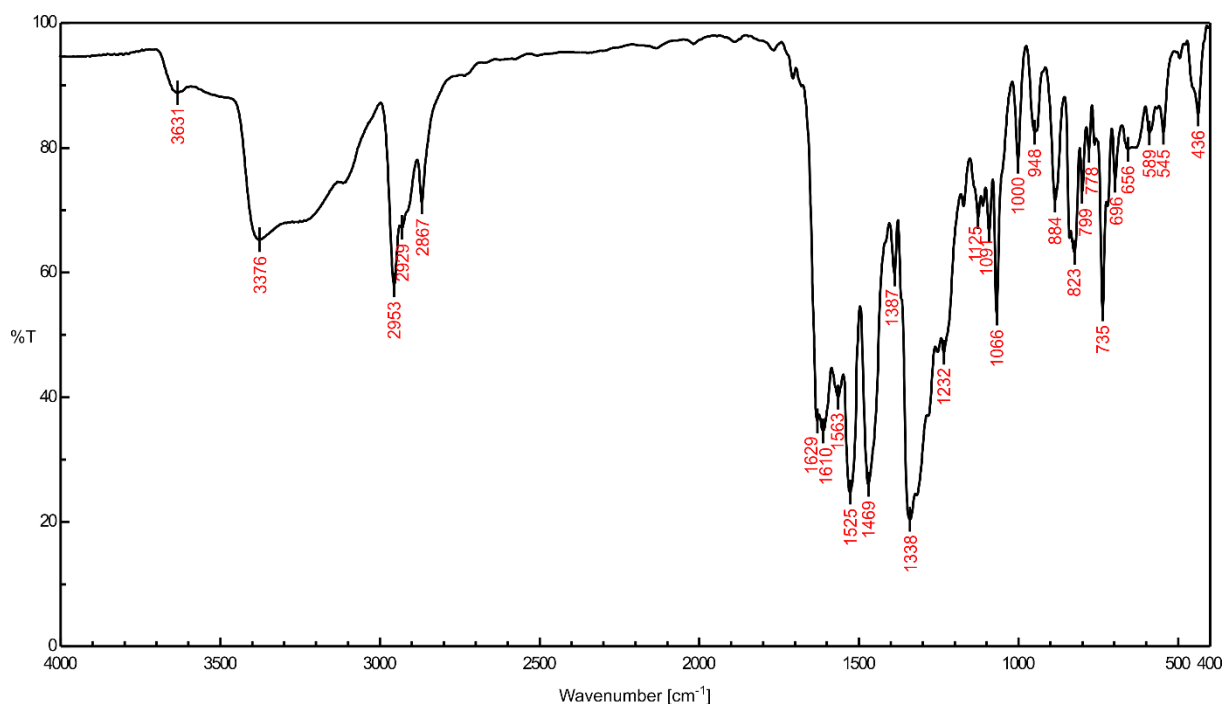

**Figure S7.** FT-IR (KBr) spectrum of **6**.

**7:** Obtained by the literature procedure.<sup>3</sup> Analytical data are in agreement with the literature data.

**8:** Obtained by the literature procedure.<sup>4</sup> Analytical data are in agreement with the literature data.

**9:** Tetraformylresorcin[4]arene **S5** (95.54 mg, 0.106 mmol) and 1,2-diamino-4-nitrobenzene **S3** (65.24 mg, 0.426 mmol) were dissolved in ethanol (5 ml), then 2.85 M solution of Na<sub>2</sub>S<sub>2</sub>O<sub>5</sub> (0.34 ml) was added. The reaction mixture was stirred for 3 days at 80 °C. Then 1 M solution of HCl (2.12 ml) was added. The precipitate was collected and washed with water and diethyl ether. Product **9** was obtained as orange solid, yield 60% (89.4 mg, 0.0636 mmol).

<sup>1</sup>H NMR (600 MHz, [D<sub>6</sub>]DMSO, 298 K) δ (broad spectrum) 8.43 (s, 4H), 8.07 (brd, 4H), 8.00 (s, 4H), 7.70 (brd, 4H), 5.37 (brd, 4H), 4.9764 (brt, 4H), 4.56 (brd, 4H), 2.45 (overlap with DMSO, 8H), 1.61 (brm, 4H), 1.07 (brd, 24H).

<sup>13</sup>C NMR (150 MHz, [D<sub>6</sub>]DMSO, 298 K) δ 152.6, 149.9, 142.6, 138.7, 124.6, 119.5, 117.7, 113.6, 99.7, 38.0, 34.6, 26.1, 22.6.

**Diffusion coefficient (DOSY)** 1.12·10<sup>-10</sup> m<sup>2</sup> s<sup>-1</sup> in [D<sub>6</sub>]DMSO, diameter **1.78 nm**.

**HRMS (ESI):** m/z calcd for C<sub>72</sub>H<sub>68</sub>N<sub>12</sub>O<sub>16</sub>+Na 1405.4954 [M + H]<sup>+</sup>, found 1405.4938; |Δ| = 1.1 ppm.

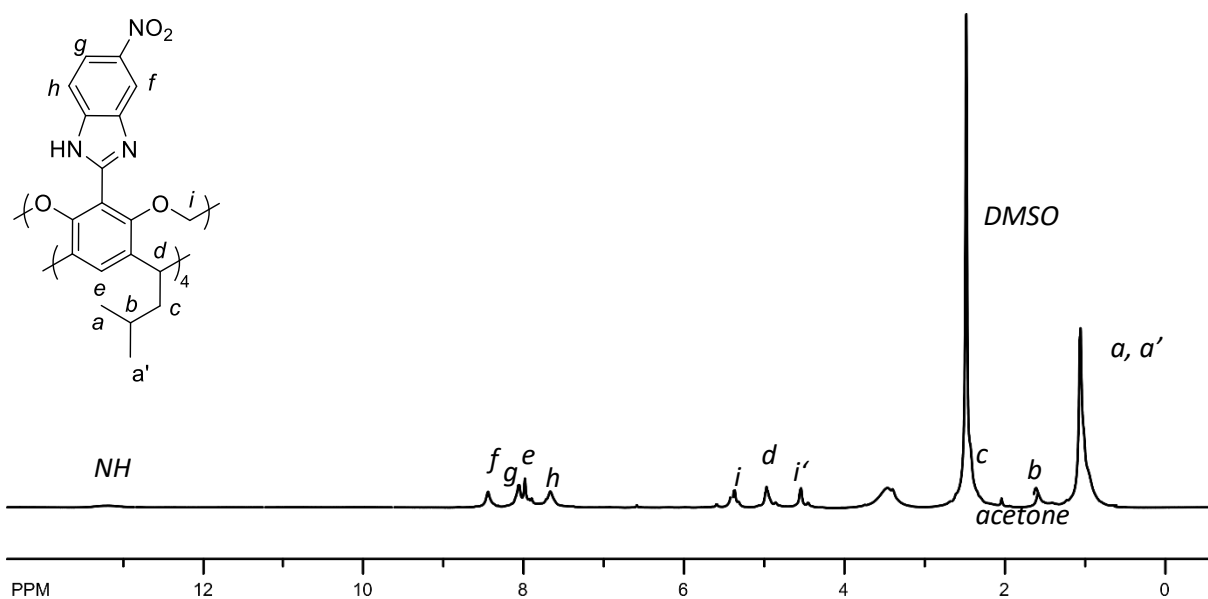

**Figure S8.**  $^1\text{H}$  NMR spectrum of **9** (600 MHz,  $[\text{D}_6]$ DMSO, 298 K).

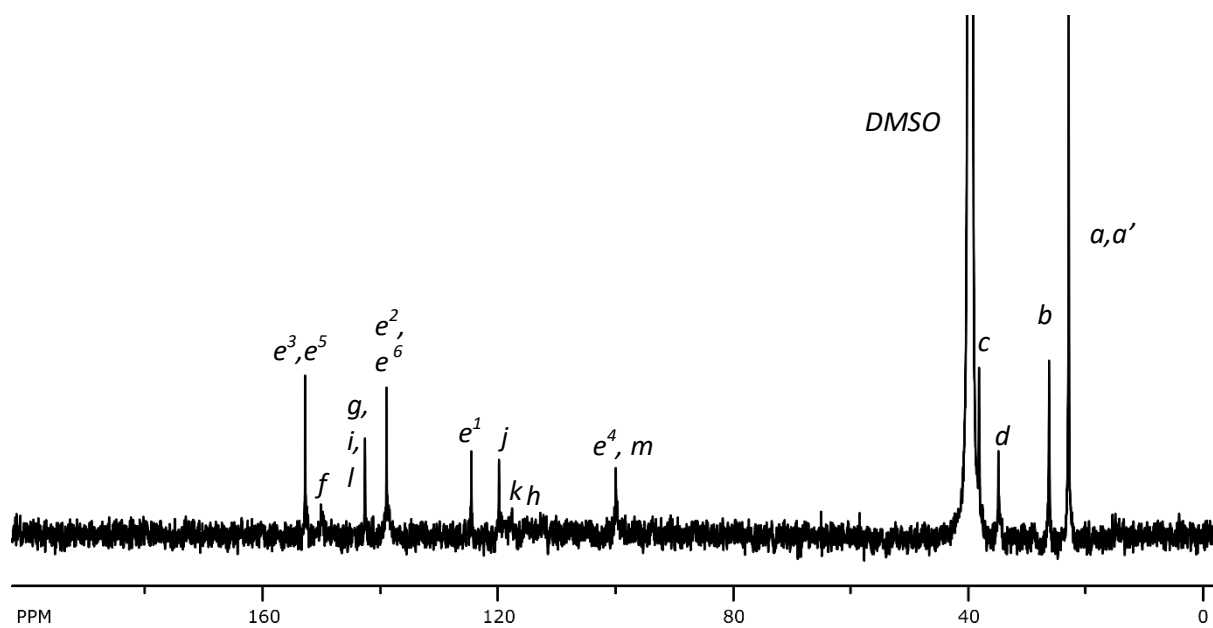

**Figure S9.**  $^{13}\text{C}$  NMR spectrum of **9** (150 MHz,  $[\text{D}_6]$ DMSO, 298 K).



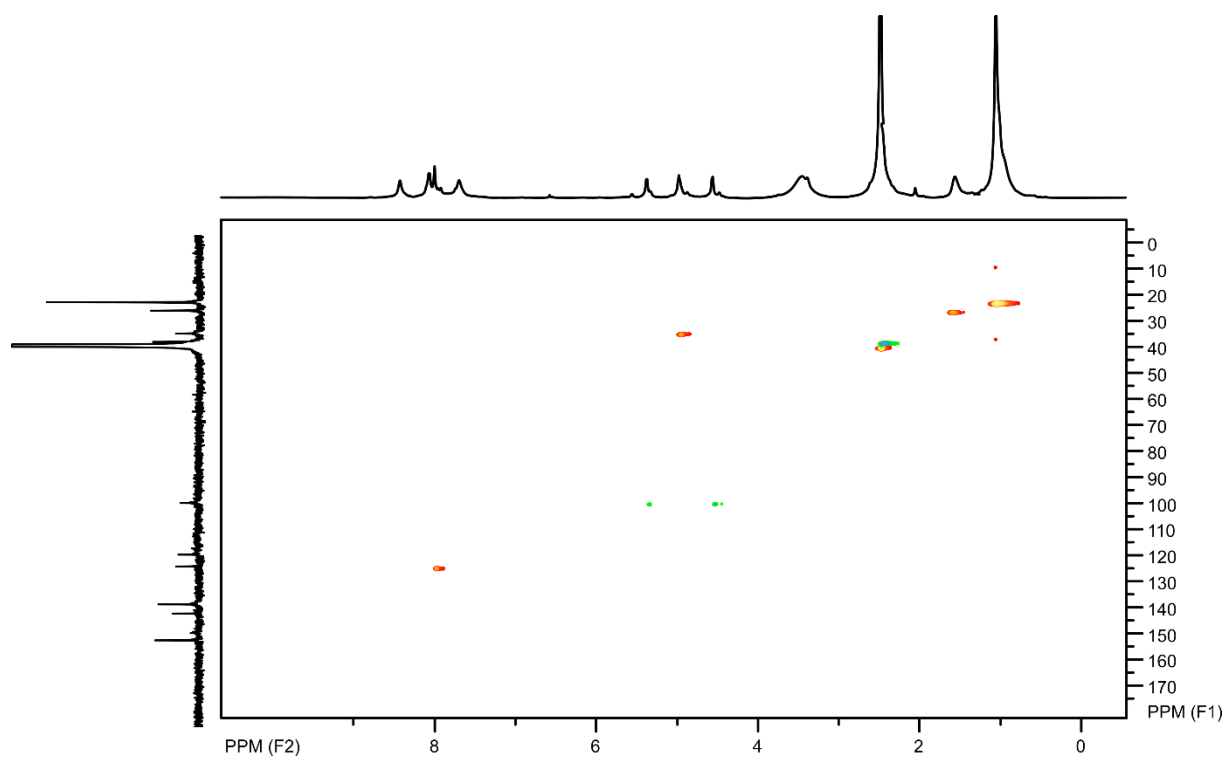

**Figure S10.** HSQC-NMR spectrum of **9** (600 MHz, [D<sub>6</sub>]DMSO, 298 K).

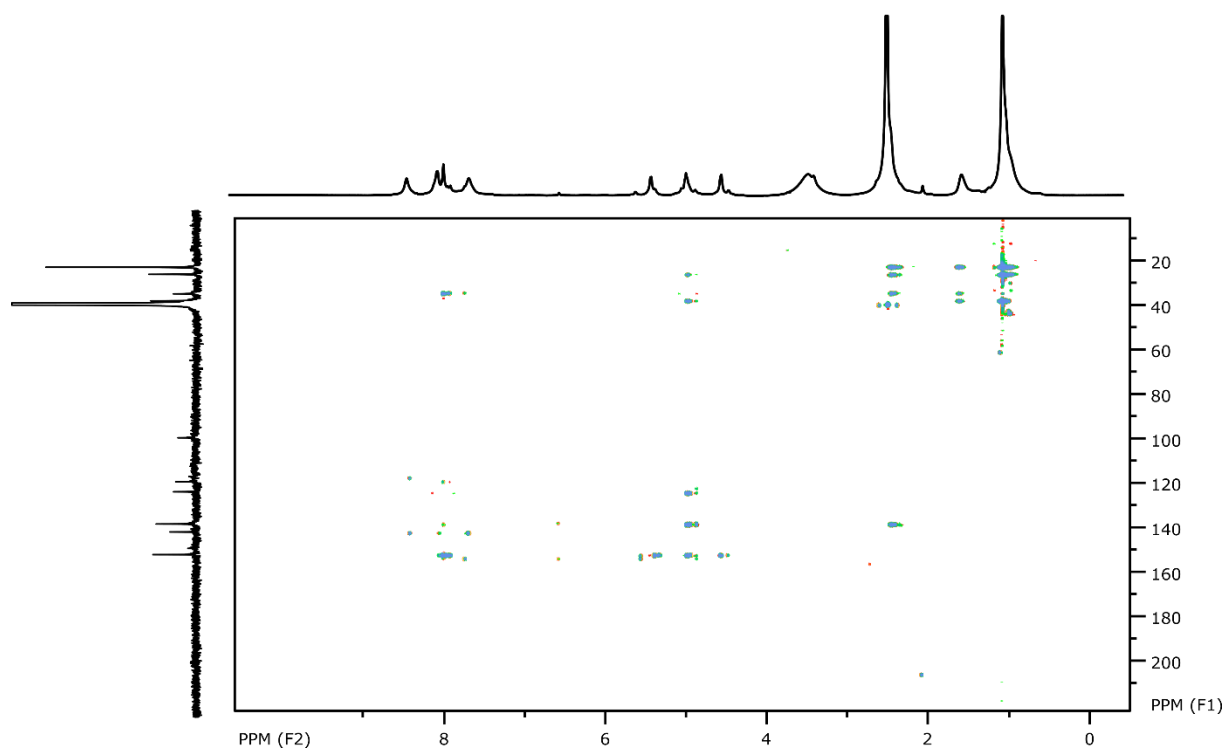

**Figure S11.** HMBC-NMR spectrum of **9** (600 MHz, [D<sub>6</sub>]DMSO, 298 K).

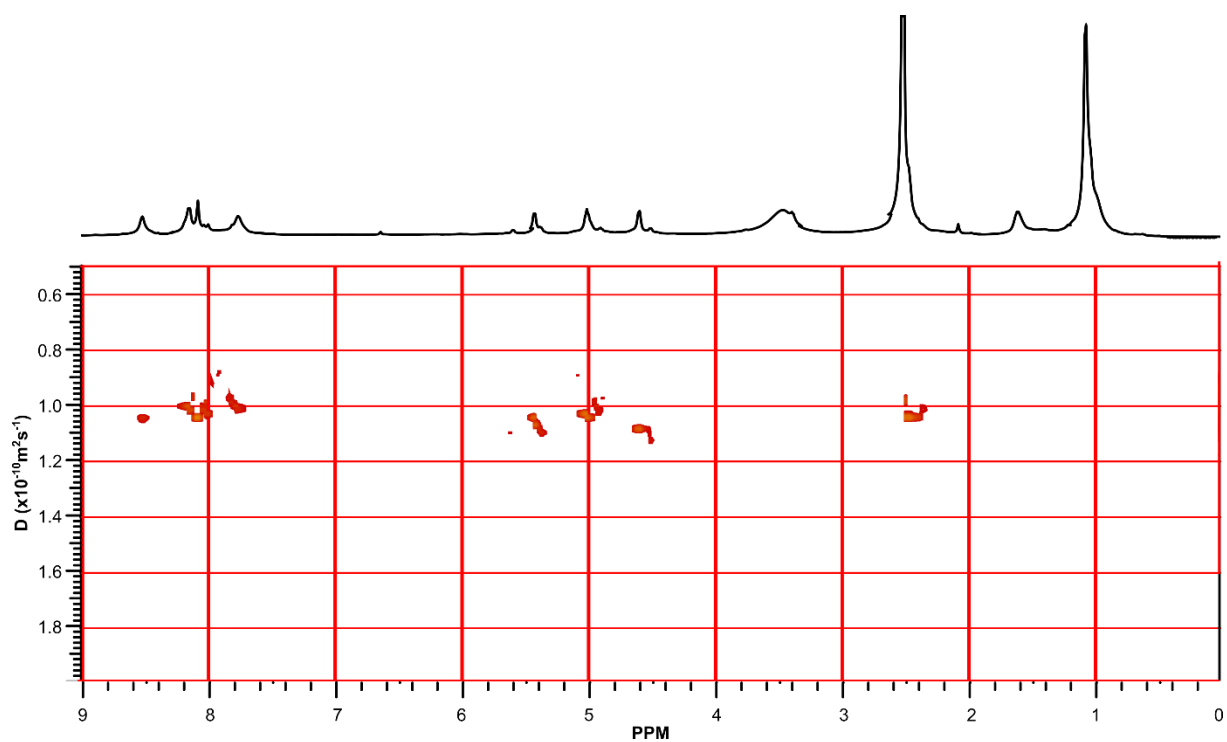

**Figure S12.** DOSY-NMR spectrum of **9** (600 MHz, [D<sub>6</sub>]DMSO, 298 K).

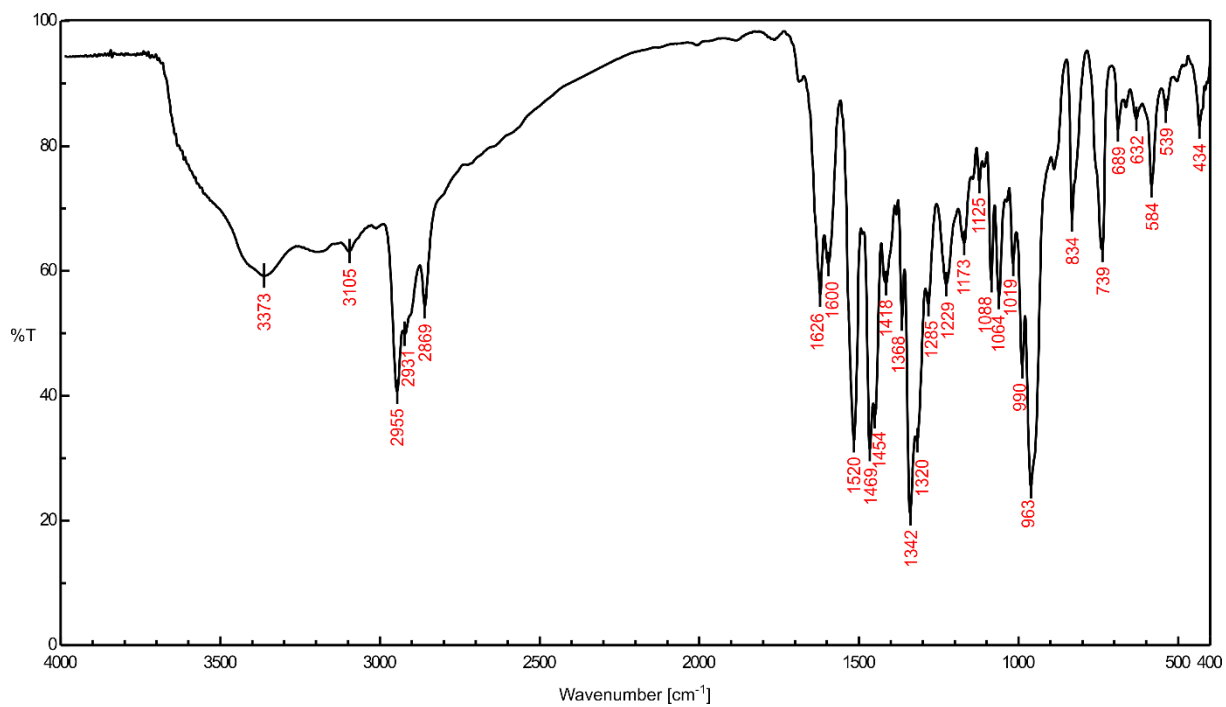

**Figure S13.** FT-IR (KBr) spectrum of **9**.

### 3. NMR titrations

#### General procedure for $^1\text{H}$ NMR titrations

To the solution of macrocycle (4-9) ( $C = 2 \text{ mM}$ ) in deuterated solvent:  $[\text{D}_8]\text{THF}$  or  $[\text{D}_6]\text{DMSO}$  or  $[\text{D}_7]\text{DMF}$  or mixture (0.5 ml) a solution containing a guest ( $C = 45 \text{ mM}$ ) and the macrocycle ( $C = 2 \text{ mM}$ ) in deuterated solvent (1 ml) was added in portions.

#### 3.1 Titrations of 4 with $\text{But}_4\text{NBr}$ in various solvents

a)

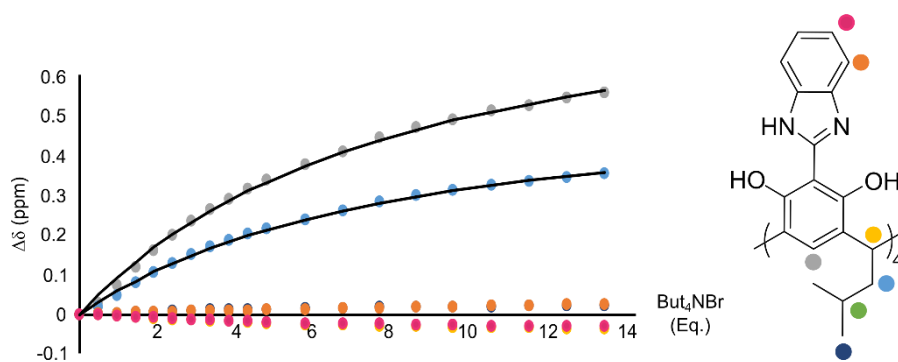

| K                   | error | SSR        |
|---------------------|-------|------------|
| $68 \text{ M}^{-1}$ | 0.9%  | 0.00185557 |

<http://app.supramolecular.org/bindfit/view/b8e4ef57-a2cd-4ddf-80e2-f33ed77a775a>

b)

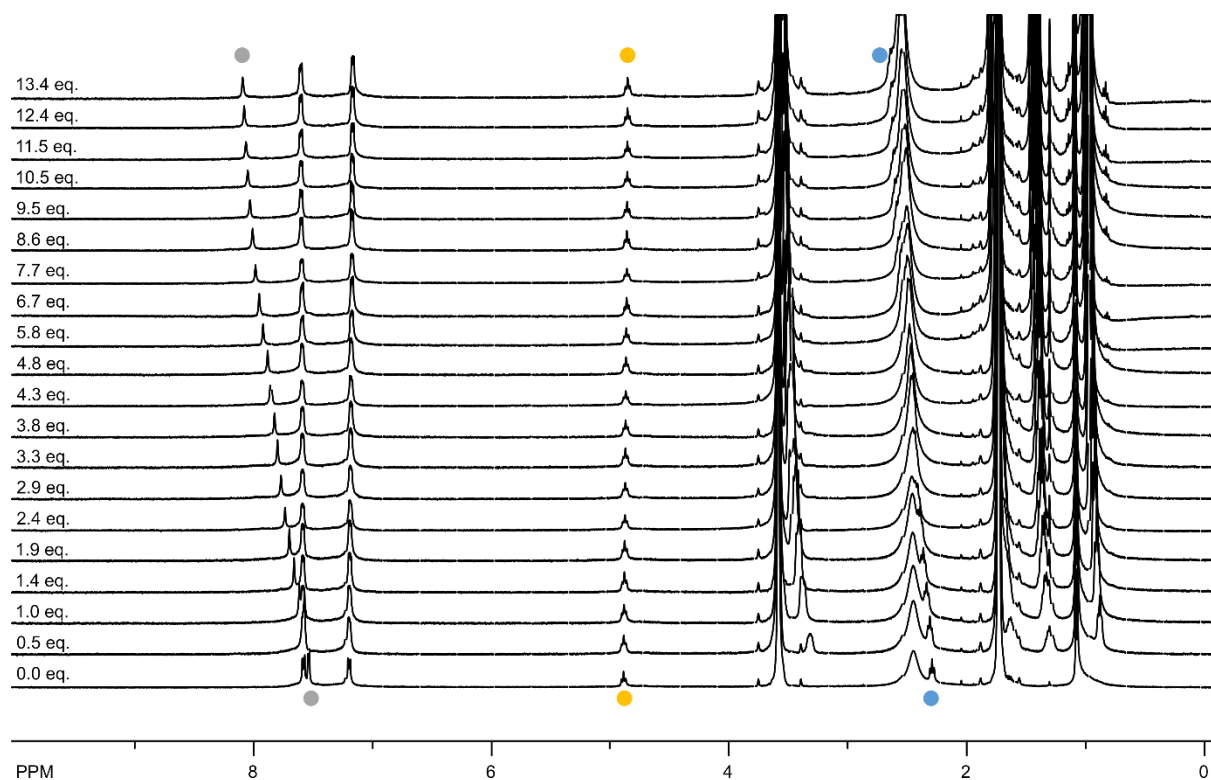

**Figure S14.**  $^1\text{H}$  NMR titration of **4** ( $C = 2 \text{ mM}$ ) with  $\text{But}_4\text{NBr}$  in  $[\text{D}_8]\text{THF}$ : a) experimental points and fitted curves (black lines, fitted using Bindfit); b)  $^1\text{H}$  NMR spectra (400 MHz, 303 K).

a)

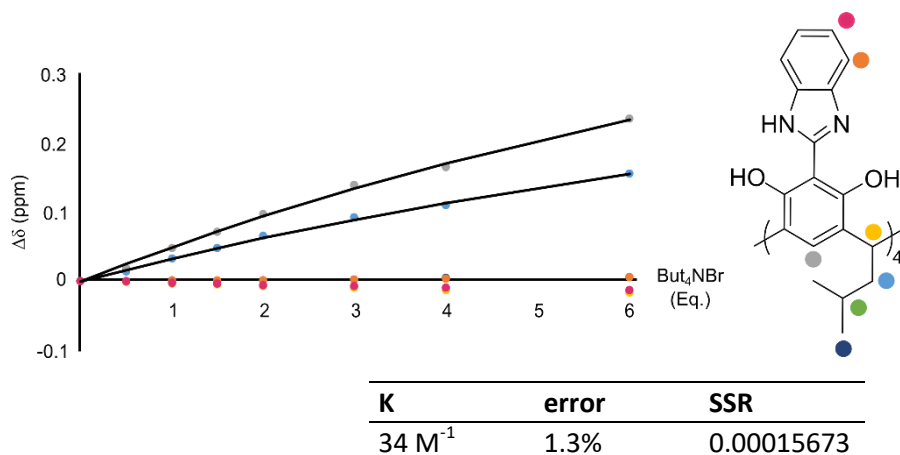

<http://app.supramolecular.org/bindfit/view/f70b4b83-42ba-4059-b69e-0a8c92de0709>

b)

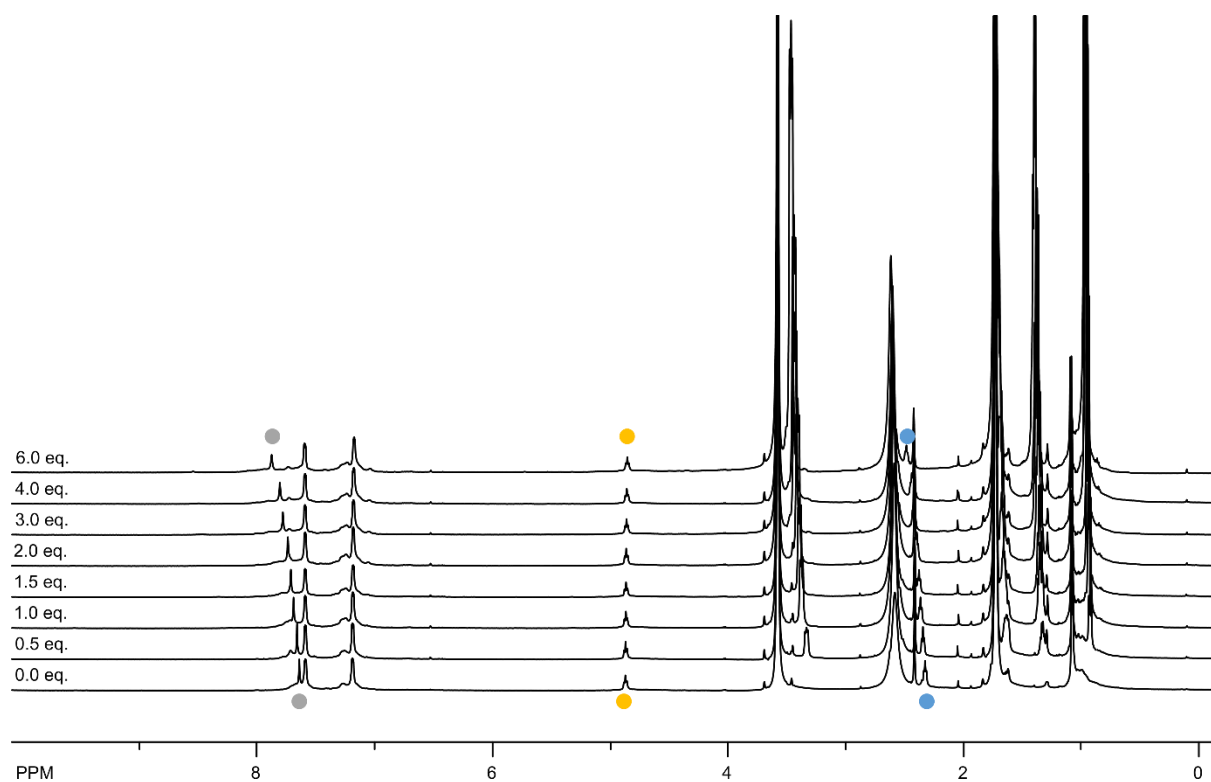

**Figure S15.**  $^1\text{H}$  NMR titration of **4** ( $C = 2 \text{ mM}$ ) with  $\text{But}_4\text{NBr}$  in 98:2 ( $v:v$ )  $[\text{D}_8]\text{THF}:[\text{D}_6]\text{DMSO}$ : a) experimental points and fitted curves (black lines, fitted using Bindfit); b)  $^1\text{H}$  NMR spectra (600 MHz, 298 K).

### 3.2 Titrations of 5 with But<sub>4</sub>NX in various solvents

a)

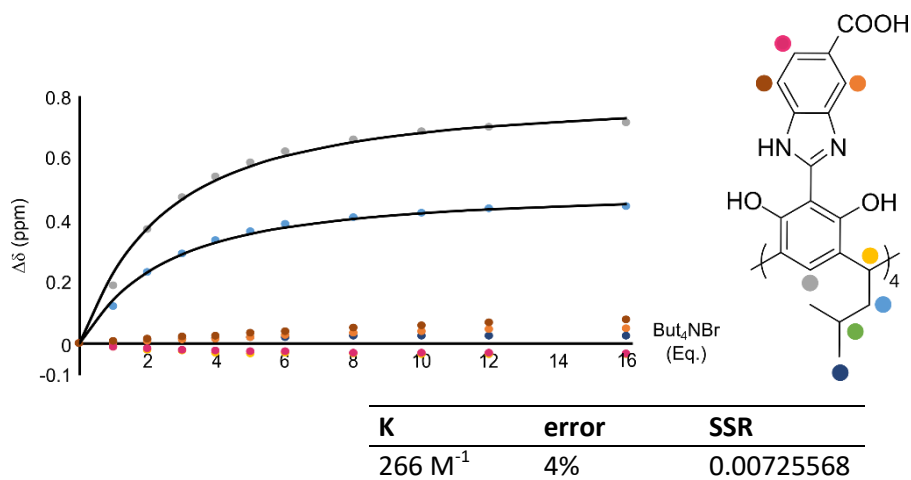

<http://app.supramolecular.org/bindfit/view/de374a4e-169b-4f76-86ad-dfc1d50c5edc>

b)

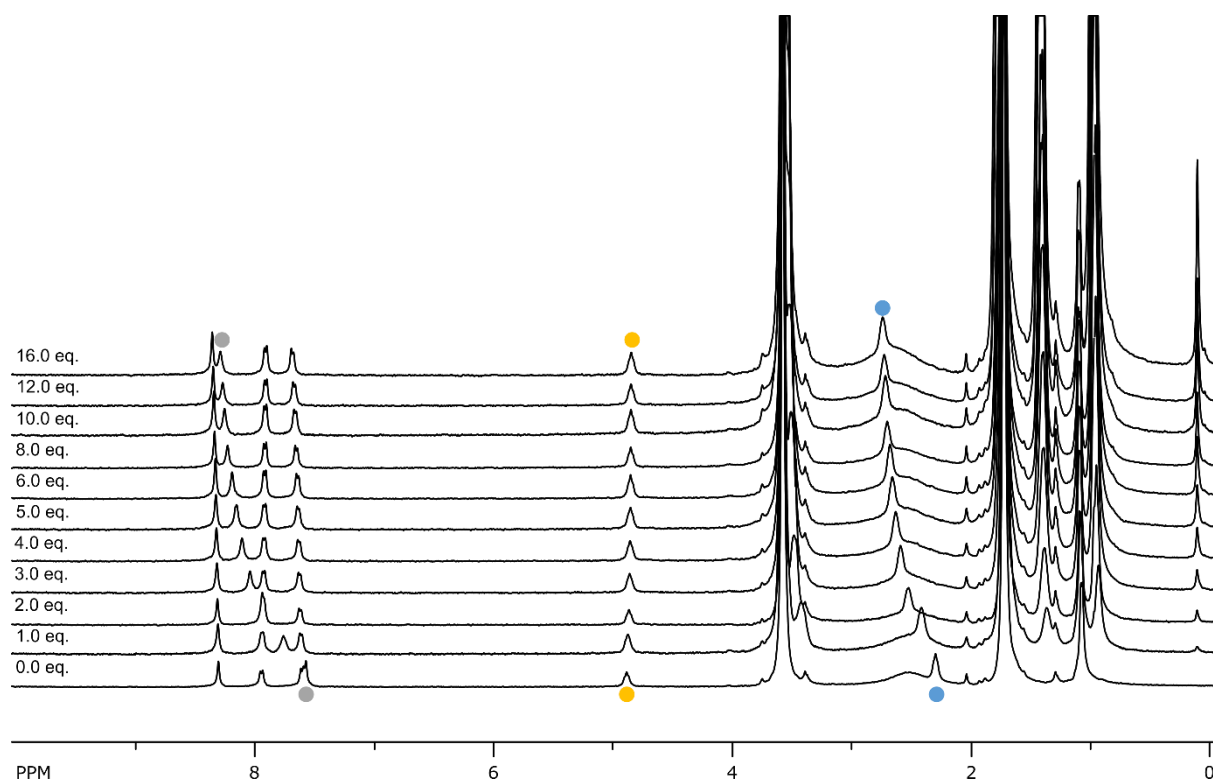

**Figure S16.** <sup>1</sup>H NMR titration of 5 (C = 2 mM) with But<sub>4</sub>NBr in [D<sub>8</sub>]THF: a) experimental points and fitted curves (black lines, fitted using Bindfit); b) <sup>1</sup>H NMR spectra (400 MHz, 303 K).

### 3.3 Titrations of 6 with But<sub>4</sub>NX in various solvents

a)

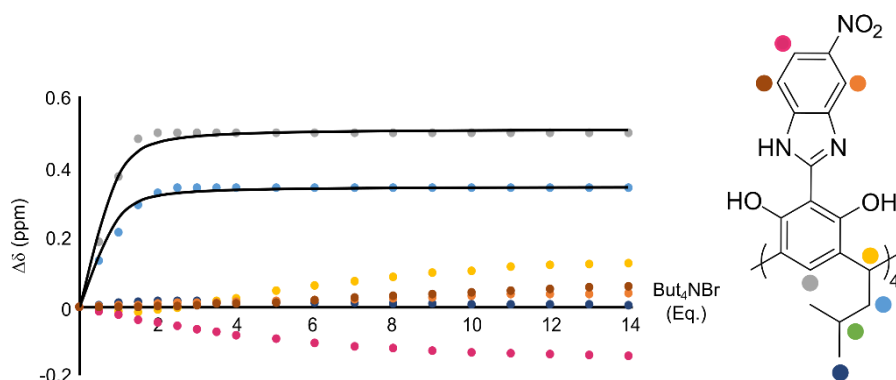

| K                    | error | SSR        |
|----------------------|-------|------------|
| 6000 M <sup>-1</sup> | 24%   | 0.00681759 |

<http://app.supramolecular.org/bindfit/view/a2695f96-266a-4a14-82c7-e028c2c92365>

b)

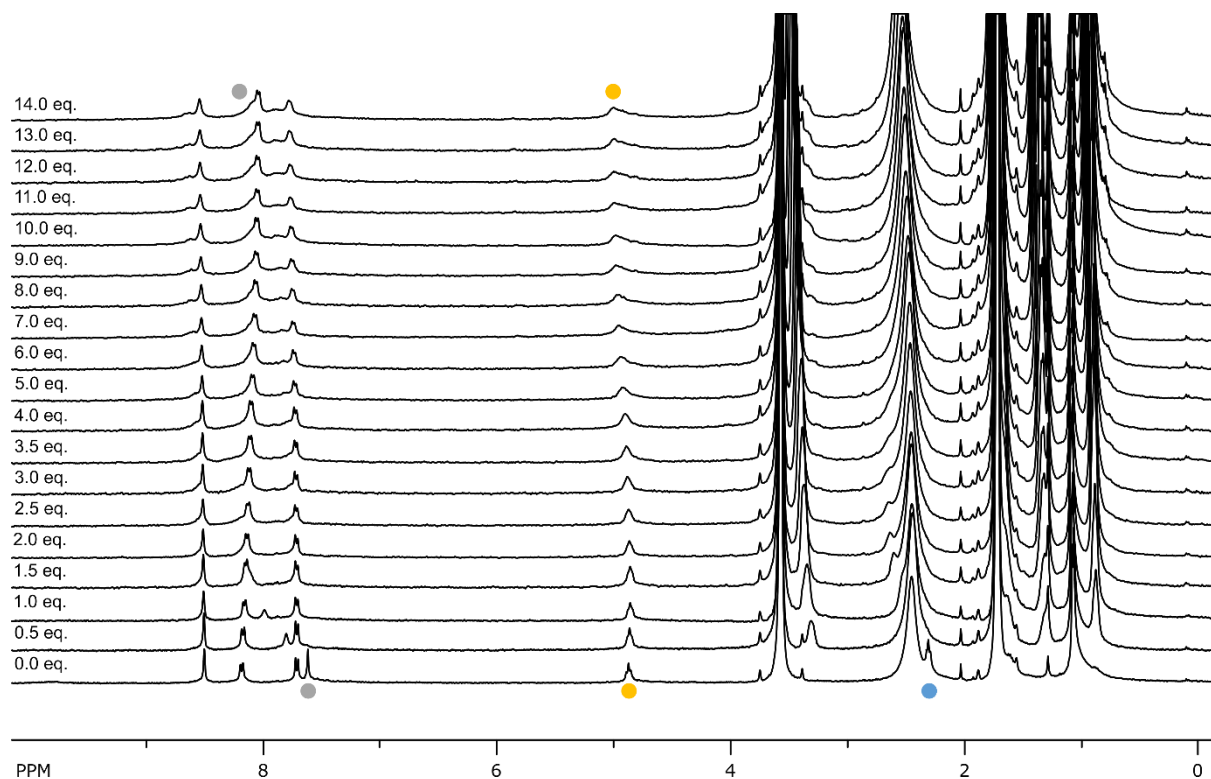

**Figure S17.** <sup>1</sup>H NMR titration of **6** (C = 2 mM) with But<sub>4</sub>NBr in [D<sub>8</sub>]THF: a) experimental points and fitted curves (black lines, fitted using Bindfit); b) <sup>1</sup>H NMR spectra (400 MHz, 303 K).

a)

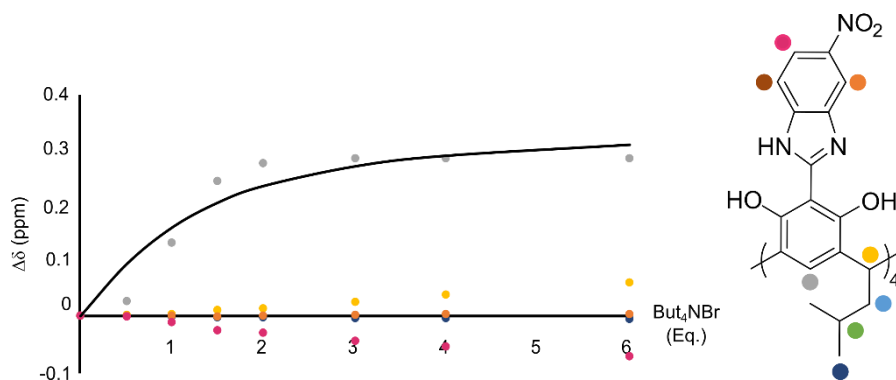

| K                    | error | SSR        |
|----------------------|-------|------------|
| $780 \text{ M}^{-1}$ | 24%   | 0.01194784 |

<http://app.supramolecular.org/bindfit/view/65d1e613-7d5a-417c-9c61-7e684d9ea6ca>

b)

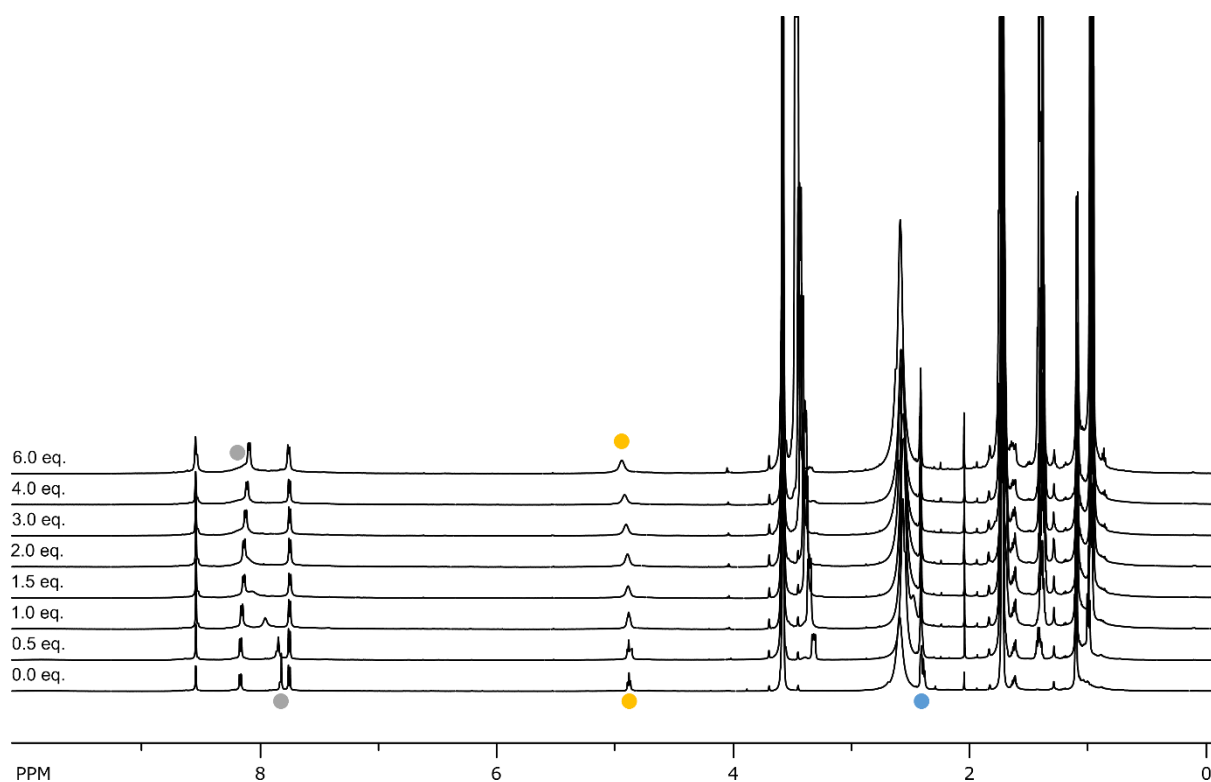

**Figure S18.**  $^1\text{H}$  NMR titration of **6** ( $C = 2 \text{ mM}$ ) with  $\text{But}_4\text{NBr}$  in 98:2 (v:v)  $[\text{D}_8]\text{THF}:[\text{D}_6]\text{DMSO}$ : a) experimental points and fitted curves (black lines, fitted using Bindfit); b)  $^1\text{H}$  NMR spectra (600 MHz, 298 K).

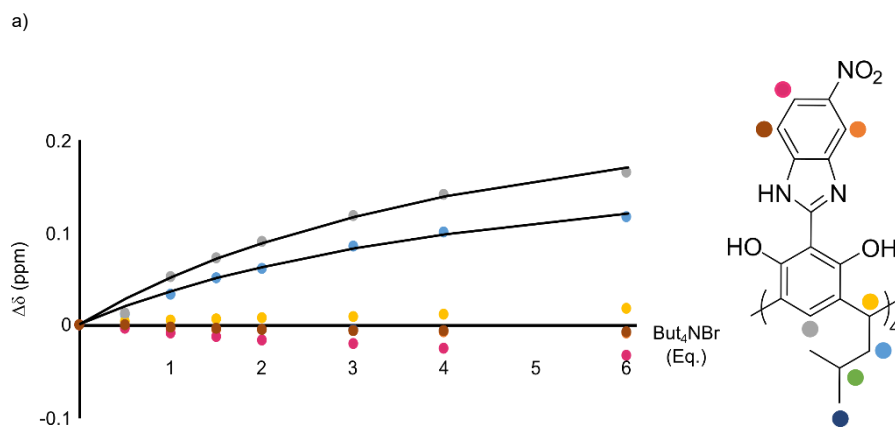

| K                   | error | SSR       |
|---------------------|-------|-----------|
| 124 M <sup>-1</sup> | 3%    | 0.0003778 |

<http://app.supramolecular.org/bindfit/view/24996170-1e72-432a-9805-9d7d8f2987c0>

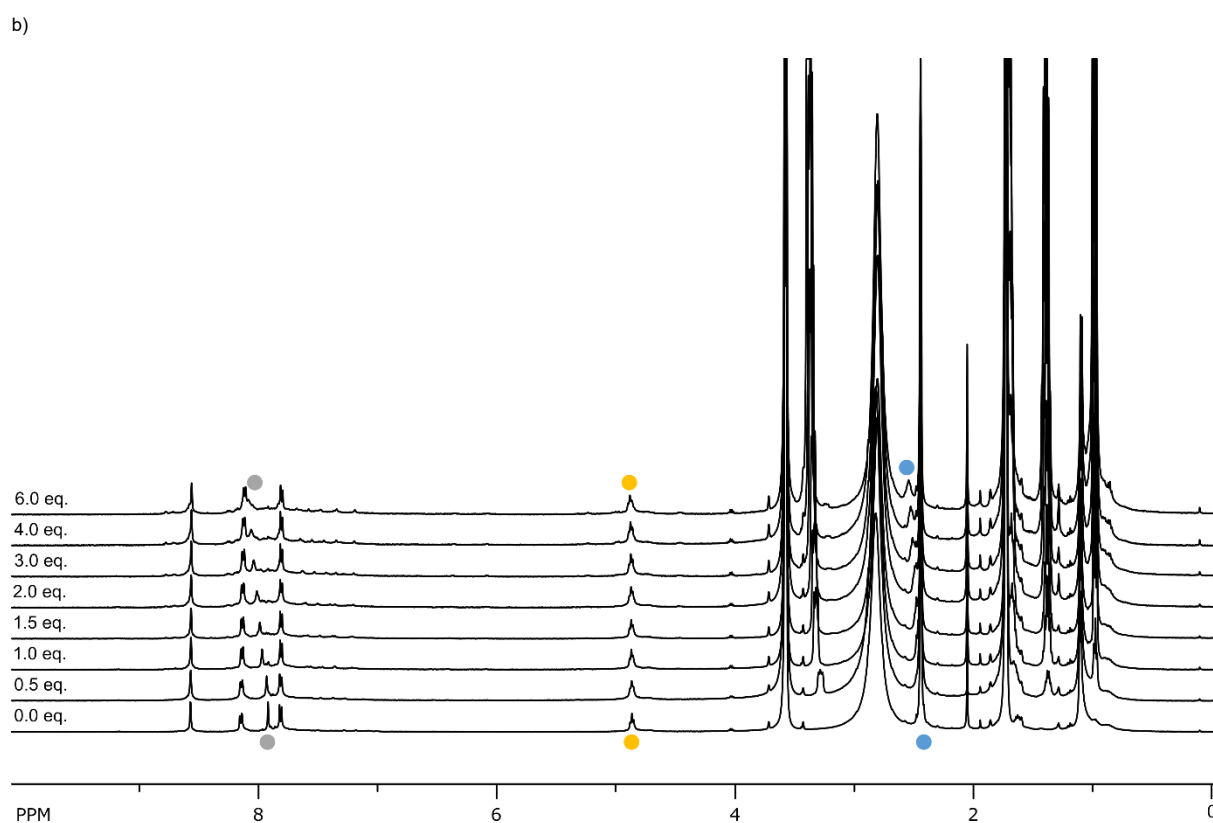

**Figure S19.** <sup>1</sup>H NMR titration of **6** (C = 2 mM) with But<sub>4</sub>NBr in 90:10 (v:v) [D<sub>8</sub>]THF:[D<sub>6</sub>]DMSO: a) experimental points and fitted curves (black lines, fitted using Bindfit); b) <sup>1</sup>H NMR spectra (500 MHz, 298 K).



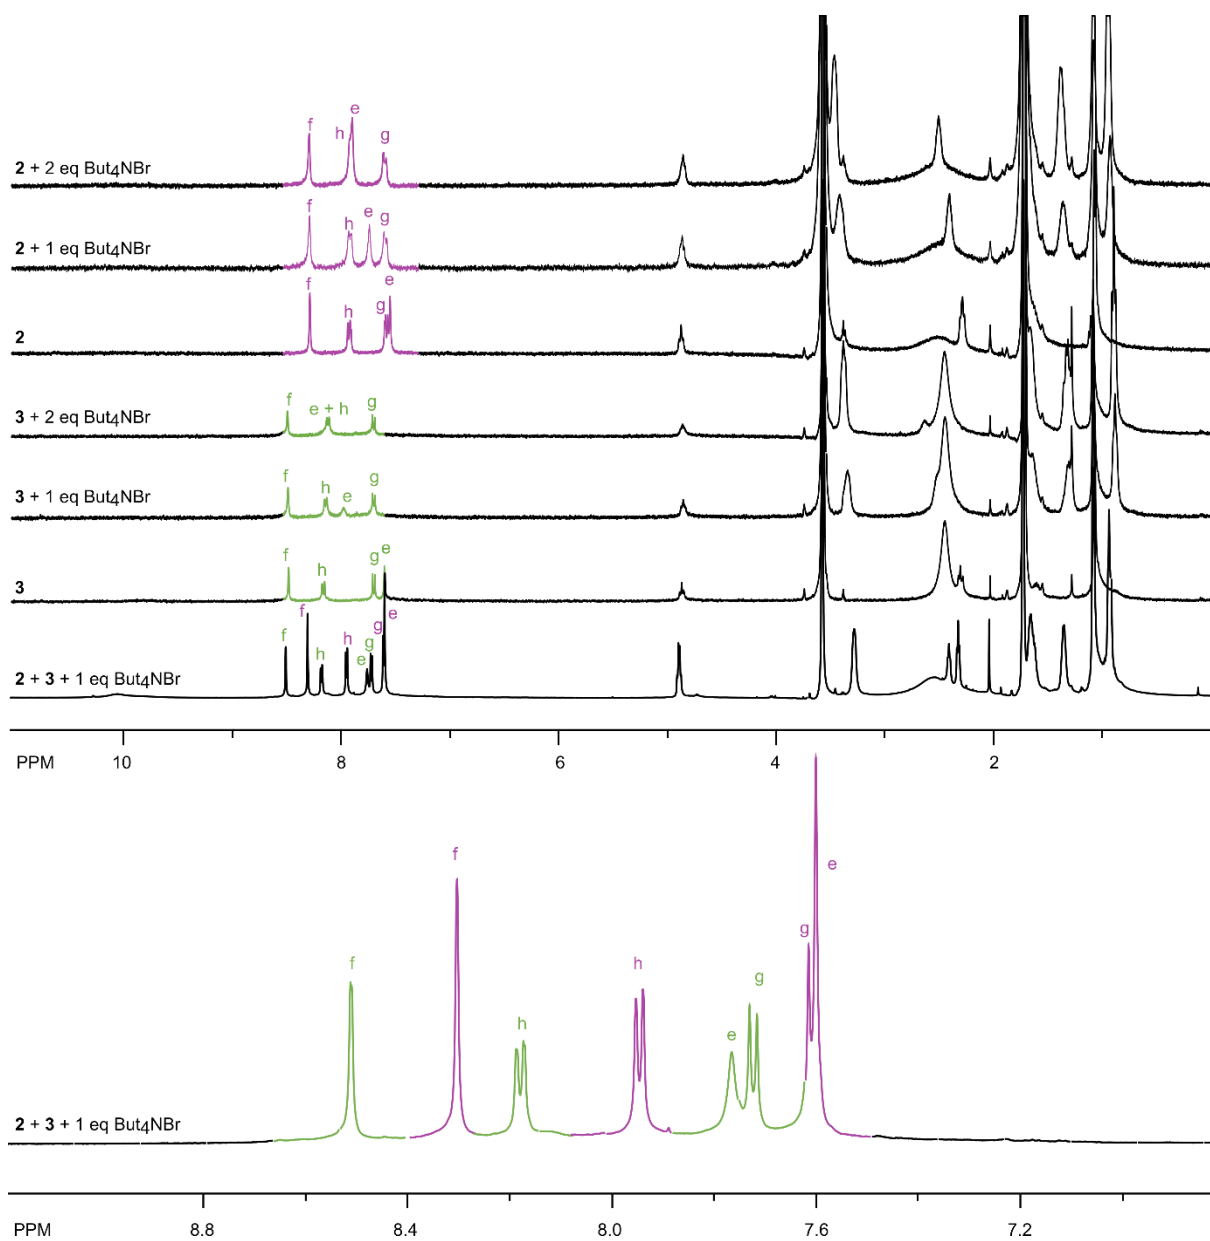

**Figure S20.**  $^1\text{H}$  NMR spectra of **5** and **6** (C = 2 mM each) with  $\text{But}_4\text{NBr}$ , ( $[\text{D}_8]\text{THF}$ , 600 MHz, 298 K).

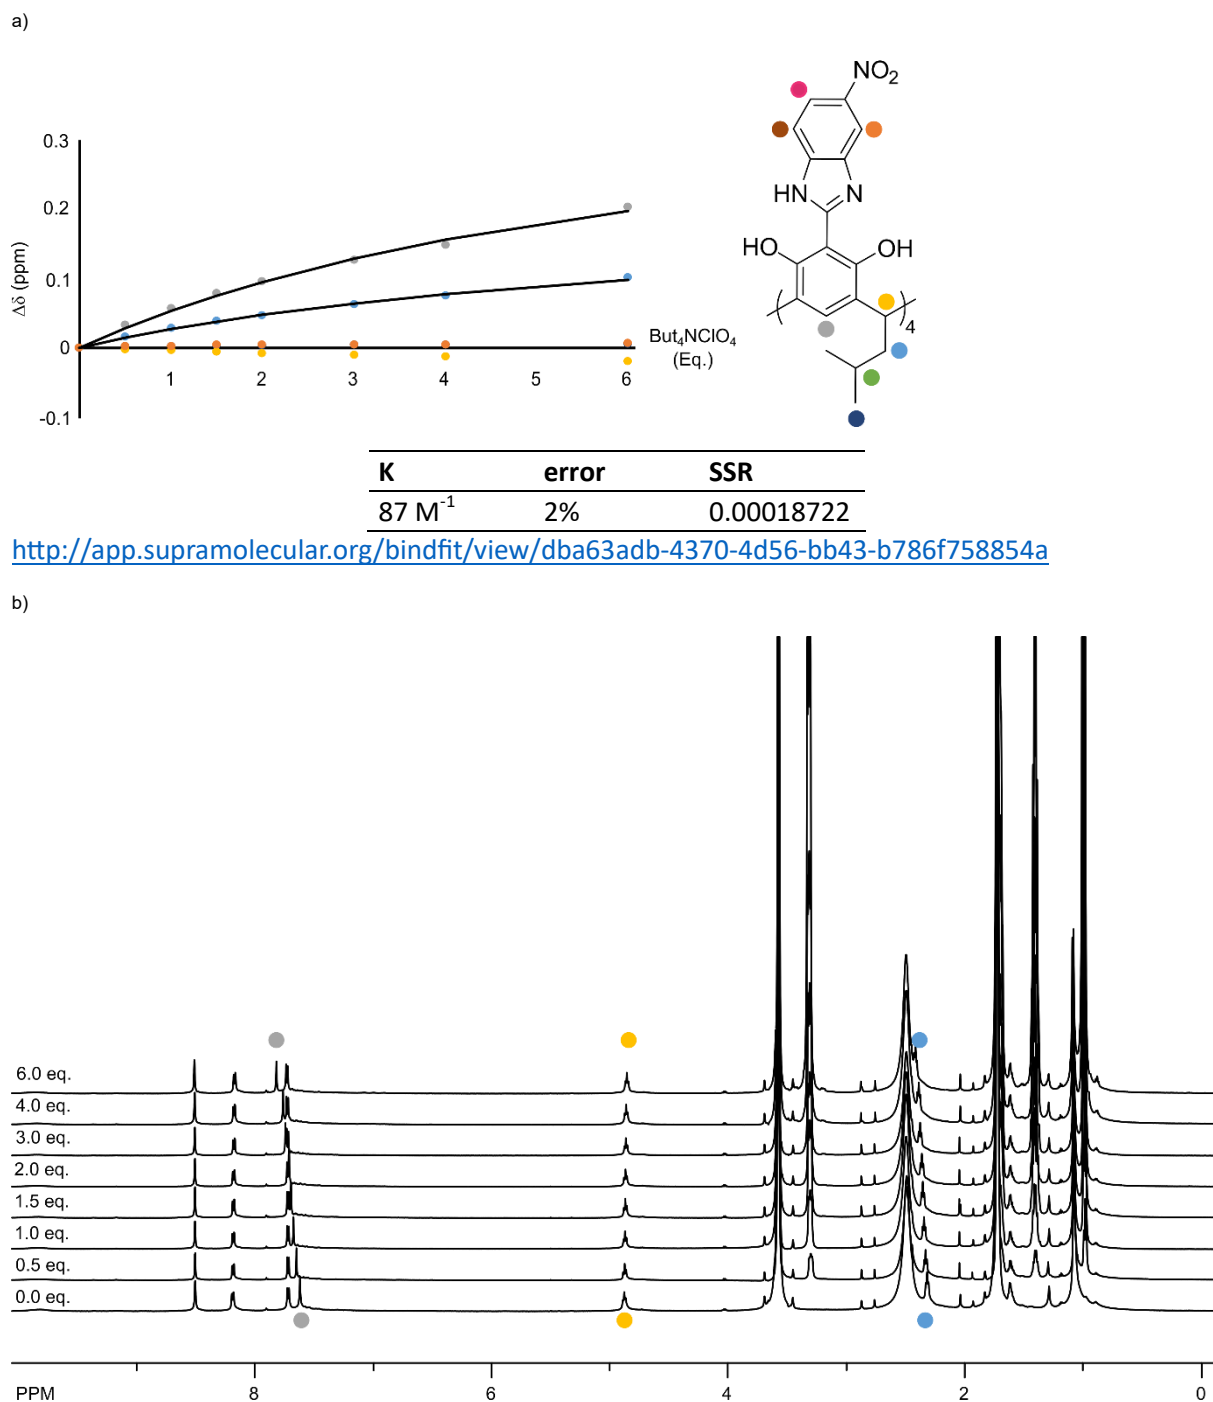

**Figure S21.**  $^1\text{H}$  NMR titration of **6** ( $C = 2 \text{ mM}$ ) with  $\text{But}_4\text{NClO}_4$  in  $[\text{D}_8]\text{THF}$ : a) experimental points and fitted curves (black lines, fitted using Bindfit); b)  $^1\text{H}$  NMR spectra (600 MHz, 298 K).

### 3.4 Titrations of **8** with But<sub>4</sub>NX in various solvents

a)

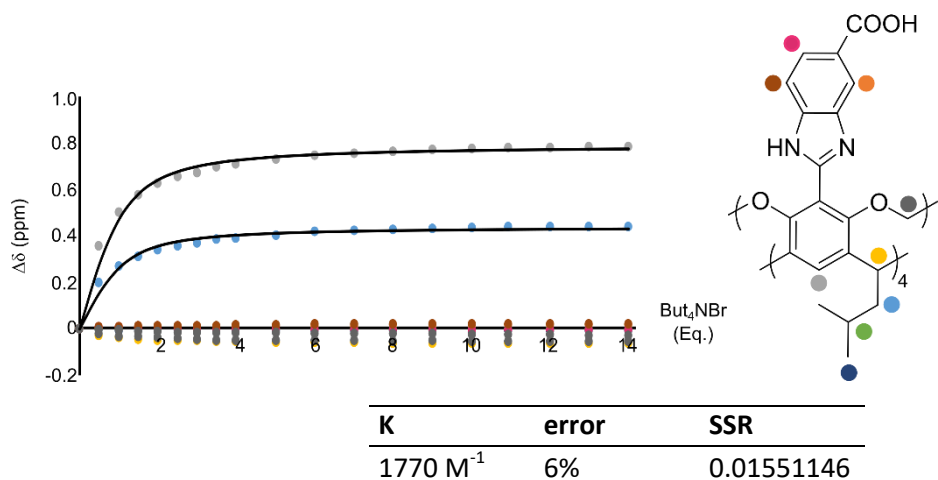

b)

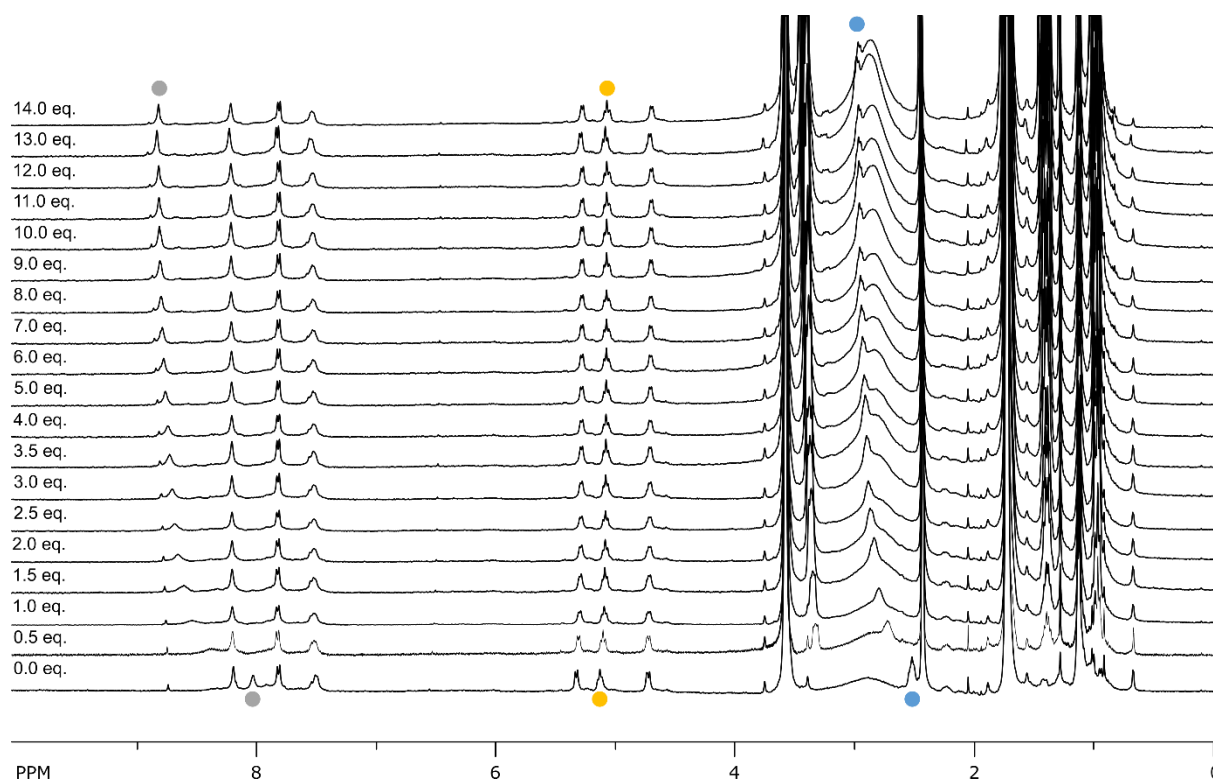

**Figure S22.** <sup>1</sup>H NMR titration of **8** (C = 2 mM) with But<sub>4</sub>NBr in 90:10 (v:v) [D<sub>8</sub>]THF:[D<sub>6</sub>]DMSO: a) experimental points and fitted curves (black lines, fitted using Bindfit); b) <sup>1</sup>H NMR spectra (400 MHz).

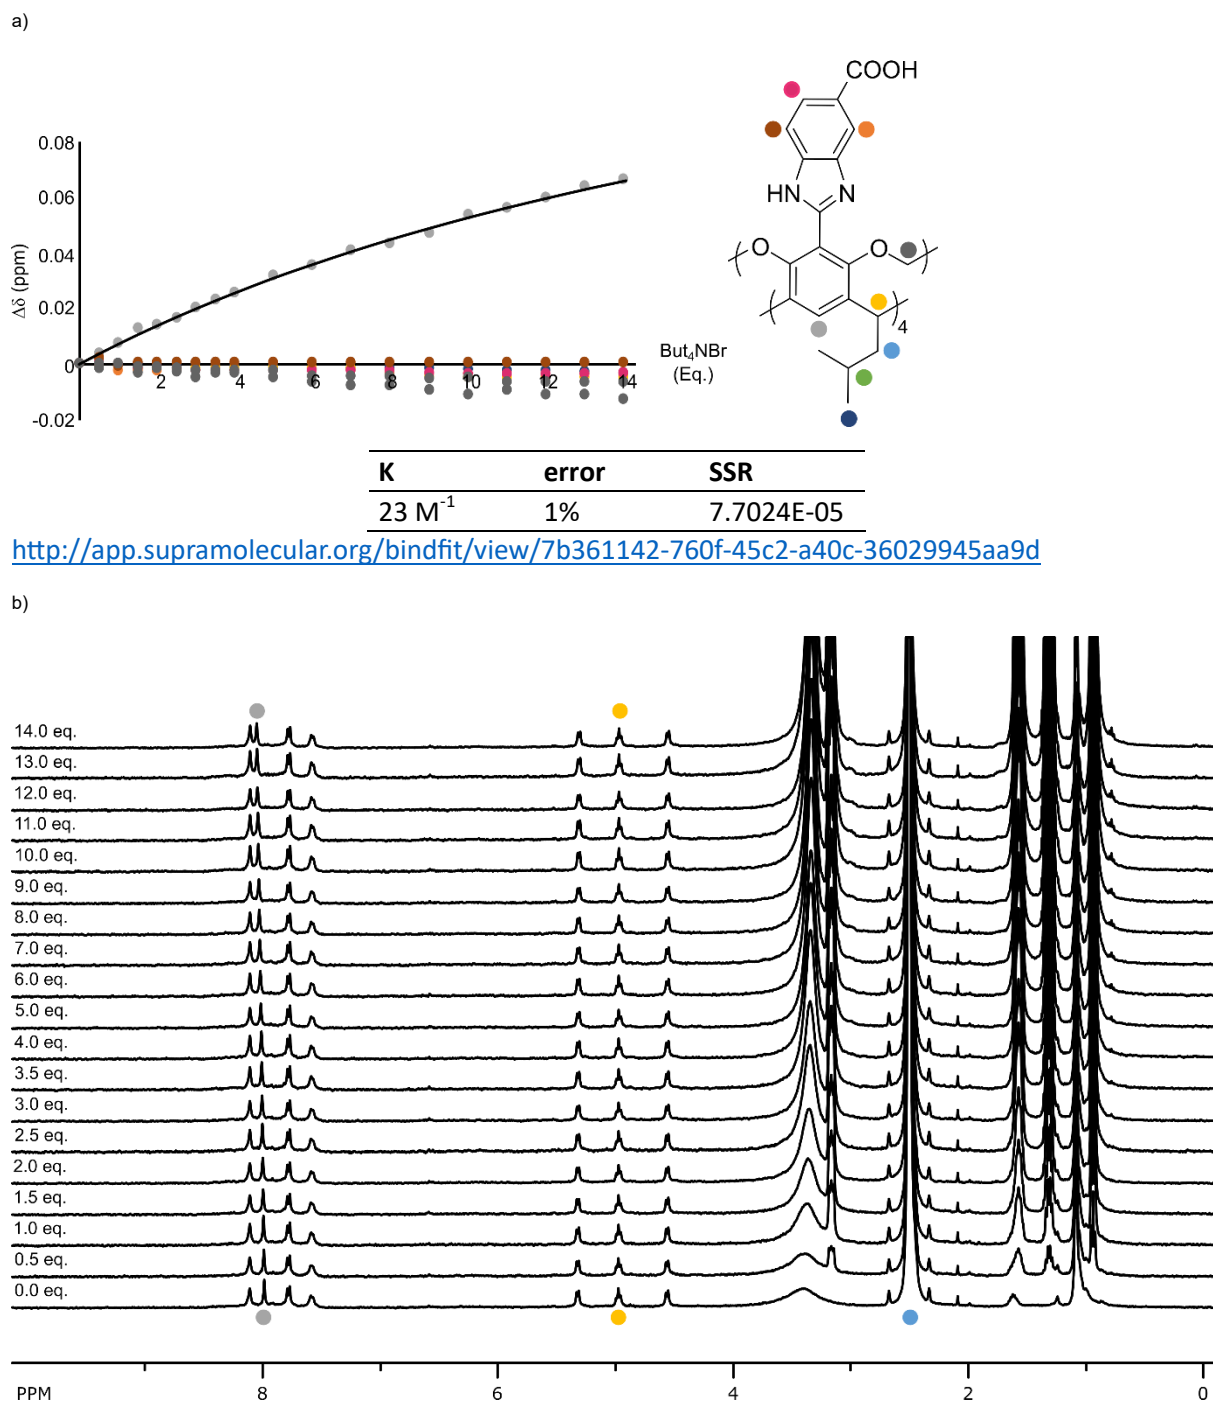

**Figure S23.** <sup>1</sup>H NMR titration of **8** (C = 2 mM) with But<sub>4</sub>NBr in [D<sub>6</sub>]DMSO: a) experimental points and fitted curves (black lines, fitted using Bindfit); b) <sup>1</sup>H NMR spectra (400 MHz, 303 K).

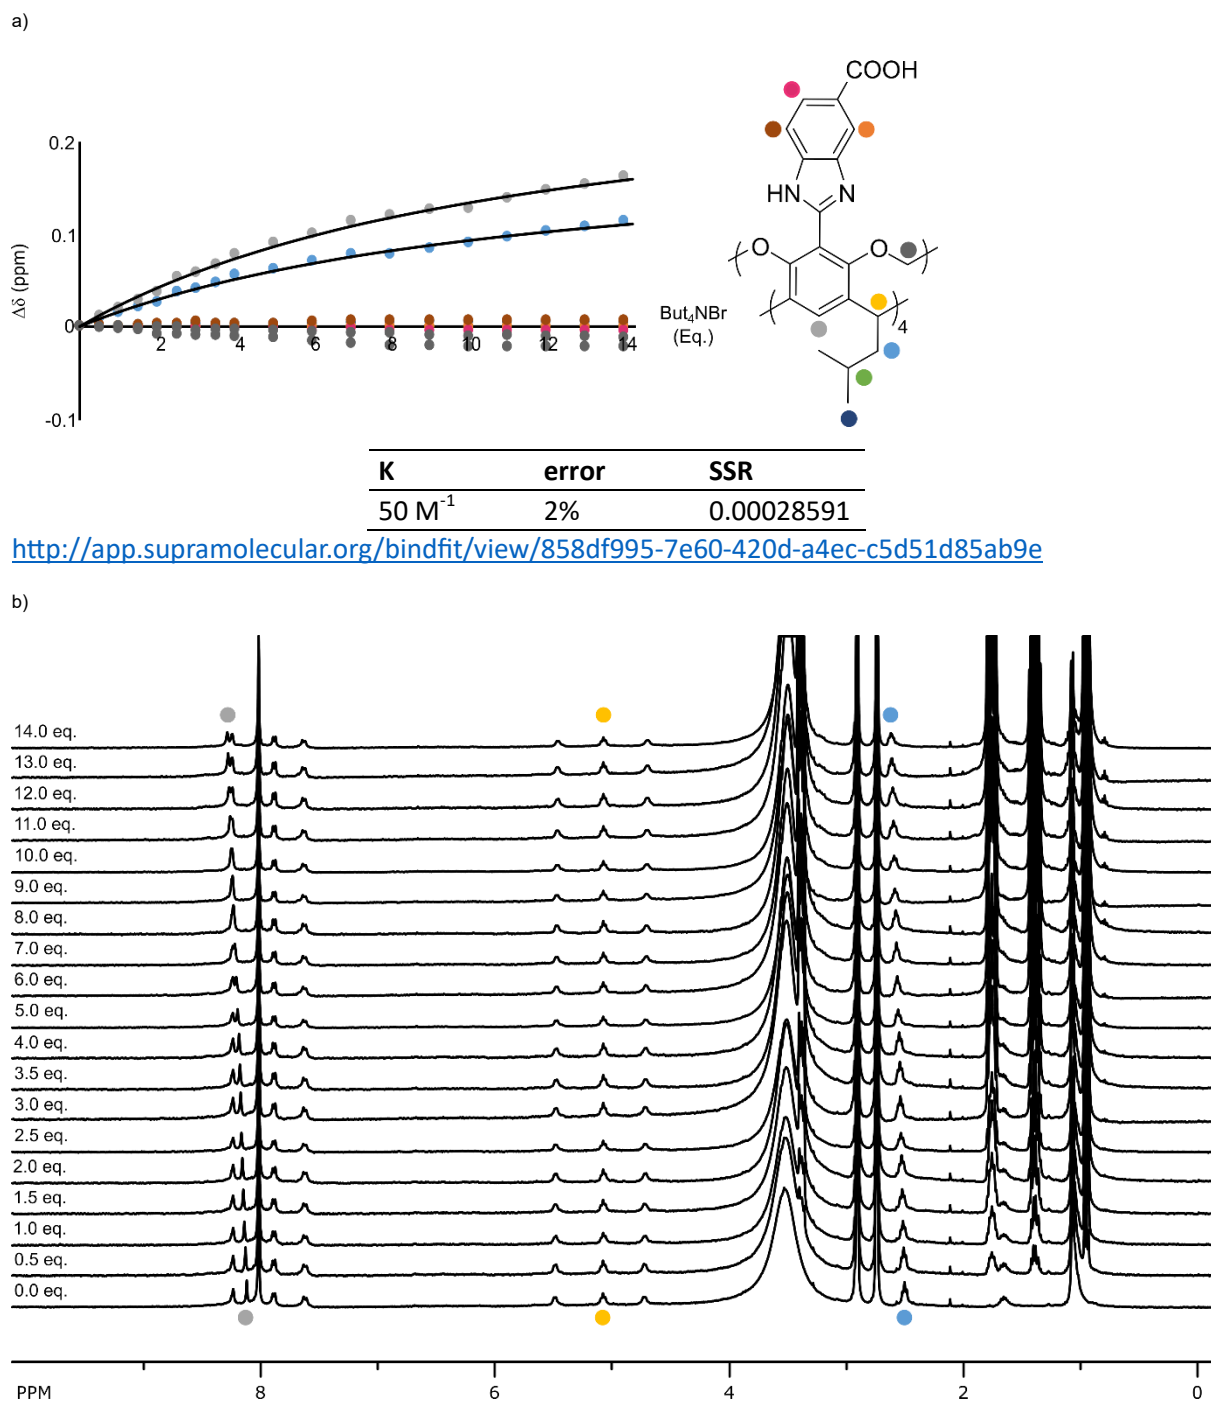

**Figure S24.** <sup>1</sup>H NMR titration of **8** (C = 2 mM) with But<sub>4</sub>NBr in [D<sub>7</sub>]DMF: a) experimental points and fitted curves (black lines, fitted using Bindfit); b) <sup>1</sup>H NMR spectra (400 MHz, 303 K).

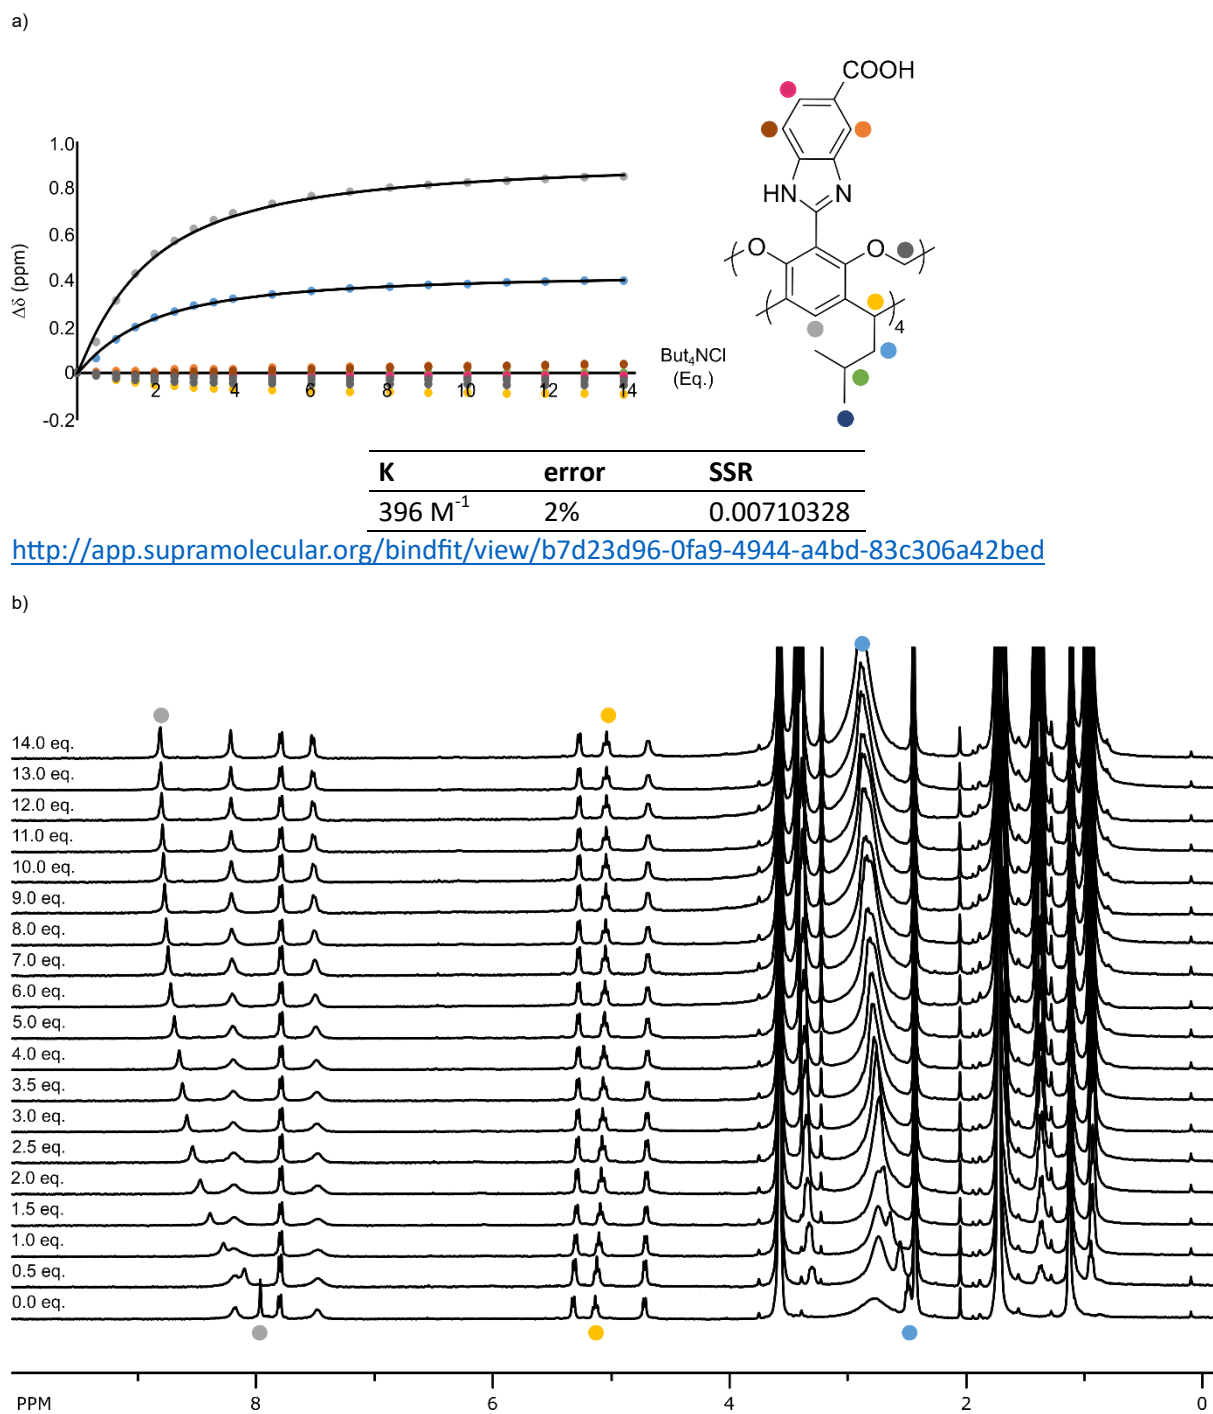

**Figure S25.** <sup>1</sup>H NMR titration of **8** (C = 2 mM) with But<sub>4</sub>NCl in 90:10 (v:v) [D<sub>8</sub>]THF:[D<sub>6</sub>]DMSO: a) experimental points and fitted curves (black lines, fitted using Bindfit); b) <sup>1</sup>H NMR spectra (400 MHz, 303 K).



### 3.5 Titrations of 9 with But<sub>4</sub>NX in various solvents

a)

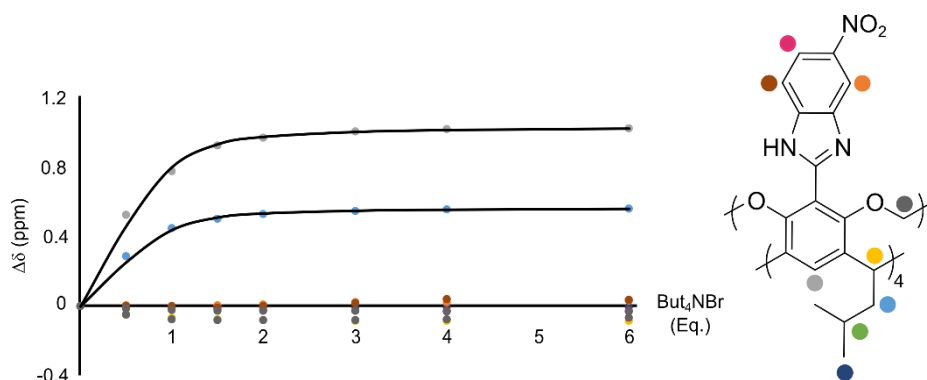

| K                    | error | SSR         |
|----------------------|-------|-------------|
| 7000 M <sup>-1</sup> | 14%   | 0,008858681 |

<http://app.supramolecular.org/bindfit/view/ca42f4f7-799c-43ec-8be3-1ce1fb948e60>

b)

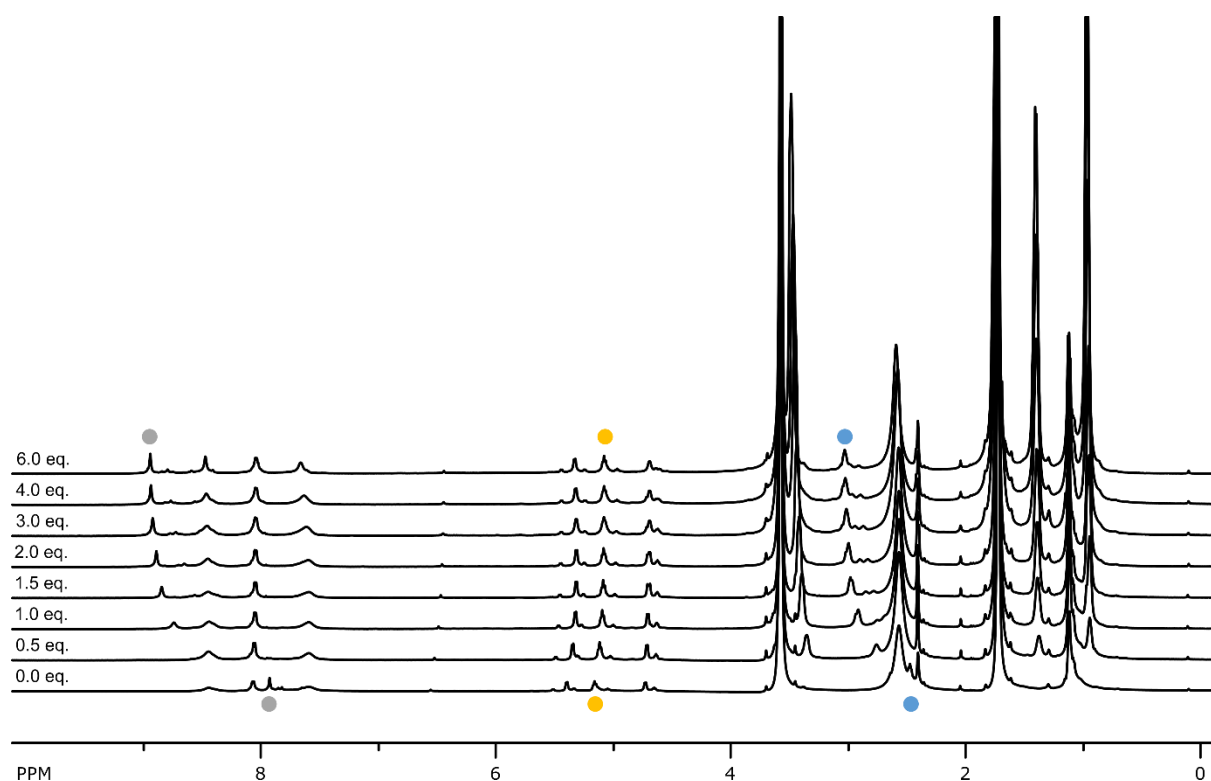

**Figure S27.** <sup>1</sup>H NMR titration of **9** (C = 2 mM) with But<sub>4</sub>NBr in 98:2 (v:v) [D<sub>8</sub>]THF:[D<sub>6</sub>]DMSO: a) experimental points and fitted curves (black lines, fitted using Bindfit); b) <sup>1</sup>H NMR spectra (600 MHz, 298 K).



a)

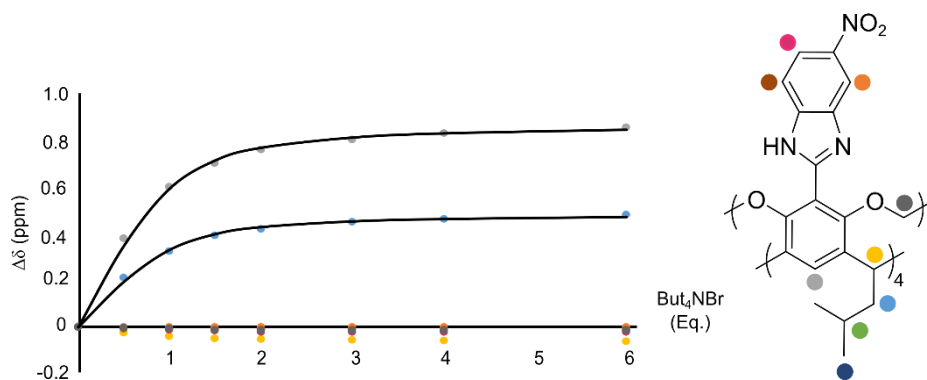

| K                    | error | SSR        |
|----------------------|-------|------------|
| 3363 M <sup>-1</sup> | 6%    | 0.00198003 |

<http://app.supramolecular.org/bindfit/view/6fb98fab-8055-419a-b2fa-fbe92e79550d>

b)

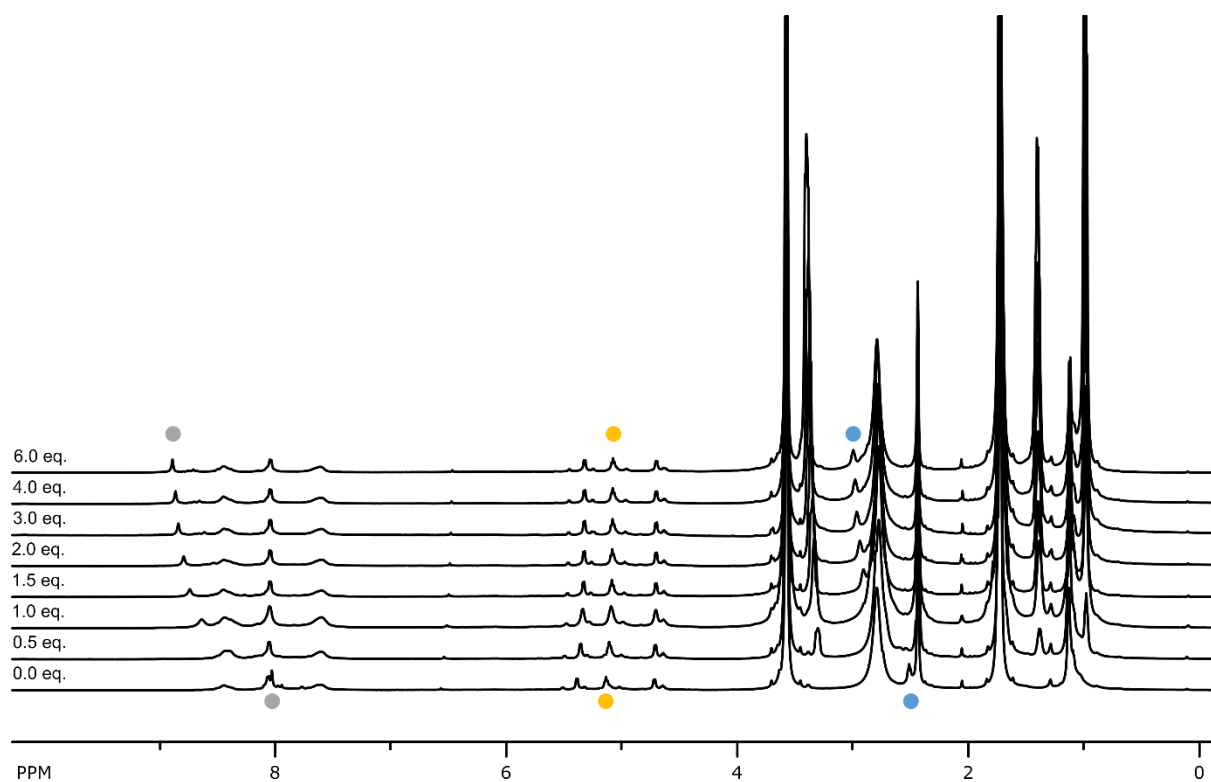

**Figure S28.** <sup>1</sup>H NMR titration of **9** (C = 2 mM) with But<sub>4</sub>NBr in 90:10 (v:v) [D<sub>8</sub>]THF:[D<sub>6</sub>]DMSO: a) experimental points and fitted curves (black lines, fitted using Bindfit); b) <sup>1</sup>H NMR spectra (600 MHz, 298 K).

a)

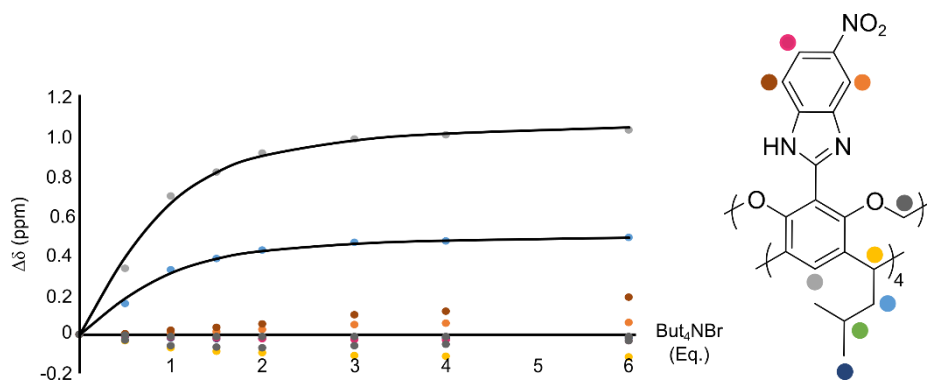

| K                    | error | SSR        |
|----------------------|-------|------------|
| 1900 M <sup>-1</sup> | 11%   | 0.02435714 |

<http://app.supramolecular.org/bindfit/view/2ae6d39e-c25f-4035-9c20-e6d0cd60a2bd>

b)

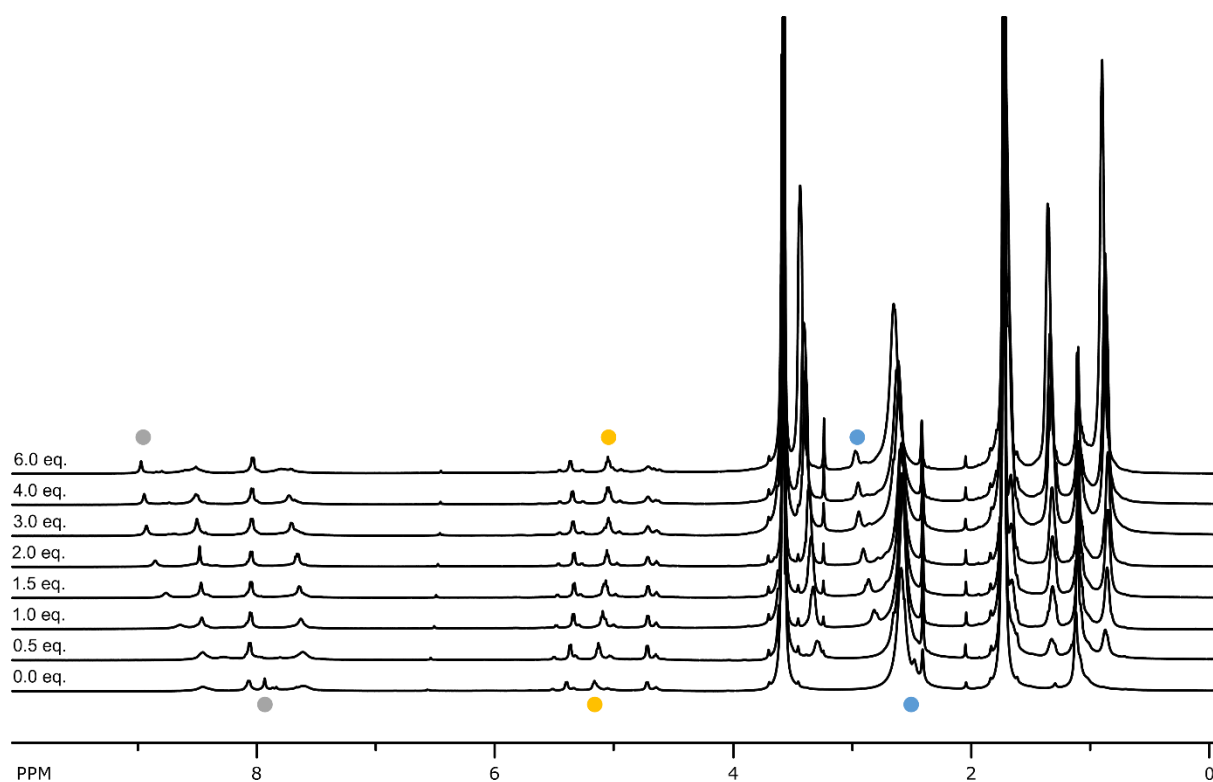

**Figure S29.** <sup>1</sup>H NMR titration of **9** (C = 2 mM) with But<sub>4</sub>NCl in 98:2 (v:v) [D<sub>8</sub>]THF:[D<sub>6</sub>]DMSO: a) experimental points and fitted curves (black lines, fitted using Bindfit); b) <sup>1</sup>H NMR spectra (600 MHz, 298 K).

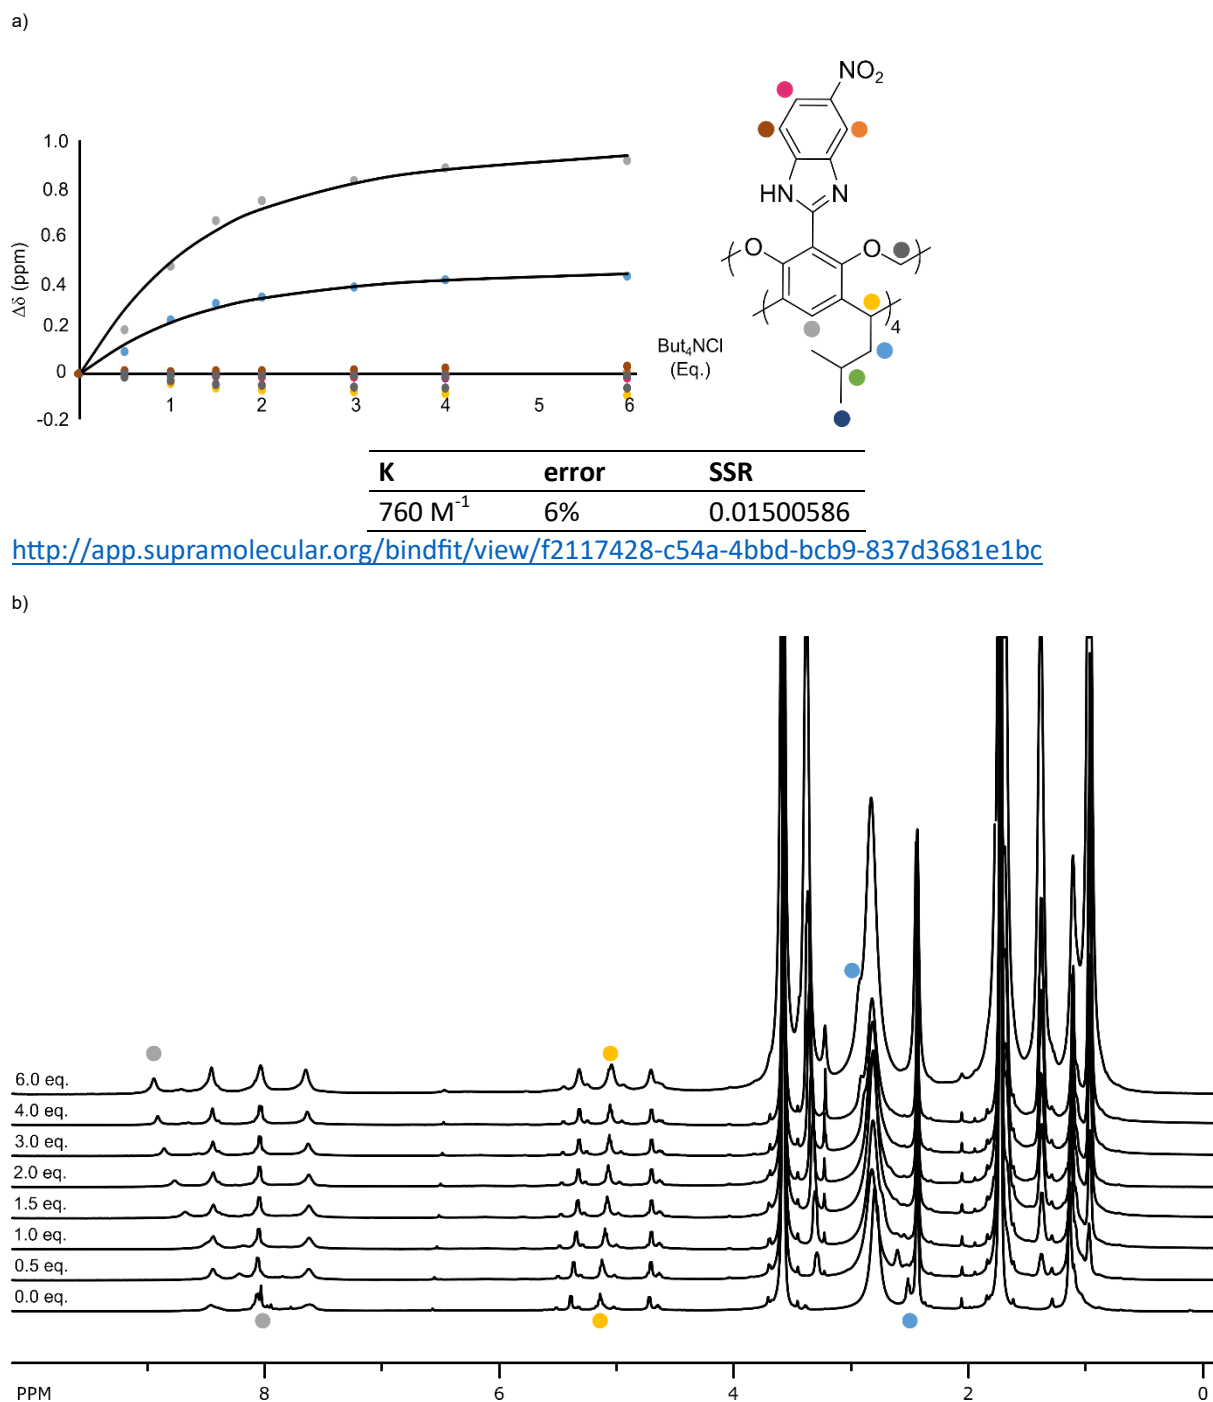

**Figure S30.** <sup>1</sup>H NMR titration of **9** (C = 2 mM) with But<sub>4</sub>NCl in 90:10 (v:v) [D<sub>8</sub>]THF:[D<sub>6</sub>]DMSO: a) experimental points and fitted curves (black lines, fitted using Bindfit); b) <sup>1</sup>H NMR spectra (600 MHz, 298 K).

a)

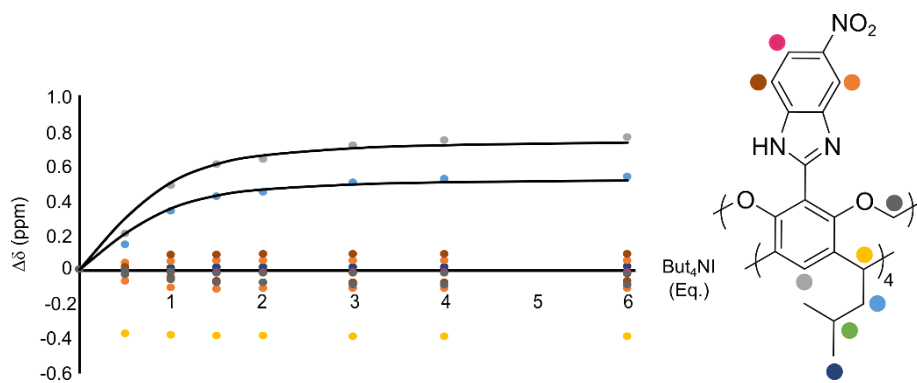

| K                    | error | SSR       |
|----------------------|-------|-----------|
| 2900 M <sup>-1</sup> | 23%   | 0.0693411 |

<http://app.supramolecular.org/bindfit/view/49a3e702-8e39-4a16-9960-a791c9ff961e>

b)

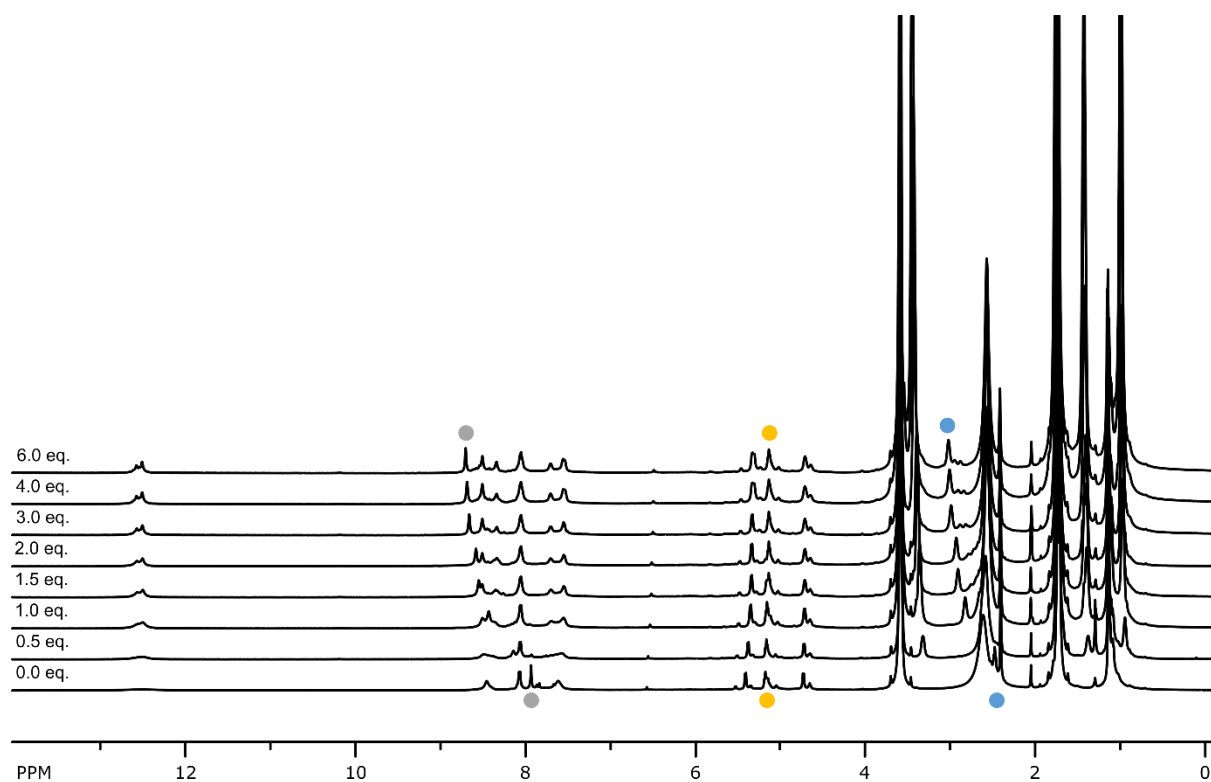

**Figure S31.** <sup>1</sup>H NMR titration of **9** (C = 2 mM) with But<sub>4</sub>NI in 98:2 (v:v) [D<sub>8</sub>]THF:[D<sub>6</sub>]DMSO: a) experimental points and fitted curves (black lines, fitted using Bindfit); b) <sup>1</sup>H NMR spectra (600 MHz, 298 K).

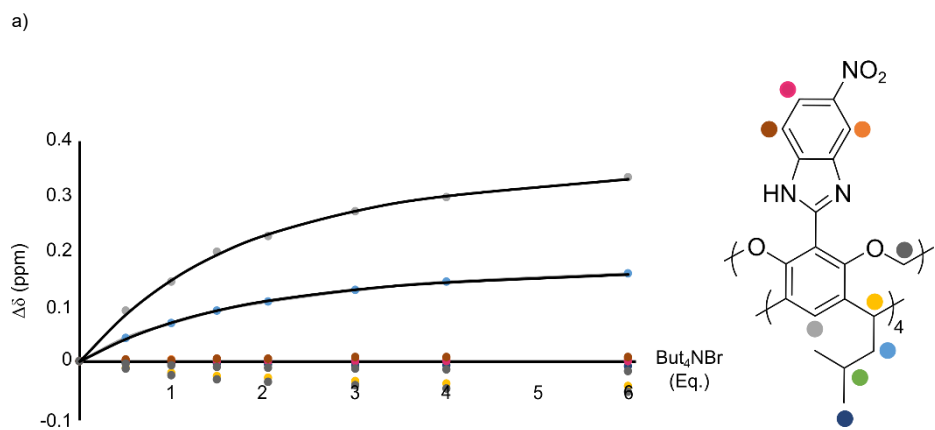

| K                   | error | SSR        |
|---------------------|-------|------------|
| 450 M <sup>-1</sup> | 2%    | 0.00016448 |

<http://app.supramolecular.org/bindfit/view/0c0b2875-83cf-434c-9181-bf6ee26907d0>

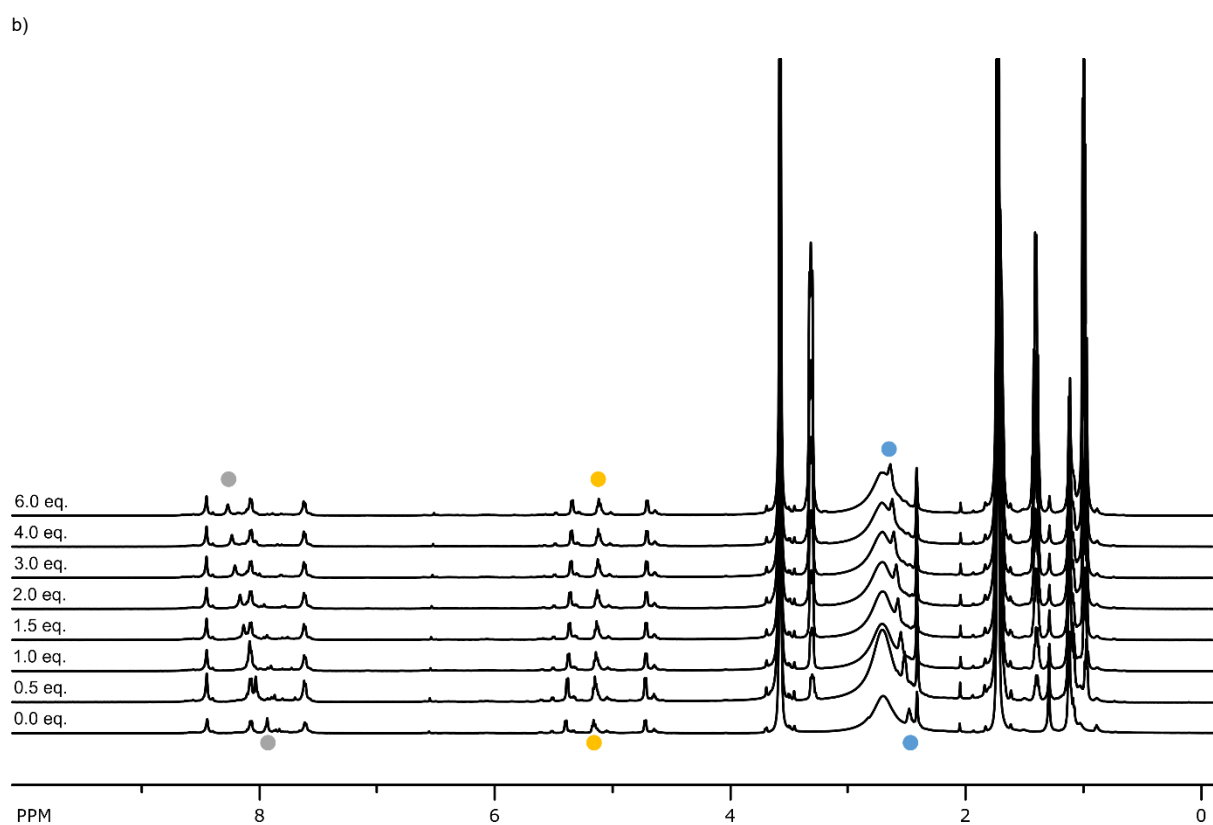

**Figure S32.** <sup>1</sup>H NMR titration of **9** (C = 2 mM) with But<sub>4</sub>NClO<sub>4</sub> in 98:2 (v:v) [D<sub>8</sub>]THF:[D<sub>6</sub>]DMSO: a) experimental points and fitted curves (black lines, fitted using Bindfit); b) <sup>1</sup>H NMR spectra (600 MHz, 298 K).

#### 4. Comparison of Cl<sup>-</sup> and Br<sup>-</sup> complexation by receptor **6** and VT NMR spectra

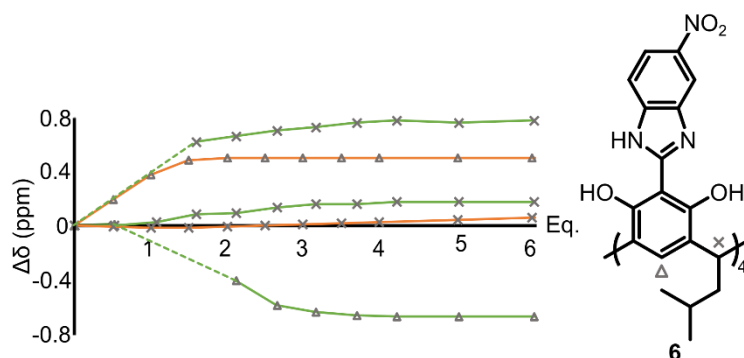

**Figure S33.** Changes in chemical shifts observed during titration of **6** (C = 2 mM) with But<sub>4</sub>NCl (—x—, dashed lines in the area where signals were not visible) or But<sub>4</sub>NBr (—△—)

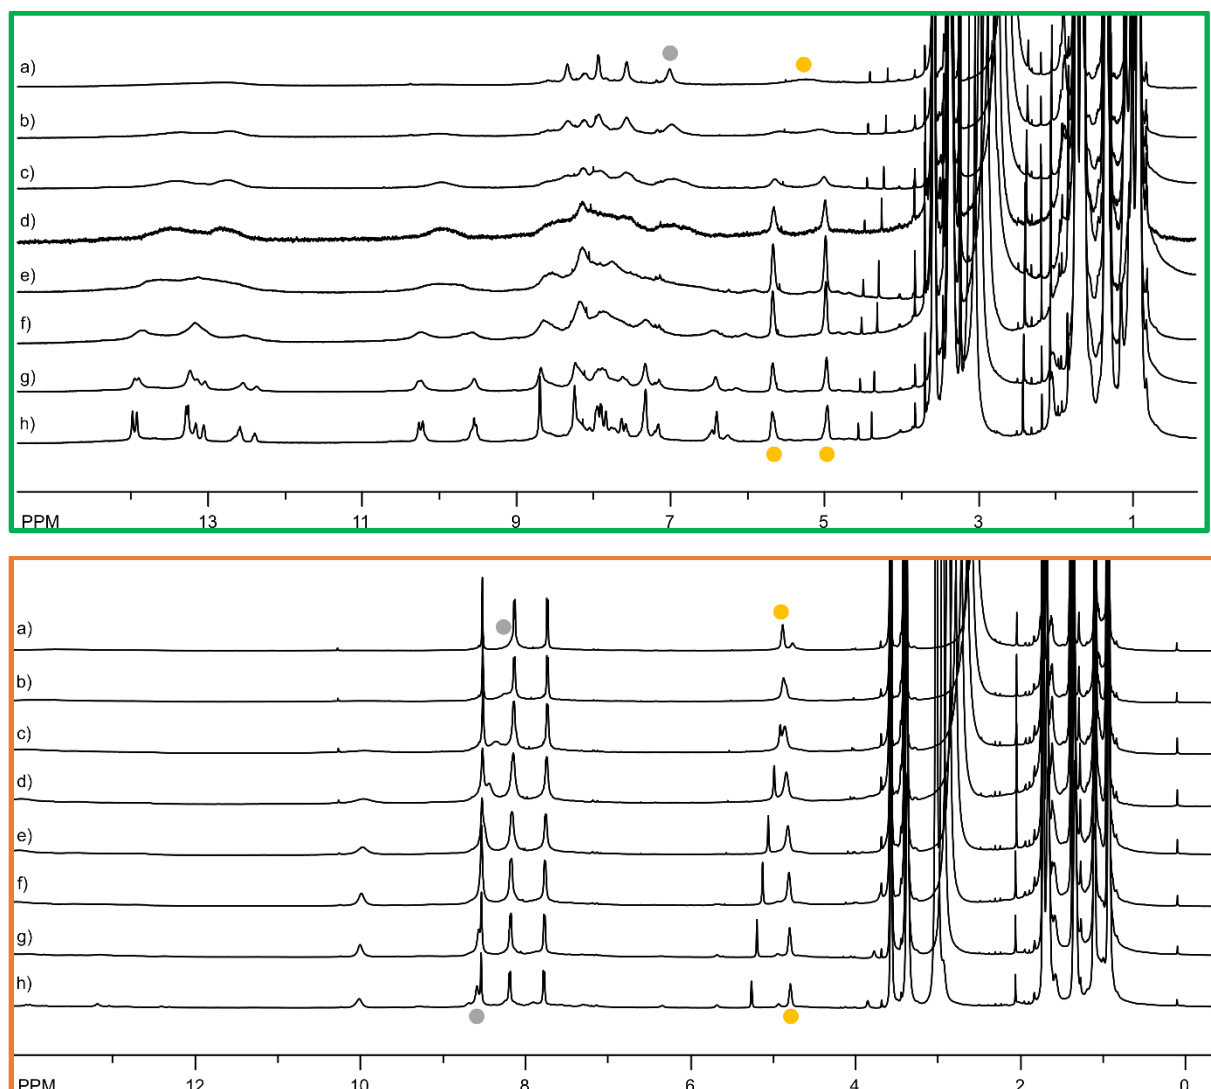

**Figure S34.** VT <sup>1</sup>H NMR spectra of **6** (C = 2 mM) with 4 eq. But<sub>4</sub>NCl (4 eq., green panel) or 4 eq. But<sub>4</sub>NBr (4 eq., orange panel) at: a) 313 K, b) 303 K, c) 293 K, d) 283 K, e) 273 K, f) 263 K, g) 253 K, h) 243 K, i) 233 K (all in [D<sub>8</sub>]THF, 600 MHz).

## 5. Theoretical calculations

All calculations for cavitands and monomers forms were performed within the density functional theory (DFT) approach using Gaussian 16 program suite.<sup>5</sup> Geometry was optimized with the B3LYP functional, employing the 6-31+G(D,P) basis set. Solvent effects (THF) were considered within the SMD model. Atomic coordinates for optimized structures are listed below.

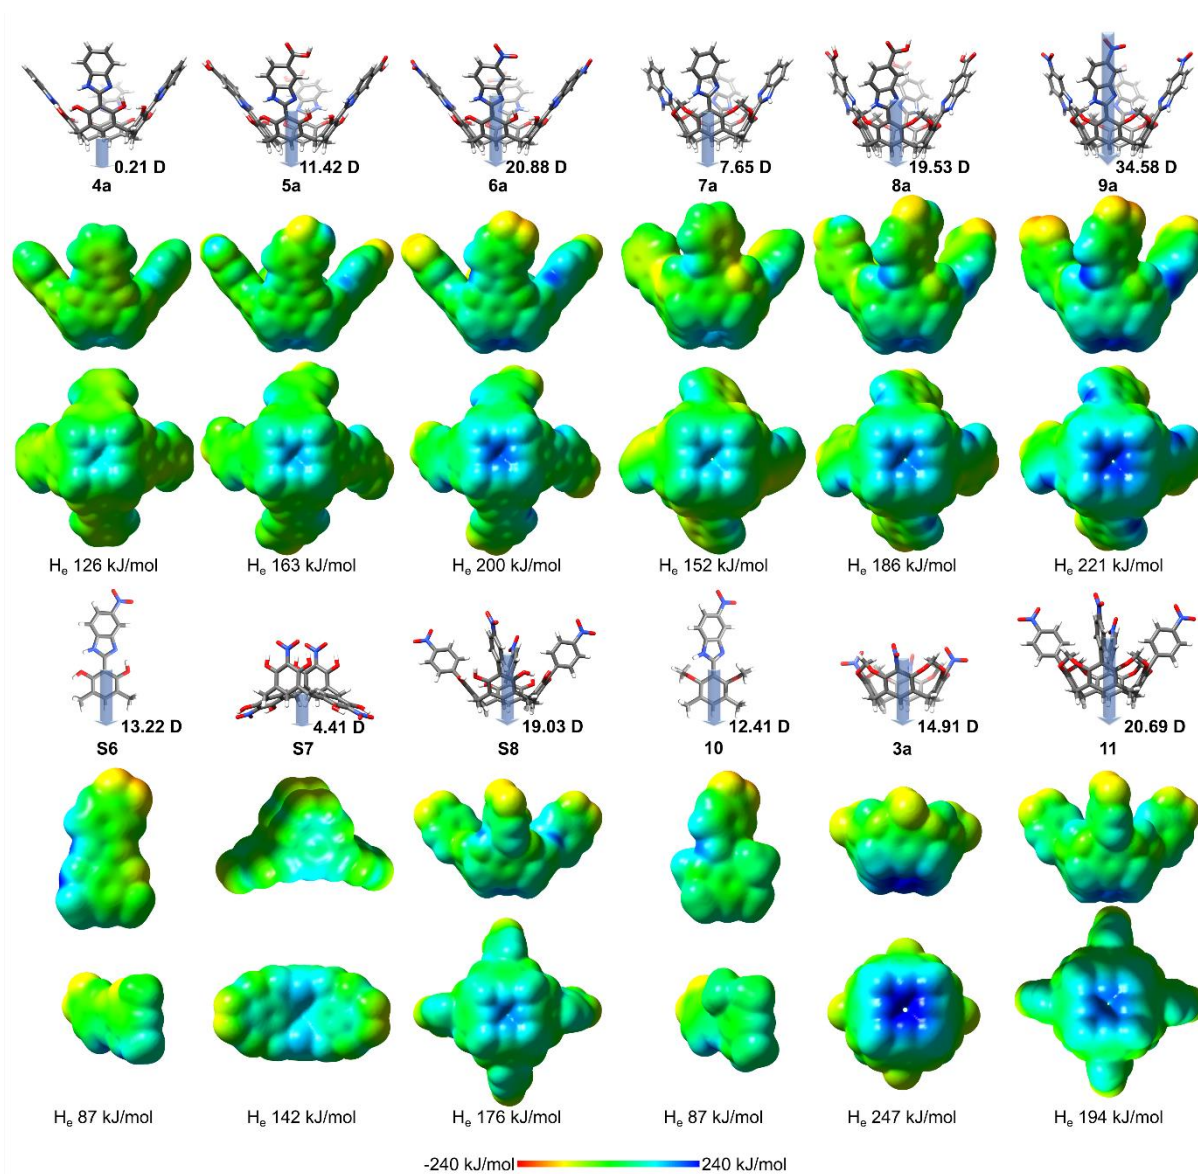

**Figure S35.** Theoretical calculation of geometry and electrostatic surface potentials (ESP). Geometry optimization by DFT B3LYP 6-31+G(D,P) in THF (SMD model); ESPs mapped onto electron density isosurfaces ( $0.0004 \text{ e au}^{-3}$ ).

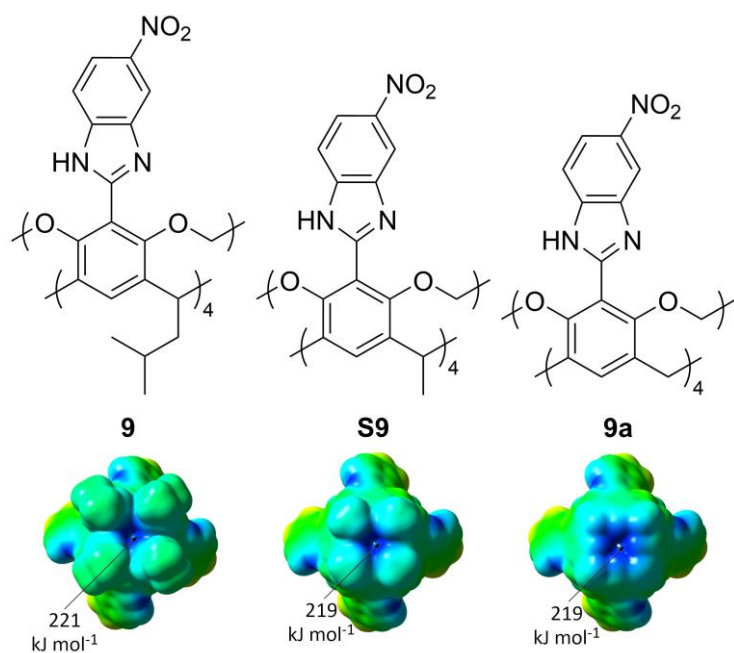

**Figure S36.** Theoretical calculation of geometry and electrostatic surface potentials (ESP). Geometry optimization by DFT B3LYP 6-31+G(D,P) in THF (SMD model); ESPs mapped onto electron density isosurfaces (0.0004 e au<sup>-3</sup>).

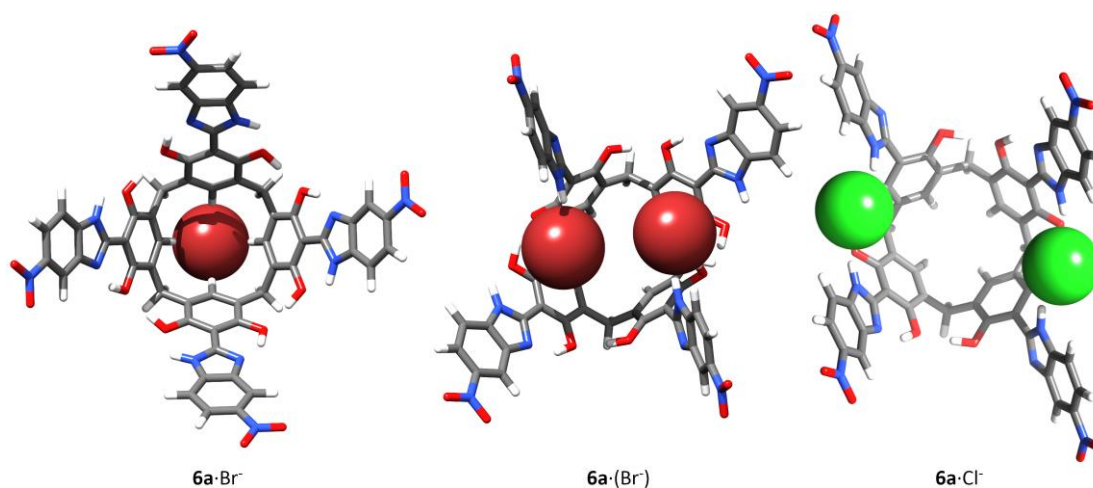

**Figure S37.** Theoretical calculation of geometry of complexes. Geometry optimization by DFT B3LYP 6-31+G(D,P) in THF (SMD model).



3a

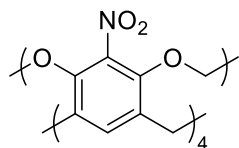

Energy = -2653.714 Hartree

Number of imaginary frequencies 0

| Symbol | X           | Y           | Z           |
|--------|-------------|-------------|-------------|
| O      | -2.38812300 | -4.07653200 | -0.28047700 |
| O      | 4.06466700  | 2.38639600  | -0.28144500 |
| O      | 4.07653200  | -2.38812300 | -0.28047700 |
| O      | 2.38639600  | -4.06466700 | -0.28144500 |
| O      | -2.38639600 | 4.06466700  | -0.28144500 |
| O      | 2.38812300  | 4.07653200  | -0.28047700 |
| O      | -4.07653200 | 2.38812300  | -0.28047700 |
| O      | -4.06466700 | -2.38639600 | -0.28144500 |
| C      | 3.09551400  | 3.10136900  | -1.04517000 |
| H      | 2.39666600  | 2.40743700  | -1.51997900 |
| H      | 3.66643900  | 3.66880300  | -1.77846400 |
| C      | 3.10136900  | -3.09551400 | -1.04517000 |
| H      | 3.66880300  | -3.66643900 | -1.77846400 |
| H      | 2.40743700  | -2.39666600 | -1.51997900 |
| C      | -3.10136900 | 3.09551400  | -1.04517000 |
| H      | -2.40743700 | 2.39666600  | -1.51997900 |
| H      | -3.66880300 | 3.66643900  | -1.77846400 |
| C      | -3.09551400 | -3.10136900 | -1.04517000 |
| H      | -2.39666600 | -2.40743700 | -1.51997900 |
| H      | -3.66643900 | -3.66880300 | -1.77846400 |
| O      | 0.32126000  | -4.19126000 | -2.51460900 |
| C      | 1.22986100  | -2.99090500 | 1.56676700  |
| N      | 4.79679900  | 0.01143200  | -1.48772800 |

|   |             |             |             |
|---|-------------|-------------|-------------|
| C | -2.68008600 | 0.00147600  | 2.15398800  |
| H | -2.15322100 | 0.00289800  | 3.10455000  |
| C | 1.23194400  | 2.99959600  | 1.56857300  |
| C | 2.53769600  | -2.53769600 | 2.18857600  |
| H | 3.30250700  | -3.30774400 | 2.05105500  |
| H | 2.39213800  | -2.39185200 | 3.26167000  |
| C | 1.22613100  | 3.69098900  | 0.34917900  |
| O | 5.98789700  | -0.28017500 | -1.43306800 |
| C | 2.99090500  | 1.22986100  | 1.56676700  |
| C | -1.22613100 | -3.69098900 | 0.34917900  |
| C | -0.00147600 | -2.68008600 | 2.15398800  |
| H | -0.00289800 | -2.15322100 | 3.10455000  |
| N | 0.01143200  | -4.79679900 | -1.48772800 |
| C | 3.67050600  | 1.22376200  | 0.34154000  |
| N | -0.01143200 | 4.79679900  | -1.48772800 |
| C | 3.69098900  | -1.22613100 | 0.34917900  |
| O | -5.98789700 | 0.28017500  | -1.43306800 |
| C | -3.69098900 | 1.22613100  | 0.34917900  |
| O | 4.19126000  | 0.32126000  | -2.51460900 |
| C | 0.00147600  | 2.68008600  | 2.15398800  |
| H | 0.00289800  | 2.15322100  | 3.10455000  |
| C | 1.22376200  | -3.67050600 | 0.34154000  |
| N | -4.79679900 | -0.01143200 | -1.48772800 |
| C | -2.99090500 | -1.22986100 | 1.56676700  |
| C | -1.22986100 | 2.99090500  | 1.56676700  |
| C | 2.68008600  | -0.00147600 | 2.15398800  |
| H | 2.15322100  | -0.00289800 | 3.10455000  |
| O | -0.32126000 | 4.19126000  | -2.51460900 |
| C | -0.00027500 | 4.03459300  | -0.22811100 |
| C | -2.53769600 | -2.53769600 | 2.18857600  |

H -3.30774400 -3.30250700 2.05105500  
H -2.39185200 -2.39213800 3.26167000  
C -2.99959600 1.23194400 1.56857300  
C -3.67050600 -1.22376200 0.34154000  
C -4.03459300 -0.00027500 -0.22811100  
C 2.99959600 -1.23194400 1.56857300  
C 2.53769600 2.53769600 2.18857600  
H 3.30774400 3.30250700 2.05105500  
H 2.39185200 2.39213800 3.26167000  
O -0.28017500 -5.98789700 -1.43306800  
C 0.00027500 -4.03459300 -0.22811100  
C -1.23194400 -2.99959600 1.56857300  
C -2.53769600 2.53769600 2.18857600  
H -3.30250700 3.30774400 2.05105500  
H -2.39213800 2.39185200 3.26167000  
O 0.28017500 5.98789700 -1.43306800  
C -1.22376200 3.67050600 0.34154000  
C 4.03459300 0.00027500 -0.22811100  
O -4.19126000 -0.32126000 -2.51460900

4a

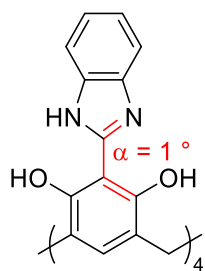

Energy = -3198.3285 Hartree

Number of imaginary frequencies 0

| Symbol | X           | Y           | Z           |
|--------|-------------|-------------|-------------|
| O      | 4.67795000  | 1.63982300  | -1.10650500 |
| O      | -3.07415900 | -3.81151000 | -0.93506300 |
| O      | 1.64098600  | -4.67305600 | -1.10148100 |
| O      | 3.82255800  | -3.07673300 | -0.94175100 |
| O      | -3.82238700 | 3.07473700  | -0.93807500 |
| O      | -4.67983900 | -1.64126700 | -1.10860200 |
| O      | -1.63990600 | 4.67071200  | -1.09660500 |
| O      | 3.07673900  | 3.81428300  | -0.93683800 |
| C      | 2.77295300  | -1.74511300 | -2.66937800 |
| C      | 0.46563700  | 2.60392700  | -3.21196700 |
| H      | 0.35982100  | 1.96783500  | -4.08782200 |
| C      | -3.21355900 | -0.67961400 | -2.70099700 |
| C      | 2.05209600  | -2.93378600 | -3.29592600 |
| H      | 2.67622600  | -3.83129100 | -3.23614900 |
| H      | 1.92347600  | -2.71849800 | -4.36088800 |
| C      | -4.06728900 | -0.52587400 | -1.60077400 |
| C      | -1.74324200 | -2.76939600 | -2.66759500 |
| C      | 4.06610900  | 0.52473500  | -1.60038900 |
| C      | 2.60449300  | -0.46686100 | -3.21426300 |
| H      | 1.96530300  | -0.36157800 | -4.08793600 |
| C      | -1.86894500 | -3.59730100 | -1.54086900 |
| C      | 0.52616500  | -4.06128800 | -1.59592700 |
| C      | -0.52504700 | 4.06045500  | -1.59276000 |
| C      | -2.60419400 | 0.46678400  | -3.21267900 |
| H      | -1.96449400 | 0.36204200  | -4.08604700 |
| C      | 3.60501500  | -1.87090300 | -1.54570500 |
| C      | 1.74407200  | 2.76996700  | -2.66683100 |
| C      | -2.77251600 | 1.74454800  | -2.66667400 |
| C      | -0.46529800 | -2.60404800 | -3.21399700 |
| H      | -0.36017300 | -1.96828800 | -4.09016500 |
| C      | -4.28379600 | 0.74627100  | -1.00607600 |
| C      | 2.93246700  | 2.05094800  | -3.29579000 |
| H      | 3.82934600  | 2.67604000  | -3.23682900 |
| H      | 2.71579300  | 1.92307300  | -4.36055400 |
| C      | -0.68004500 | 3.21157300  | -2.69666000 |
| C      | 1.87057700  | 3.59860400  | -1.54075300 |
| C      | 0.74805400  | 4.27520300  | -0.99939000 |
| C      | 0.68065000  | -3.21206500 | -2.69966800 |
| C      | -2.93215700 | -2.05084700 | -3.29613900 |
| H      | -3.82872500 | -2.67640600 | -3.23722300 |
| H      | -2.71580800 | -1.92251800 | -4.36090700 |
| C      | 4.28285200  | -0.74790400 | -1.00695400 |
| C      | 3.21328600  | 0.67926100  | -2.70124900 |
| C      | -2.05176800 | 2.93367000  | -3.29238100 |
| H      | -2.67592300 | 3.83113600  | -3.23171600 |
| H      | -1.92349600 | 2.71920600  | -4.35754300 |
| C      | -3.60503100 | 1.86948500  | -1.54321900 |
| C      | -0.74633800 | -4.27470700 | -1.00072600 |
| C      | -0.83526000 | -5.15956600 | 0.15747400  |
| C      | -0.22438700 | -6.52304300 | 1.74555500  |
| C      | -1.62111200 | -6.33188800 | 1.87889500  |
| C      | 0.46297700  | -7.36000000 | 2.63601100  |
| C      | -2.36755400 | -6.95448400 | 2.88319100  |

|   |             |             |            |   |             |             |             |
|---|-------------|-------------|------------|---|-------------|-------------|-------------|
| C | -0.27675600 | -7.98285300 | 3.63971900 | N | -1.96901300 | -5.46716700 | 0.85814000  |
| H | 1.53386000  | -7.51330600 | 2.54210500 | N | 0.23095200  | -5.78322400 | 0.66874800  |
| C | -1.66964100 | -7.78344100 | 3.76161100 | N | -5.79946800 | -0.23281700 | 0.65598600  |
| H | -3.43817100 | -6.80052300 | 2.97623900 | N | -5.48424100 | 1.96700600  | 0.84870400  |
| C | -5.17335000 | 0.83383000  | 0.14863600 | N | -0.22875900 | 5.78255000  | 0.67148700  |
| C | -6.54394600 | 0.22164100  | 1.72998600 | N | 1.97285000  | 5.47370500  | 0.85394400  |
| C | -6.35337700 | 1.61826100  | 1.86539800 | N | 5.79472400  | 0.23039300  | 0.65903400  |
| C | -7.38465800 | -0.46649900 | 2.61629100 | N | 5.48238400  | -1.97029500 | 0.84712300  |
| C | -6.98042100 | 2.36388200  | 2.86754300 | H | -2.88281600 | -5.09053100 | 0.63962300  |
| C | -8.01176200 | 0.27234900  | 3.61800800 | H | -5.10661800 | 2.88088800  | 0.63242100  |
| H | -7.53744000 | -1.53732500 | 2.52088800 | H | 2.88710100  | 5.10010000  | 0.63229300  |
| C | -7.81309600 | 1.66517900  | 3.74181000 | H | 5.10624900  | -2.88422400 | 0.62848400  |
| H | -6.82700700 | 3.43444900  | 2.96208600 | H | 1.35942800  | -5.24262200 | -0.30072200 |
| C | 0.83762800  | 5.16109200  | 0.15795100 | H | 3.06157700  | -3.69361000 | -1.06651900 |
| C | 0.22792800  | 6.52516100  | 1.74582900 | H | -3.69250500 | -3.05288300 | -1.06606200 |
| C | 1.62571500  | 6.33866000  | 1.87469300 | H | -5.25025500 | -1.35985400 | -0.30853800 |
| C | -0.45907300 | 7.36093400  | 2.63765600 | H | -3.06170400 | 3.69194200  | -1.06275300 |
| C | 2.37366300  | 6.96504000  | 2.87552500 | H | -1.35827700 | 5.23879600  | -0.29493300 |
| C | 0.28211100  | 7.98750600  | 3.63798500 | H | 3.69445000  | 3.05468700  | -1.06549300 |
| H | -1.53080500 | 7.51044300  | 2.54738600 | H | 5.24952800  | 1.35779600  | -0.30757200 |
| C | 1.67608800  | 7.79289500  | 3.75524400 | H | 0.22672700  | -8.63681400 | 4.34589400  |
| H | 3.44513000  | 6.81486100  | 2.96490700 | H | -2.20992300 | -8.28707100 | 4.55786100  |
| C | 5.17089100  | -0.83621100 | 0.14881300 | H | -8.66859800 | -0.23177500 | 4.32104800  |
| C | 6.53816100  | -0.22508100 | 1.73332700 | H | -8.32018300 | 2.20475900  | 4.53634000  |
| C | 6.34951100  | -1.62226400 | 1.86572900 | H | -0.22106500 | 8.64070300  | 4.34508400  |
| C | 7.37647300  | 0.46256700  | 2.62227900 | H | 2.21750800  | 8.29943800  | 4.54887200  |
| C | 6.97615200  | -2.36891600 | 2.86736500 | H | 8.31330700  | -2.21108300 | 4.53837700  |
| C | 8.00325800  | -0.27732500 | 3.62342600 | H | 8.65831800  | 0.22640500  | 4.32840400  |
| H | 7.52772900  | 1.53382200  | 2.52926000 |   |             |             |             |
| C | 7.80652700  | -1.67070100 | 3.74419800 |   |             |             |             |
| H | 6.82421900  | -3.43990400 | 2.95952900 |   |             |             |             |

5a

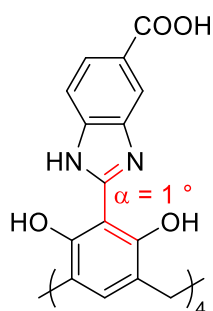

Energy = -3952.6997 Hartree

Number of imaginary frequencies 0

| Symbol | X           | Y           | Z           |
|--------|-------------|-------------|-------------|
| O      | -1.15001900 | 4.81667800  | -1.83697100 |
| O      | 3.48421300  | -3.45421600 | -1.66877800 |
| O      | 4.82080000  | 1.14960200  | -1.83795900 |
| O      | 3.45373300  | 3.47892300  | -1.67104100 |
| O      | -3.45635000 | -3.48180000 | -1.67172300 |
| O      | 1.14683300  | -4.82104500 | -1.83306900 |
| O      | -4.81920500 | -1.14754000 | -1.83674400 |
| O      | -3.48067800 | 3.45610600  | -1.67466200 |
| C      | 2.02180300  | 2.57475500  | -3.40041500 |
| C      | -2.54088300 | 0.73261800  | -3.94514100 |
| H      | -1.91691000 | 0.56163800  | -4.81908200 |
| C      | 0.34414000  | -3.26593200 | -3.42749100 |
| C      | 3.12922700  | 1.73540700  | -4.02785900 |
| H      | 4.08623200  | 2.26410100  | -3.97030800 |
| H      | 2.90079000  | 1.62831800  | -5.09246500 |
| C      | 0.10105400  | -4.09726800 | -2.32657100 |
| C      | 2.57630700  | -2.02273000 | -3.39679500 |
| C      | -0.10279500 | 4.09499900  | -2.33048600 |
| C      | 0.73299100  | 2.54077500  | -3.94541300 |
| H      | 0.56301400  | 1.91749600  | -4.82005100 |
| C      | 3.39146800  | -2.23371500 | -2.27384700 |
| C      | 4.09776300  | 0.10244500  | -2.32959100 |

|   |             |             |             |
|---|-------------|-------------|-------------|
| C | -4.09636900 | -0.10121700 | -2.33045900 |
| C | -0.73221700 | -2.54159700 | -3.94132200 |
| H | -0.56106900 | -1.91797100 | -4.81548100 |
| C | 2.23321300  | 3.38805900  | -2.27624900 |
| C | -2.57569600 | 2.02217900  | -3.40194200 |
| C | -2.02186100 | -2.57594500 | -3.39821000 |
| C | 2.54123900  | -0.73397400 | -3.94194200 |
| H | 1.91682500  | -0.56433600 | -4.81583100 |
| C | -1.18823300 | -4.18052700 | -1.73477300 |
| C | -1.73622000 | 3.12917100  | -4.02987700 |
| H | -2.26446200 | 4.08637100  | -3.97194700 |
| H | -1.62964700 | 2.90088100  | -5.09457900 |
| C | -3.26491000 | -0.34394100 | -3.43137400 |
| C | -3.38966900 | 2.23485500  | -2.27853000 |
| C | -4.18012000 | 1.18805900  | -1.73861900 |
| C | 3.26563500  | 0.34338700  | -3.43033100 |
| C | 1.73704900  | -3.13077700 | -4.02345500 |
| H | 2.26535700  | -4.08786300 | -3.96410800 |
| H | 1.63121600  | -2.90380600 | -5.08850300 |
| C | 1.18576600  | 4.17812500  | -1.73696800 |
| C | -0.34403000 | 3.26478700  | -3.43265100 |
| C | -3.12873500 | -1.73683000 | -4.02702700 |
| H | -4.08593000 | -2.26514200 | -3.96925200 |
| H | -2.89990800 | -1.63109100 | -5.09169000 |
| C | -2.23485200 | -3.38994400 | -2.27483000 |
| C | 4.18213600  | -1.18597700 | -1.73602900 |
| C | 5.05823200  | -1.36703800 | -0.58365500 |
| C | 6.48444500  | -0.91304800 | 0.99738700  |
| C | 6.15159300  | -2.28502900 | 1.12230600  |
| C | 7.38835500  | -0.31984000 | 1.88031300  |
| C | 6.70172200  | -3.09859700 | 2.11856500  |

|   |             |             |             |   |             |             |             |
|---|-------------|-------------|-------------|---|-------------|-------------|-------------|
| C | 7.94415600  | -1.12815400 | 2.88125900  | N | 5.25347100  | -2.53428400 | 0.11003300  |
| H | 7.64805900  | 0.72834500  | 1.79027500  | N | 5.78924400  | -0.37504600 | -0.07084800 |
| C | 7.59988500  | -2.49924700 | 2.99212500  | N | -0.38006400 | -5.78668400 | -0.06748400 |
| H | 6.44115300  | -4.14814000 | 2.20764600  | N | -2.53934700 | -5.24994200 | 0.11040700  |
| C | -1.37118600 | -5.05572400 | -0.58204200 | N | -5.78540400 | 0.37942900  | -0.07059300 |
| C | -0.91953800 | -6.48067500 | 1.00078200  | N | -5.24996800 | 2.53910800  | 0.10628700  |
| C | -2.29153900 | -6.14717100 | 1.12383900  | N | 0.37581800  | 5.78293100  | -0.06904400 |
| C | -0.32767800 | -7.38396500 | 1.88525600  | N | 2.53475300  | 5.24545200  | 0.11085000  |
| C | -3.10641200 | -6.69595500 | 2.11977700  | H | 4.78574100  | -3.40473000 | -0.11277000 |
| C | -1.13727800 | -7.93830400 | 2.88596700  | H | -3.40940100 | -4.78213800 | -0.11379700 |
| H | 0.72052300  | -7.64413600 | 1.79669900  | H | -4.78284400 | 3.40936300  | -0.11852500 |
| C | -2.50835600 | -7.59338800 | 2.99497200  | H | 3.40493300  | 4.77763400  | -0.11282900 |
| H | -4.15593700 | -6.43484600 | 2.20745400  | H | 5.36065800  | 0.81683400  | -1.04087900 |
| C | -5.05519600 | 1.37079700  | -0.58574200 | H | 3.99138000  | 2.66112700  | -1.79994400 |
| C | -6.47950000 | 0.91893100  | 0.99759900  | H | 2.66636500  | -3.99226400 | -1.79557200 |
| C | -6.14684900 | 2.29119500  | 1.11999200  | H | 0.81237600  | -5.36046200 | -1.03646700 |
| C | -7.38226700 | 0.32688100  | 1.88247700  | H | -3.99440400 | -2.66437300 | -1.80115300 |
| C | -6.69608500 | 3.10618500  | 2.11558200  | H | -5.35870700 | -0.81350600 | -1.04003500 |
| C | -7.93703300 | 1.13659100  | 2.88286700  | H | -2.66260300 | 3.99324200  | -1.80356000 |
| H | -7.64178000 | -0.72152000 | 1.79440000  | H | -0.81718900 | 5.35491400  | -1.03892500 |
| C | -7.59299700 | 2.50794200  | 2.99118200  | H | 8.05598200  | -3.08384600 | 3.78324300  |
| H | -6.43571600 | 4.15593900  | 2.20270700  | H | -3.09395700 | -8.04835100 | 3.78600300  |
| C | 1.36733300  | 5.05215300  | -0.58311000 | H | -8.04827700 | 3.09364400  | 3.78195700  |
| C | 0.91426400  | 6.47575900  | 1.00049900  | H | 3.08588600  | 8.04017000  | 3.78974400  |
| C | 2.28602900  | 6.14177100  | 1.12484300  | C | -0.59110800 | -8.90549500 | 3.86751500  |
| C | 0.32162700  | 7.37837900  | 1.88513300  | O | -1.23197100 | -9.43405900 | 4.76352100  |
| C | 3.09990500  | 6.68939300  | 2.12223100  | O | 0.72624900  | -9.17120800 | 3.69007100  |
| C | 1.13022100  | 7.93154200  | 2.88731700  | H | 0.98717600  | -9.81090700 | 4.37699800  |
| H | -0.72640200 | 7.63891200  | 1.79560100  | C | 8.91239100  | -0.58061400 | 3.86102200  |
| C | 2.50107100  | 7.58613200  | 2.99760000  | O | 9.44236500  | -1.22039200 | 4.75696900  |
| H | 4.14926700  | 6.42794500  | 2.21086200  | O | 9.17636800  | 0.73698100  | 3.68273600  |

|   |             |             |            |
|---|-------------|-------------|------------|
| H | 9.81664900  | 0.99891200  | 4.36873900 |
| C | 0.58318300  | 8.89790200  | 3.86919800 |
| O | 1.22291400  | 9.42459400  | 4.76711000 |
| O | -0.73374200 | 9.16465600  | 3.69011300 |
| H | -0.99537700 | 9.80341100  | 4.37765000 |
| C | -8.90378400 | 0.59028600  | 3.86477300 |
| O | -9.43255000 | 1.23123800  | 4.76059300 |
| O | -9.16841900 | -0.72741300 | 3.68824300 |
| H | -9.80778900 | -0.98842300 | 4.37544600 |

6a

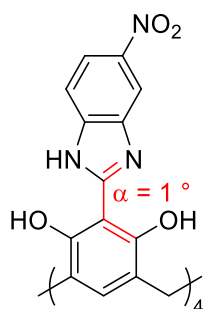

Energy = -4016.3882 Hartree

Number of imaginary frequencies 0

| Symbol | X           | Y           | Z           |
|--------|-------------|-------------|-------------|
| O      | 2.28483400  | -4.39894400 | -1.81930300 |
| O      | -4.21962000 | 2.50805700  | -1.65370700 |
| O      | -4.40238300 | -2.28318800 | -1.82075700 |
| O      | -2.50675600 | -4.21798800 | -1.64877400 |
| O      | 2.50774300  | 4.21477600  | -1.65053600 |
| O      | -2.28386800 | 4.39593000  | -1.81821900 |
| O      | 4.40169900  | 2.28437000  | -1.82280800 |
| O      | 4.22058900  | -2.50678700 | -1.65265800 |
| C      | -1.33767600 | -2.98960900 | -3.37562800 |
| C      | 2.64300800  | -0.09544600 | -3.92145400 |
| H      | 1.99561700  | -0.08323900 | -4.79491300 |
| C      | -1.12516700 | 3.08320000  | -3.40908300 |
| C      | -2.61517200 | -2.44388300 | -4.00390300 |
| H      | -3.41620100 | -3.18804000 | -3.94694000 |
| H      | -2.41896000 | -2.28486700 | -5.06825200 |
| C      | -1.09237600 | 3.94919300  | -2.30892400 |
| C      | -2.98989900 | 1.33747100  | -3.37839200 |
| C      | 1.09302500  | -3.95063000 | -2.30816500 |
| C      | -0.09541000 | -2.64322200 | -3.91983500 |
| H      | -0.08335800 | -1.99756200 | -4.79456700 |
| C      | -3.83378100 | 1.34635900  | -2.25752600 |
| C      | -3.95323900 | -1.09207600 | -2.31022300 |

|   |             |             |             |
|---|-------------|-------------|-------------|
| C | 3.95319000  | 1.09268700  | -2.31167600 |
| C | 0.09530300  | 2.64240400  | -3.92179900 |
| H | 0.08281200  | 1.99694500  | -4.79669200 |
| C | -1.34550500 | -3.83175700 | -2.25335600 |
| C | 2.99023700  | -1.33781900 | -3.37814400 |
| C | 1.33768400  | 2.98838700  | -3.37786900 |
| C | -2.64267800 | 0.09464000  | -3.92075900 |
| H | -1.99526700 | 0.08171700  | -4.79420200 |
| C | 0.13803700  | 4.34396100  | -1.71649800 |
| C | 2.44311700  | -2.61528100 | -4.00544300 |
| H | 3.18696100  | -3.41662800 | -3.94937700 |
| H | 2.28290100  | -2.41924700 | -5.06965600 |
| C | 3.08471100  | 1.12520700  | -3.40977500 |
| C | 3.83438000  | -1.34579700 | -2.25736500 |
| C | 4.34935100  | -0.13766600 | -1.72006400 |
| C | -3.08452300 | -1.12558100 | -3.40821100 |
| C | -2.44293900 | 2.61453100  | -4.00645400 |
| H | -3.18670000 | 3.41595900  | -3.95009700 |
| H | -2.28321200 | 2.41841000  | -5.07072100 |
| C | -0.13714200 | -4.34555300 | -1.71531200 |
| C | 1.12539900  | -3.08396800 | -3.40778500 |
| C | 2.61504300  | 2.44290600  | -4.00630700 |
| H | 3.41585600  | 3.18728600  | -3.94957200 |
| H | 2.41890200  | 2.28352200  | -5.07062000 |
| C | 1.34606400  | 3.82999500  | -2.25518800 |
| C | -4.34900100 | 0.13882500  | -1.71934600 |
| C | -5.24693600 | 0.10546300  | -0.57149900 |
| C | -6.53134200 | -0.67341500 | 1.00093800  |
| C | -6.53787100 | 0.74093100  | 1.12449100  |
| C | -7.27089600 | -1.46535800 | 1.87715600  |
| C | -7.27287700 | 1.40317300  | 2.11391300  |



|   |             |             |             |   |             |             |             |
|---|-------------|-------------|-------------|---|-------------|-------------|-------------|
| C | -7.99877200 | -0.78958400 | 2.85776900  | N | -5.72062600 | 1.19473500  | 0.11868700  |
| H | -7.28440100 | -2.54546000 | 1.80491600  | N | -5.72145400 | -1.03157900 | -0.05920400 |
| C | -8.01047800 | 0.61553000  | 2.98749000  | N | -1.03359300 | 5.71083300  | -0.05214200 |
| H | -7.27100700 | 2.48421800  | 2.20094400  | N | 1.19274600  | 5.71246200  | 0.12417600  |
| C | 0.10370100  | 5.23918500  | -0.56651500 | N | 5.72128500  | 1.03423200  | -0.06033400 |
| C | -0.67566300 | 6.51825100  | 1.00998700  | N | 5.72091700  | -1.19198600 | 0.11846200  |
| C | 0.73875900  | 6.52630800  | 1.13253000  | N | 1.03481700  | -5.71282100 | -0.05136600 |
| C | -1.46780000 | 7.25423000  | 1.88902100  | N | -1.19139300 | -5.71469600 | 0.12489800  |
| C | 1.40096100  | 7.25943700  | 2.12341800  | H | -5.47570800 | 2.15211800  | -0.10671100 |
| C | -0.79218700 | 7.97979200  | 2.87146400  | H | 2.15015000  | 5.46933900  | -0.10284700 |
| H | -2.54796300 | 7.26642400  | 1.81793700  | H | 5.47613500  | -2.14939500 | -0.10685700 |
| C | 0.61303200  | 7.99337500  | 2.99987500  | H | -2.14870600 | -5.47115500 | -0.10197700 |
| H | 2.48207900  | 7.25866800  | 2.20956000  | H | -5.01126300 | -2.09442100 | -1.02988600 |
| C | 5.24725600  | -0.10315400 | -0.57229800 | H | -3.22896700 | -3.55881900 | -1.78170100 |
| C | 6.53032200  | 0.67666500  | 1.00073800  | H | -3.55996600 | 3.22964500  | -1.78679600 |
| C | 6.53725600  | -0.73765800 | 1.12472000  | H | -2.09560400 | 5.00212400  | -1.02541700 |
| C | 7.26889000  | 1.46907100  | 1.87740100  | H | 3.22930200  | 3.55529300  | -1.78452700 |
| C | 7.27158700  | -1.39940300 | 2.11496500  | H | 5.01058200  | 2.09639200  | -1.03197700 |
| C | 7.99605000  | 0.79376100  | 2.85890500  | H | 3.56099000  | -3.22873500 | -1.78472600 |
| H | 7.28217200  | 2.54915300  | 1.80487300  | H | 2.09718300  | -5.00770600 | -1.02821400 |
| C | 8.00823100  | -0.61130900 | 2.98894100  | H | -8.59905800 | 1.07154900  | 3.77316200  |
| H | 7.26983000  | -2.48041800 | 2.20236000  | H | 1.06881900  | 8.58016300  | 3.78701200  |
| C | -0.10250800 | -5.24116100 | -0.56568000 | H | 8.59616000  | -1.06688600 | 3.77535500  |
| C | 0.67706500  | -6.52073400 | 1.01048500  | H | -1.06718600 | -8.58444400 | 3.78619300  |
| C | -0.73734300 | -6.52910200 | 1.13284300  | N | -1.58220700 | 8.76505300  | 3.81602100  |
| C | 1.46932400  | -7.25685500 | 1.88930700  | O | -0.98689700 | 9.41669500  | 4.68341700  |
| C | -1.39941100 | -7.26290400 | 2.12329100  | O | -2.81520500 | 8.74929000  | 3.70895600  |
| C | 0.79380900  | -7.98317000 | 2.87127200  | N | 8.78494000  | 1.58369600  | 3.80046800  |
| H | 2.54947500  | -7.26894200 | 1.81813500  | O | 9.43601900  | 0.98842000  | 4.66831500  |
| C | -0.61142000 | -7.99710900 | 2.99947000  | O | 8.76820300  | 2.81673100  | 3.69411900  |
| H | -2.48054500 | -7.26254200 | 2.20923400  | N | 1.58390400  | -8.76866100 | 3.81559100  |

O 0.98872400 -9.41952300 4.68365500  
O 2.81705600 -8.74978100 3.71091100  
N -8.78896800 -1.57908000 3.79863000  
O -9.44175300 -0.98345500 4.66493400  
O -8.77252000 -2.81212200 3.69256300

7a

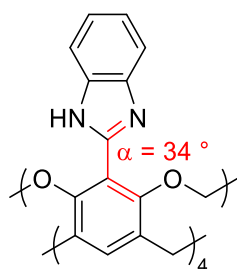

Energy = -3350.557 Hartree

Number of imaginary frequencies 0

Symbol X Y Z

O -4.73838800 -0.17311400 -1.16287700  
 O 4.07033400 2.44486900 -1.13504000  
 O -0.17297000 4.73828500 -1.16344700  
 O -2.44493700 4.07022700 -1.13520600  
 O 2.44501200 -4.07035600 -1.13416600  
 O 4.73845600 0.17292400 -1.16294800  
 O 0.17306400 -4.73846400 -1.16224800  
 O -4.07024500 -2.44504300 -1.13437500  
 C 4.26260700 1.24597500 -0.37347100  
 H 3.33788400 0.97323100 0.14004400  
 H 5.05907800 1.47724100 0.33252500  
 C -1.24594100 4.26253200 -0.37380500  
 H -1.47709500 5.05907300 0.33214900  
 H -0.97316400 3.33784700 0.13976100  
 C 1.24602600 -4.26250400 -0.37271400  
 H 0.97322600 -3.33770300 0.14063200  
 H 1.47720200 -5.05887100 0.33342800  
 C -4.26252800 -1.24595500 -0.37311900  
 H -3.33781000 -0.97306700 0.14033000  
 H -5.05899900 -1.47704700 0.33293400  
 C -2.04541400 2.51024800 -2.92327600  
 C -1.27682500 -2.33818500 -3.51077200

H -1.02108000 -1.86350900 -4.45465900  
 C 3.20781100 -0.35707400 -2.92266100  
 C -1.01135200 3.43448700 -3.54213800  
 H -1.31245200 4.47675500 -3.40525400  
 H -0.95438800 3.23435500 -4.61552800  
 C 3.81218000 -0.69584100 -1.70432500  
 C 2.51056000 2.04509100 -2.92326900  
 C -3.81212400 0.69552800 -1.70446700  
 C -2.33777700 1.27650300 -3.51121800  
 H -1.86295000 1.02064000 -4.45499700  
 C 2.82811200 2.66810100 -1.70933100  
 C 0.69572000 3.81194300 -1.70482900  
 C -0.69563500 -3.81226900 -1.70386800  
 C 2.33783100 -1.27726400 -3.51093900  
 H 1.86301400 -1.02163900 -4.45478800  
 C -2.66832100 2.82794700 -1.70932000  
 C -2.51049300 -2.04571700 -2.92271700  
 C 2.04545500 -2.51085900 -2.92268500  
 C 1.27687600 2.33740200 -3.51137200  
 H 1.02111400 1.86248900 -4.45513600  
 C 3.56485900 -1.93673200 -1.07372900  
 C -3.43481200 -1.01174900 -3.54161600  
 H -4.47705900 -1.31285400 -3.40459000  
 H -3.23478700 -0.95491000 -4.61503200  
 C -0.35671600 -3.20808600 -2.92225300  
 C -2.82802800 -2.66842600 -1.70861900  
 C -1.93660700 -3.56486300 -1.07346800  
 C 0.35677600 3.20745000 -2.92305200  
 C 3.43488000 1.01097300 -3.54191400  
 H 4.47712800 1.31211100 -3.40496600  
 H 3.23485200 0.95386400 -4.61531600

|   |             |             |             |   |             |             |             |
|---|-------------|-------------|-------------|---|-------------|-------------|-------------|
| C | -3.56486900 | 1.93659400  | -1.07419200 | H | -0.77522100 | -5.54796300 | 3.75190000  |
| C | -3.20774600 | 0.35645500  | -2.92270900 | C | -4.15140800 | -6.19665300 | 3.82614000  |
| C | 1.01140100  | -3.43526400 | -3.54130800 | H | -5.58840300 | -5.75225800 | 2.26252400  |
| H | 1.31251400  | -4.47749400 | -3.40416700 | C | -4.21414100 | 2.28307100  | 0.20618600  |
| H | 0.95442000  | -3.23539700 | -4.61474700 | C | -5.09609400 | 2.19439300  | 2.17334700  |
| C | 2.66832800  | -2.82822900 | -1.70862900 | C | -5.16105300 | 3.55222400  | 1.77089000  |
| C | 1.93670400  | 3.56468800  | -1.07438600 | C | -5.59343700 | 1.81197700  | 3.42962500  |
| C | 2.28318400  | 4.21401100  | 0.20595000  | C | -5.70986100 | 4.55182900  | 2.58150500  |
| C | 2.19461500  | 5.09600200  | 2.17308400  | C | -6.14068800 | 2.80195100  | 4.24261100  |
| C | 3.55249300  | 5.16058600  | 1.77071900  | H | -5.54872800 | 0.77536500  | 3.75090100  |
| C | 1.81224200  | 5.59351400  | 3.42930900  | C | -6.19810300 | 4.15143200  | 3.82465300  |
| C | 4.55218500  | 5.70917400  | 2.58137800  | H | -5.75370200 | 5.58834500  | 2.26096200  |
| C | 2.80229900  | 6.14056400  | 4.24232800  | N | 3.57138600  | 4.59260000  | 0.51581700  |
| H | 0.77560000  | 5.54907500  | 3.75052100  | N | 1.43283600  | 4.50492800  | 1.17968600  |
| C | 4.15182400  | 6.19760000  | 3.82446400  | N | 4.50483000  | -1.43250000 | 1.18037000  |
| H | 5.58873600  | 5.75272000  | 2.26091000  | N | 4.59265600  | -3.57114600 | 0.51683000  |
| C | 4.21404700  | -2.28300600 | 0.20673300  | N | -1.43261400 | -4.50451700 | 1.18081800  |
| C | 5.09581900  | -2.19411000 | 2.17395000  | N | -3.57118300 | -4.59247300 | 0.51705700  |
| C | 5.16049800  | -3.55204600 | 1.77179500  | N | -4.50492500 | 1.43269600  | 1.17994200  |
| C | 5.59317500  | -1.81153100 | 3.43017300  | N | -4.59315000 | 3.57117500  | 0.51595100  |
| C | 5.70903000  | -4.55159600 | 2.58266600  | H | 4.38469300  | 4.40233800  | -0.05398200 |
| C | 6.14016800  | -2.80144700 | 4.24340400  | H | 4.40248900  | -4.38454600 | -0.05286800 |
| H | 5.54866200  | -0.77484200 | 3.75122600  | H | -4.38452300 | -4.40240700 | -0.05275800 |
| C | 6.19729900  | -4.15103200 | 3.82574900  | H | -4.40317200 | 4.38448300  | -0.05393300 |
| H | 5.75264900  | -5.58819400 | 2.26235800  | H | 4.89418300  | 6.63214100  | 4.48788900  |
| C | -2.28301900 | -4.21386900 | 0.20705200  | H | -6.63280000 | 4.89372300  | 4.48804800  |
| C | -2.19432200 | -5.09537300 | 2.17440200  | H | -4.89371700 | -6.63106200 | 4.48970500  |
| C | -3.55221100 | -5.16013700 | 1.77210400  | H | 6.63179000  | -4.89327600 | 4.48933400  |
| C | -1.81187300 | -5.59254100 | 3.43073900  | H | -2.53532300 | -6.53151300 | 5.22137700  |
| C | -4.55184200 | -5.70857200 | 2.58294200  | H | -6.53291300 | 2.53542900  | 5.21999700  |
| C | -2.80187000 | -6.13943500 | 4.24393800  | H | 2.53581100  | 6.53290800  | 5.21967600  |

H 6.53239100 -2.53479800 5.22075600

8a

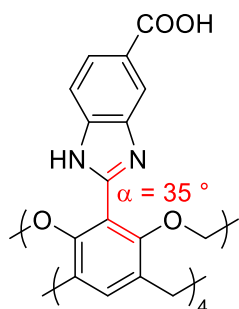

Energy = -4104.9306 Hartree

Number of imaginary frequencies 0

| Symbol | X           | Y           | Z           |
|--------|-------------|-------------|-------------|
| O      | -2.74669500 | 3.86351000  | -2.03048900 |
| O      | 4.27661800  | -2.05696500 | -1.99628500 |
| O      | 3.86352300  | 2.74635200  | -2.03025500 |
| O      | 2.05661000  | 4.27617700  | -1.99619700 |
| O      | -2.05683000 | -4.27640000 | -1.99560600 |
| O      | 2.74651800  | -3.86366800 | -2.02984100 |
| O      | -3.86367500 | -2.74646200 | -2.02983200 |
| O      | -4.27669900 | 2.05684500  | -1.99634200 |
| C      | 3.38003800  | -2.87817400 | -1.23708200 |
| H      | 2.64307000  | -2.25615100 | -0.72383400 |
| H      | 4.01088300  | -3.41741100 | -0.53152200 |
| C      | 2.87801400  | 3.37950400  | -1.23726600 |
| H      | 3.41712900  | 4.01027400  | -0.53154300 |
| H      | 2.25606200  | 2.64233700  | -0.72421500 |
| C      | -2.87822400 | -3.37967900 | -1.23678000 |
| H      | -2.25632100 | -2.64251000 | -0.72367100 |
| H      | -3.41747400 | -4.01038400 | -0.53110300 |
| C      | -3.38010100 | 2.87824400  | -1.23737800 |
| H      | -2.64305500 | 2.25638600  | -0.72401900 |
| H      | -4.01092000 | 3.41765600  | -0.53192700 |
| C      | 0.97594700  | 3.08814600  | -3.79068800 |
| C      | -2.65808200 | -0.21622200 | -4.38021600 |

|   |             |             |             |
|---|-------------|-------------|-------------|
| H | -2.12384800 | -0.16934900 | -5.32593600 |
| C | 1.46363100  | -2.87832400 | -3.79231900 |
| C | 2.31623300  | 2.73206100  | -4.41063600 |
| H | 3.02222600  | 3.55571900  | -4.27294600 |
| H | 2.18035000  | 2.57635300  | -5.48426300 |
| C | 1.51289400  | -3.56765000 | -2.57323600 |
| C | 3.08839200  | -0.97630600 | -3.79062000 |
| C | -1.51305900 | 3.56741000  | -2.57375300 |
| C | -0.21616400 | 2.65770900  | -4.38041700 |
| H | -0.16918200 | 2.12353200  | -5.32616300 |
| C | 3.78169200  | -0.89889000 | -2.57561500 |
| C | 3.56764100  | 1.51273400  | -2.57375300 |
| C | -3.56773300 | -1.51290600 | -2.57340600 |
| C | 0.21598200  | -2.65818400 | -4.37995700 |
| H | 0.16899300  | -2.12411500 | -5.32576600 |
| C | 0.89854200  | 3.78125600  | -2.57557000 |
| C | -3.08856800 | 0.97597200  | -3.79067000 |
| C | -0.97615100 | -3.08851100 | -3.79018900 |
| C | 2.65790700  | 0.21581100  | -4.38032800 |
| H | 2.12360700  | 0.16879700  | -5.32600200 |
| C | 0.33971400  | -4.04204400 | -1.94341500 |
| C | -2.73240100 | 2.31618900  | -4.41073800 |
| H | -3.55601000 | 3.02225200  | -4.27315600 |
| H | -2.57660600 | 2.18023800  | -5.48434500 |
| C | -2.87822300 | -1.46378200 | -3.79238800 |
| C | -3.78176700 | 0.89871500  | -2.57558300 |
| C | -4.04232400 | -0.33966900 | -1.94385600 |
| C | 2.87808600  | 1.46346600  | -3.79270000 |
| C | 2.73220700  | -2.31663400 | -4.41042800 |
| H | 3.55584100  | -3.02266000 | -4.27274400 |
| H | 2.57639800  | -2.18086900 | -5.48405500 |

|   |             |             |             |   |             |             |             |
|---|-------------|-------------|-------------|---|-------------|-------------|-------------|
| C | -0.33986600 | 4.04172900  | -1.94386300 | H | -5.06706300 | -2.39945100 | 2.86482300  |
| C | -1.46379700 | 2.87797300  | -3.79277200 | C | -7.48553800 | 0.05261000  | 2.93024600  |
| C | -2.31641300 | -2.73244500 | -4.41019800 | H | -7.90359100 | 1.49256900  | 1.37353200  |
| H | -3.02243600 | -3.55606900 | -4.27245000 | C | -0.40928100 | 4.77494100  | -0.66485000 |
| H | -2.18052400 | -2.57680900 | -5.48383400 | C | -0.96896800 | 5.47142600  | 1.29574900  |
| C | -0.89877200 | -3.78155500 | -2.57503000 | C | 0.12729500  | 6.27477600  | 0.88834200  |
| C | 4.04230200  | 0.33959400  | -1.94408000 | C | -1.56480500 | 5.67577300  | 2.54318200  |
| C | 4.77591900  | 0.40916100  | -0.66527800 | C | 0.65428400  | 7.29094000  | 1.69608900  |
| C | 5.47270800  | 0.96855000  | 1.29531900  | C | -1.04508600 | 6.68958300  | 3.35860700  |
| C | 6.27649200  | -0.12716500 | 0.88727300  | H | -2.40120600 | 5.06577500  | 2.86396800  |
| C | 5.67728600  | 1.56417700  | 2.54279300  | C | 0.05164700  | 7.48328600  | 2.93143200  |
| C | 7.29321400  | -0.65396900 | 1.69452800  | H | 1.49297900  | 7.90083600  | 1.37590400  |
| C | 6.69126300  | 1.04437200  | 3.35786300  | N | 5.80809400  | -0.45719800 | -0.35866800 |
| H | 5.06721400  | 2.40039700  | 2.86414600  | N | 4.55103200  | 1.27511100  | 0.30883100  |
| C | 7.48551400  | -0.05182700 | 2.93010600  | N | 1.27519600  | -4.55011400 | 0.30966600  |
| H | 7.90340000  | -1.49221900 | 1.37374500  | N | -0.45702600 | -5.80745400 | -0.35747700 |
| C | 0.40925100  | -4.77529800 | -0.66437700 | N | -4.55104600 | -1.27477100 | 0.30921500  |
| C | 0.96858300  | -5.47140800 | 1.29649600  | N | -5.80818400 | 0.45734900  | -0.35864500 |
| C | -0.12706500 | -6.27538400 | 0.88866100  | N | -1.27545000 | 4.54996400  | 0.30909000  |
| C | 1.56411400  | -5.67547900 | 2.54409600  | N | 0.45778200  | 5.80630700  | -0.35748600 |
| C | -0.65389000 | -7.29182100 | 1.69626000  | H | 6.10378600  | -1.23495500 | -0.93421600 |
| C | 1.04425700  | -6.68913700 | 3.35953000  | H | -1.23474300 | -6.10338900 | -0.93294200 |
| H | 2.40028800  | -5.06525200 | 2.86527700  | H | -6.10390200 | 1.23497500  | -0.93436500 |
| C | -0.05184900 | -7.48361900 | 2.93196600  | H | 1.23622500  | 6.10133500  | -0.93246600 |
| H | -1.49209400 | -7.90216000 | 1.37564700  | H | 8.25934900  | -0.41908900 | 3.59535800  |
| C | -4.77593300 | -0.40899900 | -0.66505200 | H | 0.41890800  | 8.25706200  | 3.59669600  |
| C | -5.47270100 | -0.96801700 | 1.29565900  | H | -8.25938600 | 0.41998000  | 3.59542400  |
| C | -6.27656200 | 0.12755000  | 0.88736900  | H | -0.41914900 | -8.25720500 | 3.59748900  |
| C | -5.67718800 | -1.56333800 | 2.54329500  | C | -1.61959700 | 6.97102800  | 4.69481000  |
| C | -7.29331800 | 0.65446000  | 1.69451400  | O | -1.21701700 | 7.82878700  | 5.46702800  |
| C | -6.69115400 | -1.04338300 | 3.35828200  | O | -2.66283200 | 6.16661400  | 5.01760100  |

|   |             |             |            |
|---|-------------|-------------|------------|
| H | -2.96099000 | 6.42638600  | 5.90786900 |
| C | -6.97144200 | -1.61695600 | 4.69479500 |
| O | -7.83421000 | -1.21949800 | 5.46411700 |
| O | -6.16882100 | -2.66205700 | 5.01599200 |
| H | -6.43028700 | -2.96259800 | 5.90502100 |
| C | 1.61804400  | -6.96895700 | 4.69605100 |
| O | 1.22063700  | -7.83137200 | 5.46579400 |
| O | 2.66311200  | -6.16613700 | 5.01684300 |
| H | 2.96374600  | -6.42722300 | 5.90595200 |
| C | 6.97168000  | 1.61831100  | 4.69419600 |
| O | 7.83424600  | 1.22079400  | 5.46371400 |
| O | 6.16886800  | 2.66328100  | 5.01532000 |
| H | 6.43022900  | 2.96389000  | 5.90435700 |



9

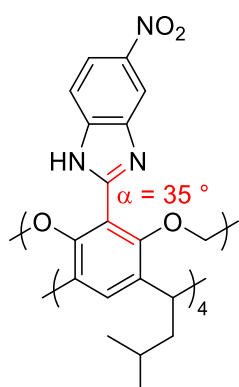

Energy = -4797.6826 Hartree

Number of imaginary frequencies 0

| Symbol | X           | Y           | Z           |
|--------|-------------|-------------|-------------|
| O      | -3.87842972 | -2.72134542 | -0.81256342 |
| O      | 2.07596617  | 4.25964802  | -0.78497898 |
| O      | -2.72134542 | 3.87842972  | -0.81256342 |
| O      | -4.25964802 | 2.07596617  | -0.78497898 |
| O      | 4.25964802  | -2.07596617 | -0.78497898 |
| O      | 3.87842972  | 2.72134542  | -0.81256342 |
| O      | 2.72134542  | -3.87842972 | -0.81256342 |
| O      | -2.07596617 | -4.25964802 | -0.78497898 |
| C      | 2.89351622  | 3.36118180  | -0.02383752 |
| H      | 2.26850844  | 2.62726067  | 0.49006504  |
| H      | 3.43454841  | 3.99091616  | 0.68110610  |
| C      | -3.36118180 | 2.89351622  | -0.02383752 |
| H      | -3.99091616 | 3.43454841  | 0.68110610  |
| H      | -2.62726067 | 2.26850844  | 0.49006504  |
| C      | 3.36118180  | -2.89351622 | -0.02383752 |
| H      | 2.62726067  | -2.26850844 | 0.49006504  |
| H      | 3.99091616  | -3.43454841 | 0.68110610  |
| C      | -2.89351622 | -3.36118180 | -0.02383752 |
| H      | -2.26850844 | -2.62726067 | 0.49006504  |
| H      | -3.43454841 | -3.99091616 | 0.68110610  |

|   |             |             |             |
|---|-------------|-------------|-------------|
| C | -3.06903245 | 0.99336682  | -2.58228851 |
| C | 0.20335145  | -2.63592665 | -3.16160135 |
| H | 0.16111881  | -2.09167056 | -4.09816002 |
| C | 2.87785597  | 1.45312826  | -2.58461055 |
| C | -2.75803826 | 2.36017901  | -3.19670437 |
| H | -3.54746897 | 3.03081329  | -2.85184933 |
| C | 3.56848007  | 1.49411362  | -1.36470937 |
| C | 0.99336682  | 3.06903245  | -2.58228851 |
| C | -3.56848007 | -1.49411362 | -1.36470937 |
| C | -2.63592665 | -0.20335145 | -3.16160135 |
| H | -2.09167056 | -0.16111881 | -4.09816002 |
| C | 0.91806899  | 3.76551609  | -1.36727304 |
| C | -1.49411362 | 3.56848007  | -1.36470937 |
| C | 1.49411362  | -3.56848007 | -1.36470937 |
| C | 2.63592665  | 0.20335145  | -3.16160135 |
| H | 2.09167056  | 0.16111881  | -4.09816002 |
| C | -3.76551609 | 0.91806899  | -1.36727304 |
| C | -0.99336682 | -3.06903245 | -2.58228851 |
| C | 3.06903245  | -0.99336682 | -2.58228851 |
| C | -0.20335145 | 2.63592665  | -3.16160135 |
| H | -0.16111881 | 2.09167056  | -4.09816002 |
| C | 4.03041111  | 0.31706771  | -0.73375478 |
| C | -2.36017901 | -2.75803826 | -3.19670437 |
| H | -3.03081329 | -3.54746897 | -2.85184933 |
| C | 1.45312826  | -2.87785597 | -2.58461055 |
| C | -0.91806899 | -3.76551609 | -1.36727304 |
| C | 0.31706771  | -4.03041111 | -0.73375478 |
| C | -1.45312826 | 2.87785597  | -2.58461055 |
| C | 2.36017901  | 2.75803826  | -3.19670437 |
| H | 3.03081329  | 3.54746897  | -2.85184933 |
| C | -4.03041111 | -0.31706771 | -0.73375478 |

|   |             |             |             |   |             |             |            |
|---|-------------|-------------|-------------|---|-------------|-------------|------------|
| C | -2.87785597 | -1.45312826 | -2.58461055 | H | -1.54309917 | -7.88554356 | 2.57233588 |
| C | 2.75803826  | -2.36017901 | -3.19670437 | C | -4.76450728 | -0.38051255 | 0.54497771 |
| H | 3.54746897  | -3.03081329 | -2.85184933 | C | -5.46886753 | -0.93662126 | 2.50204067 |
| C | 3.76551609  | -0.91806899 | -1.36727304 | C | -6.26657503 | 0.16593078  | 2.09242004 |
| C | -0.31706771 | 4.03041111  | -0.73375478 | C | -5.68029882 | -1.53441283 | 3.74464161 |
| C | -0.38051255 | 4.76450728  | 0.54497771  | C | -7.28335551 | 0.70027293  | 2.89452746 |
| C | -0.93662126 | 5.46886753  | 2.50204067  | C | -6.69706194 | -0.99336682 | 4.53219221 |
| C | 0.16593078  | 6.26657503  | 2.09242004  | H | -5.08873586 | -2.37559191 | 4.08378528 |
| C | -1.53441283 | 5.68029882  | 3.74464161  | C | -7.49197089 | 0.10316213  | 4.12920880 |
| C | 0.70027293  | 7.28335551  | 2.89452746  | H | -7.88554356 | 1.54309917  | 2.57233588 |
| C | -0.99336682 | 6.69706194  | 4.53219221  | N | 0.49195449  | 5.79404282  | 0.85044095 |
| H | -2.37559191 | 5.08873586  | 4.08378528  | N | -1.24850629 | 4.54796910  | 1.51862386 |
| C | 0.10316213  | 7.49197089  | 4.12920880  | N | 4.54796910  | 1.24850629  | 1.51862386 |
| H | 1.54309917  | 7.88554356  | 2.57233588  | N | 5.79404282  | -0.49195449 | 0.85044095 |
| C | 4.76450728  | 0.38051255  | 0.54497771  | N | 1.24850629  | -4.54796910 | 1.51862386 |
| C | 5.46886753  | 0.93662126  | 2.50204067  | N | -0.49195449 | -5.79404282 | 0.85044095 |
| C | 6.26657503  | -0.16593078 | 2.09242004  | N | -4.54796910 | -1.24850629 | 1.51862386 |
| C | 5.68029882  | 1.53441283  | 3.74464161  | N | -5.79404282 | 0.49195449  | 0.85044095 |
| C | 7.28335551  | -0.70027293 | 2.89452746  | H | 1.26983105  | 6.08768460  | 0.27339938 |
| C | 6.69706194  | 0.99336682  | 4.53219221  | H | 6.08768460  | -1.26983105 | 0.27339938 |
| H | 5.08873586  | 2.37559191  | 4.08378528  | H | -1.26983105 | -6.08768460 | 0.27339938 |
| C | 7.49197089  | -0.10316213 | 4.12920880  | H | -6.08768460 | 1.26983105  | 0.27339938 |
| H | 7.88554356  | -1.54309917 | 2.57233588  | H | 0.47115969  | 8.26328203  | 4.79351368 |
| C | 0.38051255  | -4.76450728 | 0.54497771  | H | -8.26328203 | 0.47115969  | 4.79351368 |
| C | 0.93662126  | -5.46886753 | 2.50204067  | H | -0.47115969 | -8.26328203 | 4.79351368 |
| C | -0.16593078 | -6.26657503 | 2.09242004  | H | 8.26328203  | -0.47115969 | 4.79351368 |
| C | 1.53441283  | -5.68029882 | 3.74464161  | N | -6.95400740 | -1.59176786 | 5.83785997 |
| C | -0.70027293 | -7.28335551 | 2.89452746  | O | -7.85855621 | -1.11647146 | 6.53722745 |
| C | 0.99336682  | -6.69706194 | 4.53219221  | O | -6.25837617 | -2.55165661 | 6.19489729 |
| H | 2.37559191  | -5.08873586 | 4.08378528  | N | 1.59176786  | -6.95400740 | 5.83785997 |
| C | -0.10316213 | -7.49197089 | 4.12920880  | O | 1.11647146  | -7.85855621 | 6.53722745 |

|   |             |             |             |   |             |             |             |
|---|-------------|-------------|-------------|---|-------------|-------------|-------------|
| O | 2.55165661  | -6.25837617 | 6.19489729  | C | -3.59695623 | -2.57489916 | -6.92434399 |
| N | 6.95400740  | 1.59176786  | 5.83785997  | H | -4.27258858 | -1.83413621 | -5.02961880 |
| O | 7.85855621  | 1.11647146  | 6.53722745  | H | -4.82571934 | -4.04377825 | -4.00305466 |
| O | 6.25837617  | 2.55165661  | 6.19489729  | H | -5.58677695 | -3.88894150 | -5.58727570 |
| N | -1.59176786 | 6.95400740  | 5.83785997  | H | -4.12896084 | -4.87802325 | -5.40326109 |
| O | -1.11647146 | 7.85855621  | 6.53722745  | H | -3.01927411 | -1.67904648 | -7.18214550 |
| O | -2.55165661 | 6.25837617  | 6.19489729  | H | -3.07893967 | -3.44189833 | -7.35515825 |
| C | 2.35918883  | 2.78913073  | -4.73973330 | H | -4.57399002 | -2.49506785 | -7.41492332 |
| H | 1.86503656  | 3.71842619  | -5.05333173 | C | -2.72711749 | 3.75228053  | -5.40317663 |
| H | 1.74907933  | 1.97160042  | -5.14029501 | C | -3.95228112 | 4.61979281  | -5.07468574 |
| C | -2.78913073 | 2.35918883  | -4.73973330 | C | -2.57489916 | 3.59695623  | -6.92434399 |
| H | -3.71842619 | 1.86503656  | -5.05333173 | H | -1.83413621 | 4.27258858  | -5.02961880 |
| H | -1.97160042 | 1.74907933  | -5.14029501 | H | -4.04377825 | 4.82571934  | -4.00305466 |
| C | -2.35918883 | -2.78913073 | -4.73973330 | H | -3.88894150 | 5.58677695  | -5.58727570 |
| H | -1.86503656 | -3.71842619 | -5.05333173 | H | -4.87802325 | 4.12896084  | -5.40326109 |
| H | -1.74907933 | -1.97160042 | -5.14029501 | H | -1.67904648 | 3.01927411  | -7.18214550 |
| C | 2.78913073  | -2.35918883 | -4.73973330 | H | -3.44189833 | 3.07893967  | -7.35515825 |
| H | 3.71842619  | -1.86503656 | -5.05333173 | H | -2.49506785 | 4.57399002  | -7.41492332 |
| H | 1.97160042  | -1.74907933 | -5.14029501 | C | 3.75228053  | 2.72711749  | -5.40317663 |
| C | 2.72711749  | -3.75228053 | -5.40317663 | C | 4.61979281  | 3.95228112  | -5.07468574 |
| C | 3.95228112  | -4.61979281 | -5.07468574 | C | 3.59695623  | 2.57489916  | -6.92434399 |
| C | 2.57489916  | -3.59695623 | -6.92434399 | H | 4.27258858  | 1.83413621  | -5.02961880 |
| H | 1.83413621  | -4.27258858 | -5.02961880 | H | 4.82571934  | 4.04377825  | -4.00305466 |
| H | 4.04377825  | -4.82571934 | -4.00305466 | H | 5.58677695  | 3.88894150  | -5.58727570 |
| H | 3.88894150  | -5.58677695 | -5.58727570 | H | 4.12896084  | 4.87802325  | -5.40326109 |
| H | 4.87802325  | -4.12896084 | -5.40326109 | H | 3.01927411  | 1.67904648  | -7.18214550 |
| H | 1.67904648  | -3.01927411 | -7.18214550 | H | 3.07893967  | 3.44189833  | -7.35515825 |
| H | 3.44189833  | -3.07893967 | -7.35515825 | H | 4.57399002  | 2.49506785  | -7.41492332 |
| H | 2.49506785  | -4.57399002 | -7.41492332 |   |             |             |             |
| C | -3.75228053 | -2.72711749 | -5.40317663 |   |             |             |             |
| C | -4.61979281 | -3.95228112 | -5.07468574 |   |             |             |             |

9a

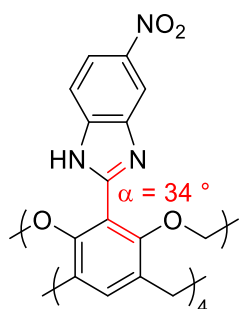

Energy = -4168.6208 Hartree

Number of imaginary frequencies 0

| Symbol | X           | Y           | Z           |
|--------|-------------|-------------|-------------|
| O      | 3.48957800  | 3.20967900  | -2.00319100 |
| O      | -1.50398400 | -4.50244500 | -1.97324200 |
| O      | 3.20980600  | -3.48962400 | -2.00336600 |
| O      | 4.50261700  | -1.50408700 | -1.97343700 |
| O      | -4.50256700 | 1.50407200  | -1.97338100 |
| O      | -3.48954800 | -3.20968000 | -2.00321900 |
| O      | -3.20974500 | 3.48960100  | -2.00328600 |
| O      | 1.50403700  | 4.50248300  | -1.97321800 |
| C      | -2.43136500 | -3.71661300 | -1.21274900 |
| H      | -1.90637300 | -2.90865700 | -0.69779300 |
| H      | -2.88715400 | -4.41095500 | -0.50834800 |
| C      | 3.71684400  | -2.43149000 | -1.21290400 |
| H      | 4.41125000  | -2.88732500 | -0.50859500 |
| H      | 2.90895600  | -1.90650200 | -0.69784000 |
| C      | -3.71677200 | 2.43144700  | -1.21284100 |
| H      | -2.90887500 | 1.90644100  | -0.69780700 |
| H      | -4.41116100 | 2.88726800  | -0.50850600 |
| C      | 2.43141300  | 3.71664500  | -1.21272100 |
| H      | 1.90641100  | 2.90870900  | -0.69774500 |
| H      | 2.88722000  | 4.41099400  | -0.50833800 |
| C      | 3.18612900  | -0.58055800 | -3.76474000 |
| C      | -0.54828500 | 2.60719400  | -4.35156800 |

|   |             |             |             |
|---|-------------|-------------|-------------|
| H | -0.43441900 | 2.08109300  | -5.29591500 |
| C | -2.67041000 | -1.81350600 | -3.76430600 |
| C | 3.00096400  | -1.95500500 | -4.38417100 |
| H | 3.90656800  | -2.55204100 | -4.24706200 |
| H | 2.82799400  | -1.84049900 | -5.45756600 |
| C | -3.34893200 | -1.94897900 | -2.54607800 |
| C | -0.58052900 | -3.18606000 | -3.76467700 |
| C | 3.34895200  | 1.94898000  | -2.54604800 |
| C | 2.60719700  | 0.54832100  | -4.35159800 |
| H | 2.08107100  | 0.43449200  | -5.29593600 |
| C | -0.41726600 | -3.86559400 | -2.55102800 |
| C | 1.94907400  | -3.34894000 | -2.54613800 |
| C | -1.94902000 | 3.34893100  | -2.54607800 |
| C | -2.60717100 | -0.54829200 | -4.35159700 |
| H | -2.08103700 | -0.43444400 | -5.29592700 |
| C | 3.86570400  | -0.41733800 | -2.55110900 |
| C | 0.58057400  | 3.18609900  | -3.76464600 |
| C | -3.18609700 | 0.58057800  | -3.76472200 |
| C | 0.54832900  | -2.60715900 | -4.35160300 |
| H | 0.43445600  | -2.08104900 | -5.29594400 |
| C | -3.96774000 | -0.84362800 | -1.91836400 |
| C | 1.95503500  | 3.00095100  | -4.38404600 |
| H | 2.55207400  | 3.90654600  | -4.24688400 |
| H | 1.84055100  | 2.82803100  | -5.45745000 |
| C | -1.81351600 | 2.67043100  | -3.76431400 |
| C | 0.41731500  | 3.86562400  | -2.55099100 |
| C | -0.84367400 | 3.96768100  | -1.91829400 |
| C | 1.81356400  | -2.67041600 | -3.76435900 |
| C | -1.95498900 | -3.00092000 | -4.38407800 |
| H | -2.55201600 | -3.90652600 | -4.24692500 |
| H | -1.84050000 | -2.82799100 | -5.45748000 |

|   |             |             |             |   |             |             |             |
|---|-------------|-------------|-------------|---|-------------|-------------|-------------|
| C | 3.96775800  | 0.84362000  | -1.91834000 | H | -3.04536100 | 4.76361500  | 2.88454200  |
| C | 2.67043800  | 1.81352300  | -3.76428200 | C | -0.87897700 | 7.45180500  | 2.94544500  |
| C | -3.00091500 | 1.95502900  | -4.38413500 | H | 0.51094600  | 8.02033000  | 1.39687700  |
| H | -3.90651700 | 2.55207200  | -4.24703200 | C | 4.68906700  | 1.00386300  | -0.64129600 |
| H | -2.82793800 | 1.84052100  | -5.45752700 | C | 5.31905800  | 1.65397800  | 1.31170200  |
| C | -3.86567800 | 0.41734000  | -2.55109700 | C | 6.24548400  | 0.65421900  | 0.90910300  |
| C | 0.84372600  | -3.96768800 | -1.91835300 | C | 5.45443000  | 2.28048800  | 2.55065600  |
| C | 1.00400100  | -4.68896100 | -0.64129300 | C | 7.31957500  | 0.25308100  | 1.71391800  |
| C | 1.65419900  | -5.31881000 | 1.31171200  | C | 6.52878100  | 1.87218100  | 3.34133700  |
| C | 0.65434800  | -6.24520700 | 0.90928300  | H | 4.76429400  | 3.04532300  | 2.88443500  |
| C | 2.28080100  | -5.45409200 | 2.55062200  | C | 7.45233400  | 0.87872600  | 2.94505700  |
| C | 0.25318200  | -7.31916000 | 1.71427600  | H | 8.02057200  | -0.51127300 | 1.39645600  |
| C | 1.87252000  | -6.52833500 | 3.34144300  | N | 0.26438000  | -5.81637600 | -0.33016100 |
| H | 3.04575300  | -4.76400900 | 2.88423000  | N | 1.84586600  | -4.36778300 | 0.32628600  |
| C | 0.87890900  | -7.45182300 | 2.94539500  | N | -4.36776900 | -1.84562100 | 0.32636600  |
| H | -0.51125800 | -8.02013300 | 1.39696700  | N | -5.81651300 | -0.26435300 | -0.33026200 |
| C | -4.68901300 | -1.00387800 | -0.64130000 | N | -1.84569500 | 4.36760000  | 0.32644600  |
| C | -5.31883200 | -1.65395000 | 1.31176100  | N | -0.26449400 | 5.81643700  | -0.33014200 |
| C | -6.24532700 | -0.65424100 | 0.90920800  | N | 4.36791900  | 1.84564100  | 0.32637800  |
| C | -5.45405000 | -2.28040400 | 2.55075600  | N | 5.81657000  | 0.26431800  | -0.33032000 |
| C | -7.31934300 | -0.25310600 | 1.71412500  | H | -0.47495300 | -6.20434000 | -0.90287000 |
| C | -6.52828300 | -1.87205800 | 3.34156500  | H | -6.20454000 | 0.47487500  | -0.90305700 |
| H | -4.76386800 | -3.04521500 | 2.88448300  | H | 0.47470900  | 6.20452500  | -0.90293000 |
| C | -7.45194200 | -0.87868300 | 2.94532400  | H | 6.20455400  | -0.47491300 | -0.90314000 |
| H | -8.02039600 | 0.51121700  | 1.39671100  | H | 0.61159700  | -8.26152300 | 3.61238000  |
| C | -1.00396300 | 4.68890900  | -0.64121000 | H | 8.26213900  | 0.61142900  | 3.61191000  |
| C | -1.65408700 | 5.31866000  | 1.31185600  | H | -0.61173100 | 8.26155700  | 3.61238700  |
| C | -0.65441200 | 6.24520600  | 0.90933500  | H | -8.26166700 | -0.61135800 | 3.61226800  |
| C | -2.28058200 | 5.45384100  | 2.55083500  | N | 6.70943800  | 2.50587900  | 4.64348800  |
| C | -0.25334700 | 7.31923400  | 1.71427000  | O | 7.66439000  | 2.14946900  | 5.34607500  |
| C | -1.87234500 | 6.52811800  | 3.34164100  | O | 5.90171600  | 3.37615900  | 4.99358800  |

|   |             |             |            |
|---|-------------|-------------|------------|
| N | -2.50605200 | 6.70852700  | 4.64389500 |
| O | -2.15057300 | 7.66406000  | 5.34622800 |
| O | -3.37709800 | 5.90135900  | 4.99351000 |
| N | -6.70866900 | -2.50565200 | 4.64387600 |
| O | -7.66463500 | -2.15065100 | 5.34586400 |
| O | -5.90190600 | -3.37717200 | 4.99324700 |
| N | 2.50640600  | -6.70887600 | 4.64355300 |
| O | 2.14875000  | -7.66265800 | 5.34712400 |
| O | 3.37564900  | -5.90022900 | 4.99418600 |

10

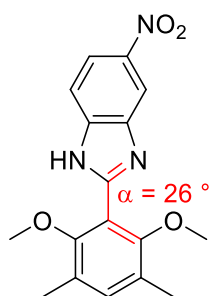

Energy = -918.67491 Hartree

Number of imaginary frequencies 0

| Symbol | X | Y | Z |
|--------|---|---|---|
|--------|---|---|---|

|   |             |             |             |
|---|-------------|-------------|-------------|
| C | 3.96678400  | -1.00321900 | -0.00611000 |
| C | 4.53653900  | 0.27106700  | -0.10240100 |
| H | 5.62037600  | 0.35569100  | -0.13319800 |
| C | 3.77093900  | 1.43901400  | -0.14550800 |
| C | 2.37205400  | 1.32649000  | -0.07939100 |
| O | 1.65079800  | 2.49349800  | -0.14089200 |
| C | 1.73949600  | 0.05898400  | -0.00449800 |
| C | 2.56892700  | -1.09136300 | 0.02857000  |
| C | 0.26947900  | -0.06824700 | 0.03916200  |
| C | -1.70451600 | -0.97955300 | 0.52783800  |
| C | -1.85122200 | 0.25549300  | -0.16065000 |
| C | -2.80110200 | -1.74845200 | 0.93959700  |
| C | -3.12238900 | 0.75038900  | -0.45318400 |
| C | -4.06409800 | -1.25339500 | 0.64796800  |
| H | -2.67720500 | -2.68993100 | 1.46419700  |
| C | -4.20573900 | -0.02534300 | -0.03674300 |
| H | -3.26447000 | 1.68759300  | -0.97681000 |
| N | -0.61090500 | 0.79317500  | -0.44561900 |
| N | -0.35333900 | -1.15228100 | 0.64014000  |
| H | 0.13967200  | -1.95385300 | 1.01529100  |
| O | 1.99192700  | -2.34702300 | 0.14832000  |
| C | 4.42283500  | 2.79529400  | -0.25851100 |

|   |             |             |             |
|---|-------------|-------------|-------------|
| H | 4.11387800  | 3.30904300  | -1.17581300 |
| H | 4.15200600  | 3.44957100  | 0.57711500  |
| H | 5.51183400  | 2.69590600  | -0.27253200 |
| C | 4.83527700  | -2.23566200 | 0.06631500  |
| H | 4.45565700  | -2.95000700 | 0.80302700  |
| H | 4.88373600  | -2.75844500 | -0.89666100 |
| H | 5.85794500  | -1.96310600 | 0.34206900  |
| H | -4.95020300 | -1.80174500 | 0.94097600  |
| N | -5.55247600 | 0.45519000  | -0.32252600 |
| O | -6.51566200 | -0.23016500 | 0.04812100  |
| O | -5.68191800 | 1.52951900  | -0.92453000 |
| C | 1.15840100  | 2.99411700  | 1.11150300  |
| H | 0.43336300  | 2.30835800  | 1.56116100  |
| H | 1.98259000  | 3.16937400  | 1.81393100  |
| H | 0.66309400  | 3.94123200  | 0.88806400  |
| C | 1.77420300  | -3.04281100 | -1.09722300 |
| H | 1.05166600  | -2.50591700 | -1.72209300 |
| H | 2.71204600  | -3.16561200 | -1.64742400 |
| H | 1.37468600  | -4.02419300 | -0.83383000 |

11

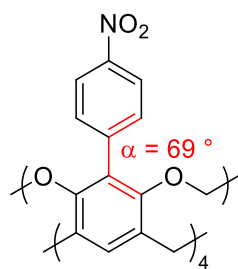

Energy = -3578.05 Hartree

Number of imaginary frequencies 0

Symbol X Y Z

|   |             |             |             |
|---|-------------|-------------|-------------|
| O | -4.25214300 | -2.12571400 | -1.21993600 |
| O | 2.66323900  | 3.90178000  | -1.17863500 |
| O | -2.12571400 | 4.25214300  | -1.21993600 |
| O | -3.90178000 | 2.66323900  | -1.17863500 |
| O | 3.90178000  | -2.66323900 | -1.17863500 |
| O | 4.25214300  | 2.12571400  | -1.21993600 |
| O | 2.12571400  | -4.25214300 | -1.21993600 |
| O | -2.66323900 | -3.90178000 | -1.17863500 |
| C | 3.34548200  | 2.89472600  | -0.44093400 |
| H | 2.62763400  | 2.23647800  | 0.05788300  |
| H | 3.96260900  | 3.43408500  | 0.27787200  |
| C | -2.89472600 | 3.34548200  | -0.44093400 |
| H | -3.43408500 | 3.96260900  | 0.27787200  |
| H | -2.23647800 | 2.62763400  | 0.05788300  |
| C | 2.89472600  | -3.34548200 | -0.44093400 |
| H | 2.23647800  | -2.62763400 | 0.05788300  |
| H | 3.43408500  | -3.96260900 | 0.27787200  |
| C | -3.34548200 | -2.89472600 | -0.44093400 |
| H | -2.62763400 | -2.23647800 | 0.05788300  |
| H | -3.96260900 | -3.43408500 | 0.27787200  |
| C | -2.89644400 | 1.42412000  | -2.99384600 |
| C | -0.18165500 | -2.66045500 | -3.58945000 |

|   |             |             |             |
|---|-------------|-------------|-------------|
| H | -0.14882500 | -2.12384200 | -4.53437700 |
| C | 3.07524500  | 1.02050800  | -3.00953100 |
| C | -2.35709200 | 2.69787100  | -3.62028800 |
| H | -3.07340500 | 3.51285800  | -3.48199100 |
| H | -2.22748500 | 2.53796900  | -4.69419800 |
| C | 3.77962800  | 0.95814600  | -1.80013800 |
| C | 1.42412000  | 2.89644400  | -2.99384600 |
| C | -3.77962800 | -0.95814600 | -1.80013800 |
| C | -2.66045500 | 0.18165500  | -3.58945000 |
| H | -2.12384200 | 0.14882500  | -4.53437700 |
| C | 1.45069000  | 3.58672900  | -1.77218500 |
| C | -0.95814600 | 3.77962800  | -1.80013800 |
| C | 0.95814600  | -3.77962800 | -1.80013800 |
| C | 2.66045500  | -0.18165500 | -3.58945000 |
| H | 2.12384200  | -0.14882500 | -4.53437700 |
| C | -3.58672900 | 1.45069000  | -1.77218500 |
| C | -1.42412000 | -2.89644400 | -2.99384600 |
| C | 2.89644400  | -1.42412000 | -2.99384600 |
| C | 0.18165500  | 2.66045500  | -3.58945000 |
| H | 0.14882500  | 2.12384200  | -4.53437700 |
| C | 4.06407900  | -0.26924100 | -1.17164400 |
| C | -2.69787100 | -2.35709200 | -3.62028800 |
| H | -3.51285800 | -3.07340500 | -3.48199100 |
| H | -2.53796900 | -2.22748500 | -4.69419800 |
| C | 1.02050800  | -3.07524500 | -3.00953100 |
| C | -1.45069000 | -3.58672900 | -1.77218500 |
| C | -0.26924100 | -4.06407900 | -1.17164400 |
| C | -1.02050800 | 3.07524500  | -3.00953100 |
| C | 2.69787100  | 2.35709200  | -3.62028800 |
| H | 3.51285800  | 3.07340500  | -3.48199100 |
| H | 2.53796900  | 2.22748500  | -4.69419800 |



|   |             |             |             |   |             |             |             |
|---|-------------|-------------|-------------|---|-------------|-------------|-------------|
| C | -4.06407900 | 0.26924100  | -1.17164400 | H | 0.29045700  | -6.70193800 | -0.88909500 |
| C | -3.07524500 | -1.02050800 | -3.00953100 | C | -0.69872900 | -5.04176800 | 2.48244300  |
| C | 2.35709200  | -2.69787100 | -3.62028800 | H | -0.90324700 | -3.22926900 | 1.36118400  |
| H | 3.07340500  | -3.51285800 | -3.48199100 | C | -0.37387900 | -6.39745200 | 2.41350200  |
| H | 2.22748500  | -2.53796900 | -4.69419800 | H | 0.23006800  | -8.06307300 | 1.18250900  |
| C | 3.58672900  | -1.45069000 | -1.77218500 | H | -0.96911800 | -4.59076100 | 3.42924100  |
| C | 0.26924100  | 4.06407900  | -1.17164400 | C | -4.86989100 | 0.30887400  | 0.08526300  |
| C | 0.30887400  | 4.86989100  | 0.08526300  | C | -6.23720700 | -0.01568500 | 0.05211400  |
| C | 0.66340500  | 4.28640700  | 1.31311900  | C | -4.28640700 | 0.66340500  | 1.31311900  |
| C | -0.01568500 | 6.23720700  | 0.05211400  | C | -7.00867200 | 0.01568500  | 1.20988200  |
| C | 0.69872900  | 5.04176800  | 2.48244300  | H | -6.70193800 | -0.29045700 | -0.88909500 |
| H | 0.90324700  | 3.22926900  | 1.36118400  | C | -5.04176800 | 0.69872900  | 2.48244300  |
| C | 0.01568500  | 7.00867200  | 1.20988200  | H | -3.22926900 | 0.90324700  | 1.36118400  |
| H | -0.29045700 | 6.70193800  | -0.88909500 | C | -6.39745200 | 0.37387900  | 2.41350200  |
| C | 0.37387900  | 6.39745200  | 2.41350200  | H | -8.06307300 | -0.23006800 | 1.18250900  |
| H | 0.96911800  | 4.59076100  | 3.42924100  | H | -4.59076100 | 0.96911800  | 3.42924100  |
| H | -0.23006800 | 8.06307300  | 1.18250900  | N | 0.40684100  | 7.19983600  | 3.63888100  |
| C | 4.86989100  | -0.30887400 | 0.08526300  | O | 0.74692300  | 6.64752600  | 4.69112400  |
| C | 6.23720700  | 0.01568500  | 0.05211400  | O | 0.09238700  | 8.39260600  | 3.56606800  |
| C | 4.28640700  | -0.66340500 | 1.31311900  | N | 7.19983600  | -0.40684100 | 3.63888100  |
| C | 7.00867200  | -0.01568500 | 1.20988200  | O | 8.39260600  | -0.09238700 | 3.56606800  |
| H | 6.70193800  | 0.29045700  | -0.88909500 | O | 6.64752600  | -0.74692300 | 4.69112400  |
| C | 5.04176800  | -0.69872900 | 2.48244300  | N | -0.40684100 | -7.19983600 | 3.63888100  |
| H | 3.22926900  | -0.90324700 | 1.36118400  | O | -0.09238700 | -8.39260600 | 3.56606800  |
| C | 6.39745200  | -0.37387900 | 2.41350200  | O | -0.74692300 | -6.64752600 | 4.69112400  |
| H | 8.06307300  | 0.23006800  | 1.18250900  | N | -7.19983600 | 0.40684100  | 3.63888100  |
| H | 4.59076100  | -0.96911800 | 3.42924100  | O | -8.39260600 | 0.09238700  | 3.56606800  |
| C | -0.30887400 | -4.86989100 | 0.08526300  | O | -6.64752600 | 0.74692300  | 4.69112400  |
| C | 0.01568500  | -6.23720700 | 0.05211400  |   |             |             |             |
| C | -0.66340500 | -4.28640700 | 1.31311900  |   |             |             |             |
| C | -0.01568500 | -7.00867200 | 1.20988200  |   |             |             |             |

S6

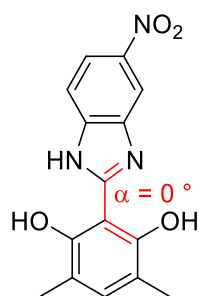

Energy = -840.10356 Hartree

Number of imaginary frequencies 0

| Symbol | X           | Y           | Z           |
|--------|-------------|-------------|-------------|
| C      | -4.18290000 | -0.91538700 | -0.00008000 |
| C      | -4.64892600 | 0.40787500  | -0.00000800 |
| H      | -5.72405900 | 0.57244300  | -0.00000300 |
| C      | -3.80806200 | 1.51974600  | 0.00001300  |
| C      | -2.41816800 | 1.29758800  | -0.00002200 |
| O      | -1.61916600 | 2.38550000  | 0.00001000  |
| C      | -1.88729000 | -0.02539900 | -0.00005100 |
| C      | -2.79975000 | -1.10881900 | -0.00008200 |
| C      | -0.44148600 | -0.20675900 | -0.00003100 |
| C      | 1.56773300  | -1.16704800 | 0.00005800  |
| C      | 1.68369100  | 0.24806600  | -0.00002200 |
| C      | 2.68320900  | -2.01175700 | 0.00013700  |
| C      | 2.93849500  | 0.85469600  | -0.00003600 |
| C      | 3.93376800  | -1.40829400 | 0.00012900  |
| H      | 2.58336300  | -3.09172600 | 0.00019800  |
| C      | 4.04176300  | -0.00120900 | 0.00004200  |
| H      | 3.05627500  | 1.93089500  | -0.00009600 |
| N      | 0.42180400  | 0.80981500  | -0.00007800 |
| N      | 0.21853400  | -1.41629300 | 0.00006300  |
| H      | -0.24180100 | -2.31823700 | 0.00001300  |
| O      | -2.26595400 | -2.37616600 | -0.00021700 |
| C      | -4.34640600 | 2.92763900  | 0.00008400  |

|   |             |             |             |
|---|-------------|-------------|-------------|
| H | -4.00854200 | 3.48820100  | 0.87976500  |
| H | -4.00824500 | 3.48840600  | -0.87934900 |
| H | -5.44013500 | 2.91959200  | -0.00009400 |
| C | -5.13300100 | -2.09034900 | -0.00013200 |
| H | -5.01068500 | -2.72711200 | -0.88724200 |
| H | -5.01105100 | -2.72690400 | 0.88718500  |
| H | -6.16790500 | -1.73882700 | -0.00036900 |
| H | 4.83338800  | -2.01010600 | 0.00018700  |
| H | -0.66759500 | 2.08000900  | 0.00000300  |
| H | -2.97278000 | -3.03928600 | 0.00066900  |
| N | 5.37619600  | 0.59091800  | 0.00003300  |
| O | 6.35731600  | -0.16441800 | 0.00023600  |
| O | 5.47380700  | 1.82483900  | -0.00015300 |

S7

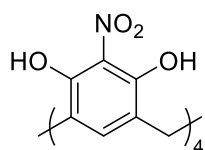

Energy = -2501.4659 Hartree

Number of imaginary frequencies 0

| Symbol | X           | Y           | Z           |
|--------|-------------|-------------|-------------|
| O      | 2.41007000  | -2.45254400 | -2.97110000 |
| O      | -2.38800300 | 5.02822000  | 1.00662300  |
| O      | 2.48105000  | 4.98327200  | 1.01258400  |
| O      | 2.46210100  | 2.41391800  | -2.96554300 |
| O      | -2.46210200 | -2.41391800 | -2.96554300 |
| O      | -2.41007100 | 2.45254400  | -2.97109900 |
| O      | -2.48105000 | -4.98327100 | 1.01258700  |
| O      | 2.38800300  | -5.02821900 | 1.00662500  |
| O      | 2.37746800  | -1.10001800 | -5.11032400 |
| C      | 2.52977400  | 1.21466400  | -0.94829300 |
| N      | 0.05824800  | 6.37179000  | 1.65472100  |
| C      | -0.02583000 | -2.60949500 | -0.16500200 |
| H      | -0.01772900 | -1.63396600 | -0.63903000 |
| C      | -2.50399900 | 1.25961100  | -0.95104500 |
| C      | 2.60187000  | 2.51028300  | -0.17333800 |
| H      | 3.23735000  | 3.22145800  | -0.71072200 |
| C      | -2.44813100 | 1.26613000  | -2.34980700 |
| O      | -1.02069800 | 6.95230800  | 1.92638000  |
| C      | -1.20522200 | 3.20649300  | 0.11941900  |
| C      | 2.44813000  | -1.26613000 | -2.34980800 |
| C      | 2.54688300  | -0.02350100 | -0.29912700 |
| H      | 2.60525600  | -0.02529000 | 0.78711800  |
| N      | 2.41165400  | -0.01739200 | -4.47792900 |
| C      | -1.20170200 | 4.46488700  | 0.73016500  |

|   |             |             |             |
|---|-------------|-------------|-------------|
| N | -2.41165500 | 0.01739300  | -4.47792900 |
| C | 1.28519800  | 4.44198800  | 0.73327300  |
| O | 1.02069800  | -6.95231100 | 1.92637400  |
| C | -1.28519800 | -4.44198800 | 0.73327500  |
| O | 1.14707400  | 6.93092800  | 1.93164200  |
| C | -2.54688400 | 0.02350000  | -0.29912700 |
| H | -2.60525600 | 0.02528900  | 0.78711900  |
| C | 2.47555700  | 1.22547400  | -2.34708400 |
| N | -0.05824800 | -6.37178900 | 1.65472300  |
| C | 1.20522200  | -3.20649400 | 0.11941900  |
| C | -2.52977500 | -1.21466400 | -0.94829300 |
| C | 0.02582900  | 2.60949400  | -0.16500200 |
| H | 0.01772800  | 1.63396500  | -0.63902800 |
| O | -2.37746000 | 1.10001900  | -5.11032300 |
| C | -2.44005200 | 0.01928300  | -3.06333700 |
| C | 2.55197300  | -2.55803400 | -0.17881900 |
| H | 3.17216000  | -3.28041000 | -0.71911800 |
| C | -1.26693700 | -3.18392300 | 0.12223900  |
| C | 1.20170200  | -4.46488700 | 0.73016600  |
| C | -0.04729100 | -5.09870100 | 1.04161000  |
| C | 1.26693700  | 3.18392300  | 0.12223900  |
| C | -2.55197300 | 2.55803300  | -0.17881700 |
| H | -3.17216100 | 3.28040900  | -0.71911600 |
| O | 2.41890200  | 1.06686600  | -5.10837400 |
| C | 2.44005100  | -0.01928300 | -3.06333800 |
| C | 2.50399800  | -1.25961100 | -0.95104600 |
| C | -2.60187100 | -2.51028400 | -0.17333800 |
| H | -3.23735000 | -3.22145900 | -0.71072200 |
| O | -2.41889400 | -1.06686600 | -5.10837300 |
| C | -2.47555800 | -1.22547400 | -2.34708400 |
| C | 0.04729100  | 5.09870200  | 1.04160700  |

O -1.14707400 -6.93093100 1.93163600  
H 2.44729300 2.24583000 -3.93793900  
H 2.31929800 5.86258900 1.42975700  
H -2.21102500 5.90495200 1.42307600  
H -2.39048700 2.28164200 -3.94294300  
H -2.44729600 -2.24582900 -3.93793900  
H -2.31929800 -5.86258700 1.42976200  
H 2.21102500 -5.90495000 1.42308100  
H 2.39048400 -2.28164100 -3.94294400  
H -3.06820100 2.37402300 0.77095000  
H 3.11195600 2.31446000 0.77739600  
H -3.11195600 -2.31446100 0.77739600  
H 3.06820100 -2.37402400 0.77094800

S8

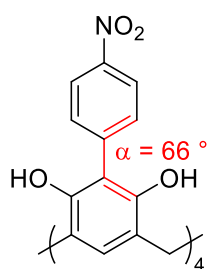

Energy = -3425.7431 Hartree

Number of imaginary frequencies 0

Symbol X Y Z

O 1.86337200 -4.57307800 -1.01246900  
 O -4.08447500 2.89582400 -1.22073400  
 O -4.57307800 -1.86337200 -1.01246900  
 O -2.89582400 -4.08447500 -1.22073400  
 O 2.89582400 4.08447500 -1.22073400  
 O -1.86337200 4.57307800 -1.01246900  
 O 4.57307800 1.86337200 -1.01246900  
 O 4.08447500 -2.89582400 -1.22073400  
 C -1.55209300 -2.89582400 -2.76405500  
 C 2.62089700 -0.27966900 -3.26994400  
 H 1.96082200 -0.20160700 -4.13032600  
 C -0.89834700 3.15447800 -2.73645000  
 C -2.79021500 -2.24187000 -3.36055500  
 H -3.64140500 -2.92876100 -3.30899600  
 H -2.60159500 -2.07099300 -4.42481700  
 C -0.78207500 4.01406900 -1.62782400  
 C -2.89582400 1.55209300 -2.76405500  
 C 0.78207500 -4.01406900 -1.62782400  
 C -0.27966900 -2.62089700 -3.26994400  
 H -0.20160700 -1.96082200 -4.13032600  
 C -3.78079200 1.62792700 -1.68119600  
 C -4.01406900 -0.78207500 -1.62782400

C 4.01406900 0.78207500 -1.62782400  
 C 0.27966900 2.62089700 -3.26994400  
 H 0.20160700 1.96082200 -4.13032600  
 C -1.62792700 -3.78079200 -1.68119600  
 C 2.89582400 -1.55209300 -2.76405500  
 C 1.55209300 2.89582400 -2.76405500  
 C -2.62089700 0.27966900 -3.26994400  
 H -1.96082200 0.20160700 -4.13032600  
 C 0.48340700 4.35099200 -1.09904900  
 C 2.24187000 -2.79021500 -3.36055500  
 H 2.92876100 -3.64140500 -3.30899600  
 H 2.07099300 -2.60159500 -4.42481700  
 C 3.15447800 0.89834700 -2.73645000  
 C 3.78079200 -1.62792700 -1.68119600  
 C 4.35099200 -0.48340700 -1.09904900  
 C -3.15447800 -0.89834700 -2.73645000  
 C -2.24187000 2.79021500 -3.36055500  
 H -2.92876100 3.64140500 -3.30899600  
 H -2.07099300 2.60159500 -4.42481700  
 C -0.48340700 -4.35099200 -1.09904900  
 C 0.89834700 -3.15447800 -2.73645000  
 C 2.79021500 2.24187000 -3.36055500  
 H 3.64140500 2.92876100 -3.30899600  
 H 2.60159500 2.07099300 -4.42481700  
 C 1.62792700 3.78079200 -1.68119600  
 C -4.35099200 0.48340700 -1.09904900  
 H -2.67424600 4.05200700 -1.17614400  
 H -4.70048600 2.85442000 -0.47083000  
 H -4.05200700 -2.67424600 -1.17614400  
 H -2.85442000 -4.70048600 -0.47083000  
 H 2.67424600 -4.05200700 -1.17614400

|   |             |             |             |   |             |             |             |
|---|-------------|-------------|-------------|---|-------------|-------------|-------------|
| H | 4.70048600  | -2.85442000 | -0.47083000 | H | 8.54557500  | -0.05128000 | 0.92298400  |
| H | 2.85442000  | 4.70048600  | -0.47083000 | H | 5.33959900  | -1.62865400 | 3.32679500  |
| H | 4.05200700  | 2.67424600  | -1.17614400 | C | 0.60184700  | 5.28144700  | 0.06117300  |
| C | -5.28144700 | 0.60184700  | 0.06117300  | C | 0.22129900  | 6.63138900  | -0.05797000 |
| C | -4.82741700 | 1.11121000  | 1.29279300  | C | 1.11121000  | 4.82741700  | 1.29279300  |
| C | -6.63138900 | 0.22129900  | -0.05797000 | C | 0.34243700  | 7.50650100  | 1.01600700  |
| C | -5.69208000 | 1.24302600  | 2.37816800  | H | -0.17077500 | 6.99731800  | -1.00083500 |
| H | -3.78346800 | 1.38542300  | 1.41350300  | C | 1.24302600  | 5.69208000  | 2.37816800  |
| C | -7.50650100 | 0.34243700  | 1.01600700  | H | 1.38542300  | 3.78346800  | 1.41350300  |
| H | -6.99731800 | -0.17077500 | -1.00083500 | C | 0.85586000  | 7.02282800  | 2.22238800  |
| C | -7.02282800 | 0.85586000  | 2.22238800  | H | 0.05128000  | 8.54557500  | 0.92298400  |
| H | -5.33959900 | 1.62865400  | 3.32679500  | H | 1.62865400  | 5.33959900  | 3.32679500  |
| H | -8.54557500 | 0.05128000  | 0.92298400  | N | -0.98983500 | -7.94020900 | 3.35790100  |
| C | -0.60184700 | -5.28144700 | 0.06117300  | O | -0.62525100 | -9.11126600 | 3.20896500  |
| C | -0.22129900 | -6.63138900 | -0.05797000 | O | -1.46162600 | -7.50104800 | 4.41204200  |
| C | -1.11121000 | -4.82741700 | 1.29279300  | N | -7.94020900 | 0.98983500  | 3.35790100  |
| C | -0.34243700 | -7.50650100 | 1.01600700  | O | -7.50104800 | 1.46162600  | 4.41204200  |
| H | 0.17077500  | -6.99731800 | -1.00083500 | O | -9.11126600 | 0.62525100  | 3.20896500  |
| C | -1.24302600 | -5.69208000 | 2.37816800  | N | 0.98983500  | 7.94020900  | 3.35790100  |
| H | -1.38542300 | -3.78346800 | 1.41350300  | O | 0.62525100  | 9.11126600  | 3.20896500  |
| C | -0.85586000 | -7.02282800 | 2.22238800  | O | 1.46162600  | 7.50104800  | 4.41204200  |
| H | -0.05128000 | -8.54557500 | 0.92298400  | N | 7.94020900  | -0.98983500 | 3.35790100  |
| H | -1.62865400 | -5.33959900 | 3.32679500  | O | 9.11126600  | -0.62525100 | 3.20896500  |
| C | 5.28144700  | -0.60184700 | 0.06117300  | O | 7.50104800  | -1.46162600 | 4.41204200  |
| C | 6.63138900  | -0.22129900 | -0.05797000 |   |             |             |             |
| C | 4.82741700  | -1.11121000 | 1.29279300  |   |             |             |             |
| C | 7.50650100  | -0.34243700 | 1.01600700  |   |             |             |             |
| H | 6.99731800  | 0.17077500  | -1.00083500 |   |             |             |             |
| C | 5.69208000  | -1.24302600 | 2.37816800  |   |             |             |             |
| H | 3.78346800  | -1.38542300 | 1.41350300  |   |             |             |             |
| C | 7.02282800  | -0.85586000 | 2.22238800  |   |             |             |             |

S9

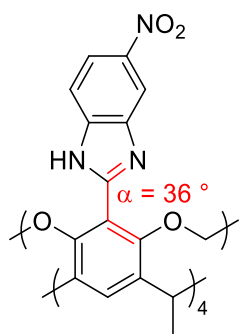

Energy = -4325.8749 Hartree

Number of imaginary frequencies 0

| Symbol | X           | Y           | Z           |
|--------|-------------|-------------|-------------|
| O      | -4.55305845 | 1.29935981  | -1.68450574 |
| O      | 4.61878997  | 1.06932612  | -1.65900112 |
| O      | 1.29935981  | 4.55305845  | -1.68450574 |
| O      | -1.06932612 | 4.61878997  | -1.65900112 |
| O      | 1.06932612  | -4.61878997 | -1.65900112 |
| O      | 4.55305845  | -1.29935981 | -1.68450574 |
| O      | -1.29935981 | -4.55305845 | -1.68450574 |
| O      | -4.61878997 | -1.06932612 | -1.65900112 |
| C      | 4.43402481  | -0.12997653 | -0.89658840 |
| H      | 3.47157396  | -0.10393070 | -0.38045962 |
| H      | 5.26551303  | -0.15506169 | -0.19354093 |
| C      | 0.12997653  | 4.43402481  | -0.89658840 |
| H      | 0.15506169  | 5.26551303  | -0.19354093 |
| H      | 0.10393070  | 3.47157396  | -0.38045962 |
| C      | -0.12997653 | -4.43402481 | -0.89658840 |
| H      | -0.10393070 | -3.47157396 | -0.38045962 |
| H      | -0.15506169 | -5.26551303 | -0.19354093 |
| C      | -4.43402481 | 0.12997653  | -0.89658840 |
| H      | -3.47157396 | 0.10393070  | -0.38045962 |
| H      | -5.26551303 | 0.15506169  | -0.19354093 |
| C      | -1.16359543 | 3.01532206  | -3.45874402 |
| C      | -1.92721494 | -1.82183383 | -4.04015333 |
| H      | -1.53778560 | -1.44867494 | -4.98036089 |
| C      | 2.93815215  | -1.32140097 | -3.45794767 |
| C      | 0.09896647  | 3.62290572  | -4.07345707 |
| H      | 0.13243979  | 4.66578534  | -3.74814021 |
| C      | 3.40459134  | -1.83049870 | -2.23694263 |
| C      | 3.01532206  | 1.16359543  | -3.45874402 |
| C      | -3.40459134 | 1.83049870  | -2.23694263 |
| C      | -1.82183383 | 1.92721494  | -4.04015333 |
| H      | -1.44867494 | 1.53778560  | -4.98036089 |
| C      | 3.50709161  | 1.65814559  | -2.24266019 |
| C      | 1.83049870  | 3.40459134  | -2.23694263 |
| C      | -1.83049870 | -3.40459134 | -2.23694263 |
| C      | 1.82183383  | -1.92721494 | -4.04015333 |
| H      | 1.44867494  | -1.53778560 | -4.98036089 |
| C      | -1.65814559 | 3.50709161  | -2.24266019 |
| C      | -3.01532206 | -1.16359543 | -3.45874402 |
| C      | 1.16359543  | -3.01532206 | -3.45874402 |
| C      | 1.92721494  | 1.82183383  | -4.04015333 |
| H      | 1.53778560  | 1.44867494  | -4.98036089 |
| C      | 2.78402651  | -2.93356673 | -1.60963300 |
| C      | -3.62290572 | 0.09896647  | -4.07345707 |
| H      | -4.66578534 | 0.13243979  | -3.74814021 |
| C      | -1.32140097 | -2.93815215 | -3.45794767 |
| C      | -3.50709161 | -1.65814559 | -2.24266019 |
| C      | -2.93356673 | -2.78402651 | -1.60963300 |
| C      | 1.32140097  | 2.93815215  | -3.45794767 |
| C      | 3.62290572  | -0.09896647 | -4.07345707 |
| H      | 4.66578534  | -0.13243979 | -3.74814021 |
| C      | -2.78402651 | 2.93356673  | -1.60963300 |
| C      | -2.93815215 | 1.32140097  | -3.45794767 |

|   |             |             |             |   |             |             |             |
|---|-------------|-------------|-------------|---|-------------|-------------|-------------|
| C | -0.09896647 | -3.62290572 | -4.07345707 | C | -3.30052402 | 3.46897284  | -0.33533853 |
| H | -0.13243979 | -4.66578534 | -3.74814021 | C | -4.17389151 | 3.67429070  | 1.62139521  |
| C | 1.65814559  | -3.50709161 | -2.24266019 | C | -3.84468909 | 4.98927564  | 1.19434255  |
| C | 2.93356673  | 2.78402651  | -1.60963300 | C | -4.76399753 | 3.46718890  | 2.86839550  |
| C | 3.46897284  | 3.30052402  | -0.33533853 | C | -4.08799114 | 6.12158195  | 1.98265064  |
| C | 3.67429070  | 4.17389151  | 1.62139521  | C | -5.00236519 | 4.60352926  | 3.64196224  |
| C | 4.98927564  | 3.84468909  | 1.19434255  | H | -5.02631306 | 2.47759636  | 3.22113991  |
| C | 3.46718890  | 4.76399753  | 2.86839550  | C | -4.67596308 | 5.91249158  | 3.22163544  |
| C | 6.12158195  | 4.08799114  | 1.98265064  | H | -3.83206531 | 7.12078099  | 1.64658432  |
| C | 4.60352926  | 5.00236519  | 3.64196224  | N | 4.82184145  | 3.29434566  | -0.04718587 |
| H | 2.47759636  | 5.02631306  | 3.22113991  | N | 2.75645345  | 3.82323492  | 0.64795057  |
| C | 5.91249158  | 4.67596308  | 3.22163544  | N | 3.82323492  | -2.75645345 | 0.64795057  |
| H | 7.12078099  | 3.83206531  | 1.64658432  | N | 3.29434566  | -4.82184145 | -0.04718587 |
| C | 3.30052402  | -3.46897284 | -0.33533853 | N | -2.75645345 | -3.82323492 | 0.64795057  |
| C | 4.17389151  | -3.67429070 | 1.62139521  | N | -4.82184145 | -3.29434566 | -0.04718587 |
| C | 3.84468909  | -4.98927564 | 1.19434255  | N | -3.82323492 | 2.75645345  | 0.64795057  |
| C | 4.76399753  | -3.46718890 | 2.86839550  | N | -3.29434566 | 4.82184145  | -0.04718587 |
| C | 4.08799114  | -6.12158195 | 1.98265064  | H | 5.54111504  | 2.89497075  | -0.63652107 |
| C | 5.00236519  | -4.60352926 | 3.64196224  | H | 2.89497075  | -5.54111504 | -0.63652107 |
| H | 5.02631306  | -2.47759636 | 3.22113991  | H | -5.54111504 | -2.89497075 | -0.63652107 |
| C | 4.67596308  | -5.91249158 | 3.22163544  | H | -2.89497075 | 5.54111504  | -0.63652107 |
| H | 3.83206531  | -7.12078099 | 1.64658432  | H | 6.74798409  | 4.88958805  | 3.87575925  |
| C | -3.46897284 | -3.30052402 | -0.33533853 | H | -4.88958805 | 6.74798409  | 3.87575925  |
| C | -3.67429070 | -4.17389151 | 1.62139521  | H | -6.74798409 | -4.88958805 | 3.87575925  |
| C | -4.98927564 | -3.84468909 | 1.19434255  | H | 4.88958805  | -6.74798409 | 3.87575925  |
| C | -3.46718890 | -4.76399753 | 2.86839550  | N | -5.62443887 | 4.43150210  | 4.95070867  |
| C | -6.12158195 | -4.08799114 | 1.98265064  | O | -5.84170598 | 5.43846953  | 5.63775186  |
| C | -4.60352926 | -5.00236519 | 3.64196224  | O | -5.91249158 | 3.28601596  | 5.32149315  |
| H | -2.47759636 | -5.02631306 | 3.22113991  | N | -4.43150210 | -5.62443887 | 4.95070867  |
| C | -5.91249158 | -4.67596308 | 3.22163544  | O | -5.43846953 | -5.84170598 | 5.63775186  |
| H | -7.12078099 | -3.83206531 | 1.64658432  | O | -3.28601596 | -5.91249158 | 5.32149315  |



N 5.62443887 -4.43150210 4.95070867  
O 5.84170598 -5.43846953 5.63775186  
O 5.91249158 -3.28601596 5.32149315  
N 4.43150210 5.62443887 4.95070867  
O 5.43846953 5.84170598 5.63775186  
O 3.28601596 5.91249158 5.32149315  
C 3.62966213 -0.09683311 -5.60920629  
H 4.18649024 0.77120802 -5.97660252  
H 4.12553132 -0.99975722 -5.97985357  
H 2.63100262 -0.06118461 -6.05248595  
C 0.09683311 3.62966213 -5.60920629  
H -0.77120802 4.18649024 -5.97660252  
H 0.99975722 4.12553132 -5.97985357  
H 0.06118461 2.63100262 -6.05248595  
C -3.62966213 0.09683311 -5.60920629  
H -4.18649024 -0.77120802 -5.97660252  
H -4.12553132 0.99975722 -5.97985357  
H -2.63100262 0.06118461 -6.05248595  
C -0.09683311 -3.62966213 -5.60920629  
H 0.77120802 -4.18649024 -5.97660252  
H -0.99975722 -4.12553132 -5.97985357  
H -0.06118461 -2.63100262 -6.05248595

6a-Br<sup>-</sup>

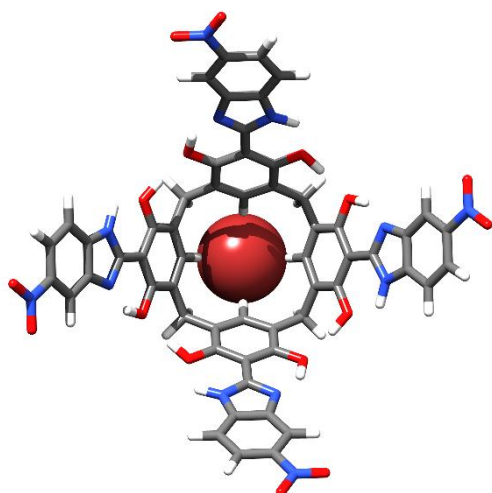

Energy = -6588.2928 Hartree

Number of imaginary frequencies 0

| Symbol | X           | Y           | Z          |
|--------|-------------|-------------|------------|
| O      | 4.36424500  | -2.37880200 | 1.43347800 |
| O      | -2.41983900 | 4.26863400  | 1.26942400 |
| O      | 2.37880200  | 4.36424500  | 1.43347800 |
| O      | 4.26863400  | 2.41983900  | 1.26942400 |
| O      | -4.26863400 | -2.41983900 | 1.26942400 |
| O      | -4.36424500 | 2.37880200  | 1.43347800 |
| O      | -2.37880200 | -4.36424500 | 1.43347800 |
| O      | 2.41983900  | -4.26863400 | 1.26942400 |
| C      | 3.01976100  | 1.26813800  | 2.99365300 |
| C      | 0.03233200  | -2.64656400 | 3.53850100 |
| H      | 0.02992000  | -1.97872500 | 4.40029000 |
| C      | -3.06446300 | 1.19474600  | 3.02088500 |
| C      | 2.50037000  | 2.55944200  | 3.61989700 |
| H      | 3.26542000  | 3.34129900  | 3.56612200 |
| H      | 2.33070100  | 2.36512900  | 4.68209100 |
| C      | -3.93652000 | 1.17821500  | 1.92619700 |
| C      | -1.26813800 | 3.01976100  | 2.99365300 |
| C      | 3.93652000  | -1.17821500 | 1.92619700 |

|   |             |             |            |
|---|-------------|-------------|------------|
| C | 2.64656400  | 0.03233200  | 3.53850100 |
| H | 1.97872500  | 0.02992000  | 4.40029000 |
| C | -1.26257000 | 3.86366500  | 1.87475200 |
| C | 1.17821500  | 3.93652000  | 1.92619700 |
| C | -1.17821500 | -3.93652000 | 1.92619700 |
| C | -2.64656400 | -0.03233200 | 3.53850100 |
| H | -1.97872500 | -0.02992000 | 4.40029000 |
| C | 3.86366500  | 1.26257000  | 1.87475200 |
| C | 1.26813800  | -3.01976100 | 2.99365300 |
| C | -3.01976100 | -1.26813800 | 2.99365300 |
| C | -0.03233200 | 2.64656400  | 3.53850100 |
| H | -0.02992000 | 1.97872500  | 4.40029000 |
| C | -4.35612200 | -0.04521800 | 1.33464100 |
| C | 2.55944200  | -2.50037000 | 3.61989700 |
| H | 3.34129900  | -3.26542000 | 3.56612200 |
| H | 2.36512900  | -2.33070100 | 4.68209100 |
| C | -1.19474600 | -3.06446300 | 3.02088500 |
| C | 1.26257000  | -3.86366500 | 1.87475200 |
| C | 0.04521800  | -4.35612200 | 1.33464100 |
| C | 1.19474600  | 3.06446300  | 3.02088500 |
| C | -2.55944200 | 2.50037000  | 3.61989700 |
| H | -3.34129900 | 3.26542000  | 3.56612200 |
| H | -2.36512900 | 2.33070100  | 4.68209100 |
| C | 4.35612200  | 0.04521800  | 1.33464100 |
| C | 3.06446300  | -1.19474600 | 3.02088500 |
| C | -2.50037000 | -2.55944200 | 3.61989700 |
| H | -3.26542000 | -3.34129900 | 3.56612200 |
| H | -2.33070100 | -2.36512900 | 4.68209100 |
| C | -3.86366500 | -1.26257000 | 1.87475200 |
| C | -0.04521800 | 4.35612200  | 1.33464100 |
| C | 0.00000000  | 5.25349700  | 0.18910100 |

|   |             |             |             |   |             |             |             |
|---|-------------|-------------|-------------|---|-------------|-------------|-------------|
| C | 0.77866300  | 6.53612600  | -1.38468900 | C | 8.01035500  | -0.89012300 | -3.23861000 |
| C | -0.63718600 | 6.55556000  | -1.49833800 | H | 7.27998200  | -2.64873600 | -2.20066500 |
| C | 1.56802800  | 7.27374100  | -2.26448500 | C | 8.03271000  | 0.51580200  | -3.35819900 |
| C | -1.30172600 | 7.29766800  | -2.48078900 | H | 7.30299700  | 2.38352000  | -2.55916000 |
| C | 0.89012300  | 8.01035500  | -3.23861000 | N | -1.08979400 | 5.73923100  | -0.49350200 |
| H | 2.64873600  | 7.27998200  | -2.20066500 | N | 1.13849600  | 5.71963700  | -0.32952200 |
| C | -0.51580200 | 8.03271000  | -3.35819900 | N | -5.71963700 | 1.13849600  | -0.32952200 |
| H | -2.38352000 | 7.30299700  | -2.55916000 | N | -5.73923100 | -1.08979400 | -0.49350200 |
| C | -5.25349700 | 0.00000000  | 0.18910100  | N | -1.13849600 | -5.71963700 | -0.32952200 |
| C | -6.53612600 | 0.77866300  | -1.38468900 | N | 1.08979400  | -5.73923100 | -0.49350200 |
| C | -6.55556000 | -0.63718600 | -1.49833800 | N | 5.71963700  | -1.13849600 | -0.32952200 |
| C | -7.27374100 | 1.56802800  | -2.26448500 | N | 5.73923100  | 1.08979400  | -0.49350200 |
| C | -7.29766800 | -1.30172600 | -2.48078900 | H | -2.04638200 | 5.49938600  | -0.25903400 |
| C | -8.01035500 | 0.89012300  | -3.23861000 | H | -5.49938600 | -2.04638200 | -0.25903400 |
| H | -7.27998200 | 2.64873600  | -2.20066500 | H | 2.04638200  | -5.49938600 | -0.25903400 |
| C | -8.03271000 | -0.51580200 | -3.35819900 | H | 5.49938600  | 2.04638200  | -0.25903400 |
| H | -7.30299700 | -2.38352000 | -2.55916000 | H | 2.20297000  | 4.97649700  | 0.64784500  |
| C | 0.00000000  | -5.25349700 | 0.18910100  | H | 3.62231700  | 3.15256900  | 1.40484900  |
| C | -0.77866300 | -6.53612600 | -1.38468900 | H | -3.15256900 | 3.62231700  | 1.40484900  |
| C | 0.63718600  | -6.55556000 | -1.49833800 | H | -4.97649700 | 2.20297000  | 0.64784500  |
| C | -1.56802800 | -7.27374100 | -2.26448500 | H | -3.62231700 | -3.15256900 | 1.40484900  |
| C | 1.30172600  | -7.29766800 | -2.48078900 | H | -2.20297000 | -4.97649700 | 0.64784500  |
| C | -0.89012300 | -8.01035500 | -3.23861000 | H | 3.15256900  | -3.62231700 | 1.40484900  |
| H | -2.64873600 | -7.27998200 | -2.20066500 | H | 4.97649700  | -2.20297000 | 0.64784500  |
| C | 0.51580200  | -8.03271000 | -3.35819900 | H | -0.97342700 | 8.62647900  | -4.13897900 |
| H | 2.38352000  | -7.30299700 | -2.55916000 | H | -8.62647900 | -0.97342700 | -4.13897900 |
| C | 5.25349700  | 0.00000000  | 0.18910100  | H | 0.97342700  | -8.62647900 | -4.13897900 |
| C | 6.53612600  | -0.77866300 | -1.38468900 | H | 8.62647900  | 0.97342700  | -4.13897900 |
| C | 6.55556000  | 0.63718600  | -1.49833800 | N | -8.79823400 | 1.67769700  | -4.18088800 |
| C | 7.27374100  | -1.56802800 | -2.26448500 | O | -9.45595600 | 1.08156600  | -5.04411100 |
| C | 7.29766800  | 1.30172600  | -2.48078900 | O | -8.77778000 | 2.91150400  | -4.08000600 |

N -1.67769700 -8.79823400 -4.18088800  
O -1.08156600 -9.45595600 -5.04411100  
O -2.91150400 -8.77778000 -4.08000600  
N 8.79823400 -1.67769700 -4.18088800  
O 9.45595600 -1.08156600 -5.04411100  
O 8.77778000 -2.91150400 -4.08000600  
N 1.67769700 8.79823400 -4.18088800  
O 1.08156600 9.45595600 -5.04411100  
O 2.91150400 8.77778000 -4.08000600  
Br 0.00000000 0.00000000 6.31070200

6a·(Br<sup>-</sup>)<sub>2</sub>

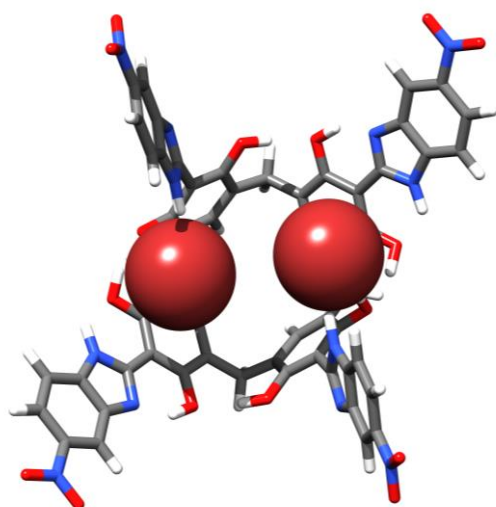

Energy = -9160.1678 Hartree

Number of imaginary frequencies 0

Symbol X Y Z

|   |             |             |             |
|---|-------------|-------------|-------------|
| O | 3.98972100  | 1.49438800  | -1.34475500 |
| O | -3.35450500 | -4.00962300 | -2.11146400 |
| O | 1.33243400  | -5.11840000 | -2.19420100 |
| O | 3.25472600  | -3.22540200 | -1.41709500 |
| O | -3.25472600 | 3.22540200  | -1.41709500 |
| O | -3.98972100 | -1.49438800 | -1.34475500 |
| O | -1.33243400 | 5.11840000  | -2.19420100 |
| O | 3.35450500  | 4.00962300  | -2.11146400 |
| C | 2.59960000  | -1.91788800 | -3.35604000 |
| C | 0.54927700  | 2.58890100  | -3.98702700 |
| H | 0.36047300  | 1.79988900  | -4.71113000 |
| C | -3.05572700 | -0.50147900 | -3.32063000 |
| C | 1.93846700  | -3.09148700 | -4.06504700 |
| H | 2.54978500  | -3.99539200 | -3.97989000 |
| H | 1.88718700  | -2.85307400 | -5.13199800 |
| C | -3.57526700 | -0.36341600 | -2.02668300 |
| C | -1.85737500 | -2.76087000 | -3.52258400 |
| C | 3.57526700  | 0.36341600  | -2.02668300 |

|   |             |             |             |
|---|-------------|-------------|-------------|
| C | 2.59064100  | -0.65445900 | -3.95338200 |
| H | 2.17438200  | -0.56321100 | -4.95418500 |
| C | -2.09219300 | -3.78297600 | -2.59356600 |
| C | 0.27045800  | -4.38288300 | -2.63085700 |
| C | -0.27045800 | 4.38288300  | -2.63085700 |
| C | -2.59064100 | 0.65445900  | -3.95338200 |
| H | -2.17438200 | 0.56321100  | -4.95418500 |
| C | 3.17531000  | -2.03978000 | -2.07699100 |
| C | 1.85737500  | 2.76087000  | -3.52258400 |
| C | -2.59960000 | 1.91788800  | -3.35604000 |
| C | -0.54927700 | -2.58890100 | -3.98702700 |
| H | -0.36047300 | -1.79988900 | -4.71113000 |
| C | -3.69810500 | 0.90269700  | -1.41885900 |
| C | 2.96995300  | 1.85029800  | -4.02136400 |
| H | 3.93315500  | 2.36801900  | -3.95901700 |
| H | 2.79889500  | 1.65841000  | -5.08544000 |
| C | -0.52669900 | 3.37037200  | -3.56516200 |
| C | 2.09219300  | 3.78297600  | -2.59356600 |
| C | 1.04224400  | 4.61832700  | -2.14017300 |
| C | 0.52669900  | -3.37037200 | -3.56516200 |
| C | -2.96995300 | -1.85029800 | -4.02136400 |
| H | -3.93315500 | -2.36801900 | -3.95901700 |
| H | -2.79889500 | -1.65841000 | -5.08544000 |
| C | 3.69810500  | -0.90269700 | -1.41885900 |
| C | 3.05572700  | 0.50147900  | -3.32063000 |
| C | -1.93846700 | 3.09148700  | -4.06504700 |
| H | -2.54978500 | 3.99539200  | -3.97989000 |
| H | -1.88718700 | 2.85307400  | -5.13199800 |
| C | -3.17531000 | 2.03978000  | -2.07699100 |
| C | -1.04224400 | -4.61832700 | -2.14017300 |
| C | -1.24248600 | -5.65755600 | -1.14093500 |

|   |             |             |             |   |             |             |             |
|---|-------------|-------------|-------------|---|-------------|-------------|-------------|
| C | -0.83070500 | -7.26713900 | 0.25761000  | C | 6.95052300  | -1.90336100 | 3.45041500  |
| C | -2.21510700 | -6.96541500 | 0.36932200  | H | 7.58987000  | -2.90681500 | 1.63683000  |
| C | -0.26248500 | -8.27652700 | 1.03142800  | C | 6.03158900  | -1.03956600 | 4.09008100  |
| C | -3.06641000 | -7.66025000 | 1.23575800  | H | 4.27093100  | 0.18264100  | 3.85037100  |
| C | -1.12295900 | -8.95339800 | 1.89946000  | N | -2.43670900 | -5.95714200 | -0.53138500 |
| H | 0.78924000  | -8.52556200 | 0.96756300  | N | -0.25944400 | -6.43748000 | -0.68778700 |
| C | -2.49946200 | -8.66133800 | 2.01250400  | N | -5.49449400 | 1.81180100  | 0.03458600  |
| H | -4.12257600 | -7.42449500 | 1.30943800  | N | -4.01646400 | 0.44400200  | 1.03064500  |
| C | -4.41221500 | 1.06845700  | -0.13238800 | N | 0.25944400  | 6.43748000  | -0.68778700 |
| C | -5.82621700 | 1.67013900  | 1.37039000  | N | 2.43670900  | 5.95714200  | -0.53138500 |
| C | -4.90008900 | 0.79822900  | 2.00998000  | N | 5.49449400  | -1.81180100 | 0.03458600  |
| C | -6.87287000 | 2.23723400  | 2.09542000  | N | 4.01646400  | -0.44400200 | 1.03064500  |
| C | -4.98775700 | 0.47586300  | 3.37159300  | H | -3.29405700 | -5.44772700 | -0.71488400 |
| C | -6.95052300 | 1.90336100  | 3.45041500  | H | -3.22332100 | -0.21432200 | 1.11530700  |
| H | -7.58987000 | 2.90681500  | 1.63683000  | H | 3.29405700  | 5.44772700  | -0.71488400 |
| C | -6.03158900 | 1.03956600  | 4.09008100  | H | 3.22332100  | 0.21432200  | 1.11530700  |
| H | -4.27093100 | -0.18264100 | 3.85037100  | H | 0.99960900  | -5.78479400 | -1.51500000 |
| C | 1.24248600  | 5.65755600  | -1.14093500 | H | 2.64613800  | -3.90030300 | -1.77996600 |
| C | 0.83070500  | 7.26713900  | 0.25761000  | H | -3.78165700 | -3.13256800 | -1.95402500 |
| C | 2.21510700  | 6.96541500  | 0.36932200  | H | -3.34539800 | -1.65842000 | -0.58204200 |
| C | 0.26248500  | 8.27652700  | 1.03142800  | H | -2.64613800 | 3.90030300  | -1.77996600 |
| C | 3.06641000  | 7.66025000  | 1.23575800  | H | -0.99960900 | 5.78479400  | -1.51500000 |
| C | 1.12295900  | 8.95339800  | 1.89946000  | H | 3.78165700  | 3.13256800  | -1.95402500 |
| H | -0.78924000 | 8.52556200  | 0.96756300  | H | 3.34539800  | 1.65842000  | -0.58204200 |
| C | 2.49946200  | 8.66133800  | 2.01250400  | H | -3.10677000 | -9.22774100 | 2.70666700  |
| H | 4.12257600  | 7.42449500  | 1.30943800  | H | -6.15002600 | 0.82805400  | 5.14501200  |
| C | 4.41221500  | -1.06845700 | -0.13238800 | H | 3.10677000  | 9.22774100  | 2.70666700  |
| C | 5.82621700  | -1.67013900 | 1.37039000  | H | 6.15002600  | -0.82805400 | 5.14501200  |
| C | 4.90008900  | -0.79822900 | 2.00998000  | N | -8.02760300 | 2.47540600  | 4.24298700  |
| C | 6.87287000  | -2.23723400 | 2.09542000  | O | -8.09624000 | 2.18797400  | 5.44761500  |
| C | 4.98775700  | -0.47586300 | 3.37159300  | O | -8.83993700 | 3.22950100  | 3.68718800  |

N 0.57207500 10.01897700 2.72789500  
O 1.33243400 10.62331200 3.49736200  
O -0.63416100 10.28117200 2.62947700  
N 8.02760300 -2.47540600 4.24298700  
O 8.09624000 -2.18797400 5.44761500  
O 8.83993700 -3.22950100 3.68718800  
N -0.57207500 -10.01897700 2.72789500  
O -1.33243400 -10.62331200 3.49736200  
O 0.63416100 -10.28117200 2.62947700  
Br 1.79713100 1.92823900 0.82603300  
Br -1.79713100 -1.92823900 0.82603300

6a·(Cl)<sub>2</sub>

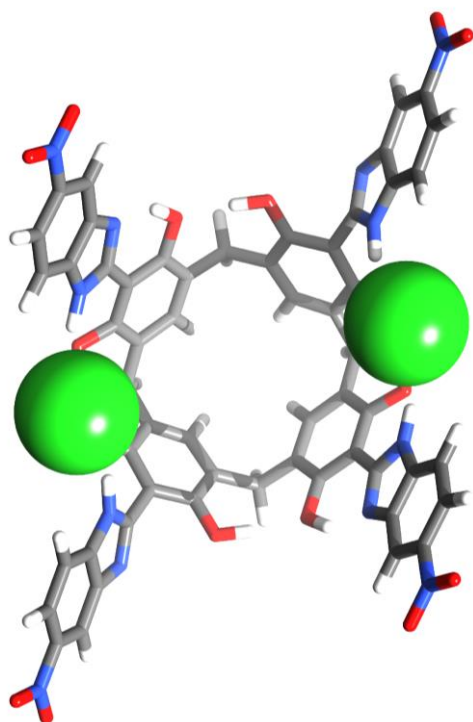

Energy = -4937.1027 Hartree

Number of imaginary frequencies 0

| Symbol | X           | Y           | Z           |
|--------|-------------|-------------|-------------|
| O      | -3.11722600 | 3.96527600  | -1.74648000 |
| O      | 4.61591200  | -1.66085900 | -1.60052200 |
| O      | 3.79551100  | 3.05087900  | -1.61782300 |
| O      | 1.61875500  | 4.76346900  | -1.62170200 |
| O      | -1.61875500 | -4.76346900 | -1.62170200 |
| O      | 3.11722600  | -3.96527600 | -1.74648000 |
| O      | -3.79551100 | -3.05087900 | -1.61782300 |
| O      | -4.61591200 | 1.66085900  | -1.60052200 |
| C      | 0.73042600  | 3.23843200  | -3.27923900 |
| C      | -2.58062800 | -0.42434600 | -3.81348300 |
| H      | -1.95971700 | -0.33264700 | -4.70160000 |
| C      | 1.70027300  | -2.84350100 | -3.29896000 |
| C      | 2.09492000  | 2.91653700  | -3.87992300 |
| H      | 2.75399500  | 3.78792800  | -3.81006200 |

|   |             |             |             |
|---|-------------|-------------|-------------|
| H | 1.94948700  | 2.72652300  | -4.94792100 |
| C | 1.84212400  | -3.74570300 | -2.23192600 |
| C | 3.15321200  | -0.73786500 | -3.28459500 |
| C | -1.84212400 | 3.74570300  | -2.23192600 |
| C | -0.41483600 | 2.63562500  | -3.80404800 |
| H | -0.29828400 | 1.95704600  | -4.64586700 |
| C | 3.96250100  | -0.60211800 | -2.14821000 |
| C | 3.59041400  | 1.80852900  | -2.13943000 |
| C | -3.59041400 | -1.80852900 | -2.13943000 |
| C | 0.41483600  | -2.63562500 | -3.80404800 |
| H | 0.29828400  | -1.95704600 | -4.64586700 |
| C | 0.56330200  | 4.14105800  | -2.21259000 |
| C | -3.15321200 | 0.73786500  | -3.28459500 |
| C | -0.73042600 | -3.23843200 | -3.27923900 |
| C | 2.58062800  | 0.42434600  | -3.81348300 |
| H | 1.95971700  | 0.33264700  | -4.70160000 |
| C | 0.73037200  | -4.45358700 | -1.72677300 |
| C | -2.88021600 | 2.09750600  | -3.91212600 |
| H | -3.77983400 | 2.72093600  | -3.87956500 |
| H | -2.65945500 | 1.94027300  | -4.97232300 |
| C | -2.77624300 | -1.69869300 | -3.27504000 |
| C | -3.96250100 | 0.60211800  | -2.14821000 |
| C | -4.16786400 | -0.65867300 | -1.53810600 |
| C | 2.77624300  | 1.69869300  | -3.27504000 |
| C | 2.88021600  | -2.09750600 | -3.91212600 |
| H | 3.77983400  | -2.72093600 | -3.87956500 |
| H | 2.65945500  | -1.94027300 | -4.97232300 |
| C | -0.73037200 | 4.45358700  | -1.72677300 |
| C | -1.70027300 | 2.84350100  | -3.29896000 |
| C | -2.09492000 | -2.91653700 | -3.87992300 |
| H | -2.75399500 | -3.78792800 | -3.81006200 |



|   |             |             |             |   |             |             |             |
|---|-------------|-------------|-------------|---|-------------|-------------|-------------|
| H | -1.94948700 | -2.72652300 | -4.94792100 | C | -0.79469400 | 7.57938200  | 0.03082600  |
| C | -0.56330200 | -4.14105800 | -2.21259000 | C | -1.42011700 | 6.76135400  | 1.01148600  |
| C | 4.16786400  | 0.65867300  | -1.53810600 | C | -0.60121900 | 8.93954900  | 0.26963200  |
| C | 4.87819900  | 0.80418300  | -0.27331500 | C | -1.86550300 | 7.26603900  | 2.24080000  |
| C | 5.79774800  | 1.74215400  | 1.45548500  | C | -1.05184400 | 9.42959400  | 1.49747200  |
| C | 5.75963300  | 0.34478500  | 1.71075500  | H | -0.12706900 | 9.58652800  | -0.45785200 |
| C | 6.34151300  | 2.61984900  | 2.39039300  | C | -1.67394500 | 8.61970500  | 2.47525400  |
| C | 6.25147400  | -0.21224500 | 2.89741000  | H | -2.34136400 | 6.63091500  | 2.98009900  |
| C | 6.83060600  | 2.04820700  | 3.56741400  | N | 5.18239200  | -0.21355700 | 0.59936500  |
| H | 6.38229300  | 3.68818700  | 2.22000100  | N | 5.24211500  | 1.99143100  | 0.21498500  |
| C | 6.79048300  | 0.66170600  | 3.83136300  | N | 0.47197200  | -6.82087000 | -1.07952400 |
| H | 6.21063700  | -1.27932000 | 3.08559900  | N | 1.44516400  | -5.50862800 | 0.46060100  |
| C | 0.87524000  | -5.59397400 | -0.79333800 | N | -5.24211500 | -1.99143100 | 0.21498500  |
| C | 0.79469400  | -7.57938200 | 0.03082600  | N | -5.18239200 | 0.21355700  | 0.59936500  |
| C | 1.42011700  | -6.76135400 | 1.01148600  | N | -0.47197200 | 6.82087000  | -1.07952400 |
| C | 0.60121900  | -8.93954900 | 0.26963200  | N | -1.44516400 | 5.50862800  | 0.46060100  |
| C | 1.86550300  | -7.26603900 | 2.24080000  | H | 4.92364800  | -1.19143100 | 0.46792000  |
| C | 1.05184400  | -9.42959400 | 1.49747200  | H | 1.91175200  | -4.68872800 | 0.86761100  |
| H | 0.12706900  | -9.58652800 | -0.45785200 | H | -4.92364800 | 1.19143100  | 0.46792000  |
| C | 1.67394500  | -8.61970500 | 2.47525400  | H | -1.91175200 | 4.68872800  | 0.86761100  |
| H | 2.34136400  | -6.63091500 | 2.98009900  | H | 4.40139000  | 2.96283300  | -0.81620200 |
| C | -4.87819900 | -0.80418300 | -0.27331500 | H | 2.42696100  | 4.21267200  | -1.69275800 |
| C | -5.79774800 | -1.74215400 | 1.45548500  | H | 4.15712500  | -2.50722600 | -1.79934500 |
| C | -5.75963300 | -0.34478500 | 1.71075500  | H | 3.16629700  | -3.92772900 | -0.75341700 |
| C | -6.34151300 | -2.61984900 | 2.39039300  | H | -2.42696100 | -4.21267200 | -1.69275800 |
| C | -6.25147400 | 0.21224500  | 2.89741000  | H | -4.40139000 | -2.96283300 | -0.81620200 |
| C | -6.83060600 | -2.04820700 | 3.56741400  | H | -4.15712500 | 2.50722600  | -1.79934500 |
| H | -6.38229300 | -3.68818700 | 2.22000100  | H | -3.16629700 | 3.92772900  | -0.75341700 |
| C | -6.79048300 | -0.66170600 | 3.83136300  | H | 7.18373500  | 0.28880300  | 4.76828300  |
| H | -6.21063700 | 1.27932000  | 3.08559900  | H | 1.99720000  | -9.06693600 | 3.40643400  |
| C | -0.87524000 | 5.59397400  | -0.79333800 | H | -7.18373500 | -0.28880300 | 4.76828300  |

|   |             |              |            |    |             |             |            |
|---|-------------|--------------|------------|----|-------------|-------------|------------|
| H | -1.99720000 | 9.06693600   | 3.40643400 | O  | -0.32391000 | 11.55958800 | 0.93263900 |
| N | 0.87524000  | -10.84642100 | 1.78320000 | N  | 7.41174300  | 2.92860400  | 4.57308800 |
| O | 1.28465000  | -11.28851200 | 2.86665300 | O  | 7.83549400  | 2.42819900  | 5.62440300 |
| O | 0.32391000  | -11.55958800 | 0.93263900 | O  | 7.46202000  | 4.14370500  | 4.33764400 |
| N | -7.41174300 | -2.92860400  | 4.57308800 | Cl | -3.61928900 | 3.33452900  | 1.22454800 |
| O | -7.83549400 | -2.42819900  | 5.62440300 | Cl | 3.61928900  | -3.33452900 | 1.22454800 |
| O | -7.46202000 | -4.14370500  | 4.33764400 |    |             |             |            |
| N | -0.87524000 | 10.84642100  | 1.78320000 |    |             |             |            |
| O | -1.28465000 | 11.28851200  | 2.86665300 |    |             |             |            |

## 6. References

- 
- <sup>1</sup> S. Miao, R. D. Adams, D.-S. Guo, Q.-F. Zhang, *J. Mol. Struct.*, 2003, **659**, 119 - 128.
- <sup>2</sup> M. Grajda, M. Wierzbicki, P. Cmoch, A. Szumna, *J. Org. Chem.*, 2013, **78**, 11597 - 11601.
- <sup>3</sup> P. Jurek, H. Jędrzejewska, M. R. Rode, A. Szumna, *Chem. Eur. J.*, 2023, **29**, e2022031
- <sup>4</sup> P. Jurek, M. F. Rode, M. P. Szymański, M. Banasiewicz, A. Szumna, *J. Mater. Chem. C*, 2023, **11**, 10642 - 10650.
- <sup>5</sup> M. J. Frisch, G. W. Trucks, H. B. Schlegel, G. E. Scuseria, M. A. Robb, J. R. Cheeseman, G. Scalmani, V. Barone, G. A. Petersson, H. Nakatsuji, X. Li, M. Caricato, A. V. Marenich, J. Bloino, B. G. Janesko, R. Gomperts, B. Mennucci, H. P. Hratchian, J. V. Ortiz, A. F. Izmaylov, J. L. Sonnenberg, D. Williams-Young, F. Ding, F. Lipparini, F. Egidi, J. Goings, B. Peng, A. Petrone, T. Henderson, D. Ranasinghe, V. G. Zakrzewski, J. Gao, N. Rega, G. Zheng, W. Liang, M. Hada, M. Ehara, K. Toyota, R. Fukuda, J. Hasegawa, M. Ishida, T. Nakajima, Y. Honda, O. Kitao, H. Nakai, T. Vreven, K. Throssell, J. A. Montgomery, Jr., J. E. Peralta, F. Ogliaro, M. J. Bearpark, J. J. Heyd, E. N. Brothers, K. N. Kudin, V. N. Staroverov, T. A. Keith, R. Kobayashi, J. Normand, K. Raghavachari, A. P. Rendell, J. C. Burant, S. S. Iyengar, J. Tomasi, M. Cossi, J. M. Millam, M. Klene, C. Adamo, R. Cammi, J. W. Ochterski, R. L. Martin, K. Morokuma, O. Farkas, J. B. Foresman, and D. J. Fox, GAUSSIAN 16 (Revision C.01) Gaussian Inc., Wallingford, CT, 2016.
